# Supplementary material for: Genetic variation in 9p21 is associated with fasting insulin in women but not men
Source: PLoS One. 2018 Aug 23;13(8):e0202365. doi: 10.1371/journal.pone.0202365 (PMC6107190; doi:10.1371/journal.pone.0202365)
Supplement: S2 Table — (XLSX) [file pone.0202365.s002.xlsx]

## Sheet: Sheet1
Table S2. Study raw data containing subjects' genotype and other characteristics
ID	Sex	HC	Ethnicity	rs10757274	rs10757278	rs2383206	rs1333049	RS4977574	Age	Height	Weight	Waist Circumference	BMI	Blood Pressure SYS	Blood Pressure DIA	Glucose	Insulin	CRP	TG	HDL	LDL
1	1	1	0	GG	GG	GG	CC	GG	24	177.3	60.5	68.4	19.24	118	82	4.4	30	0.34	0.42	1.9	2.18
2	0	.	3	AA	AA	AA	GG	AA	22	176	68.9	77.75	22.24	122	64	4.3	17	0.19	0.32	1.39	2.12
3	0	.	3	AA	AA	AA	GG	AA	21	183	75.5	72.5	22.54	116	75	5.3	69	0.8	0.95	1.88	2.35
4	1	0	1	AA	AA	AA	GG	AA	20	167.8	62.5	69.75	22.19	116	78	4.8	62	0.59	0.66	1.7	2.02
5	1	1	2	GA	AA	GA	GG	AG	23	152	60.8	75.5	26.31	91	63	4.6	136	4.87	1.97	1.75	2.17
6	1	1	0	GG	GA	GG	GC	GG	20	159	57.2	67.75	22.62	112	67	4.3	24	2.5	1.56	1.71	1.64
7	1	1	1	GA	GA	GA	GC	AG	25	154	44	62.333	18.55	106	63	4.5	32	0.23	0.6	2.3	2.55
8	1	0	1	GG	GG	GG	CC	GG	20	162	71.8	79.25	27.35	101	63	5	121	0.48	1.97	1.15	2.52
9	0	.	1	AA	AA	AA	GG	AA	24	173	60.5	68.7	20.21	113	76	4.8	60	0.15	0.81	1.25	1.98
10	0	.	2	GA	GA	GA	GC	AG	20	168	57.2	71.6	20.26	130	80	5.3	45	0.2	0.61	1.32	1.46
11	1	1	0	GA	AA	GA	GG	AG	22	165	49	66	17.99	105	67	4.3	64	0.2	1.48	2.44	2.55
12	1	1	3	AA	AA	AA	GG	AA	23	162.5	57	71.1	21.58	117	73	4.7	48	0.19	0.67	1.25	2.73
13	1	0	0	GG	GG	GG	CC	GG	20	169	60.8	72.25	21.28	115	68	4.8	23	0.8	0.97	1.26	1.83
14	1	0	2	AA	AA	AA	GG	AA	23	165	63.9	75.55	23.47	112	66	5.5	87	0.6	0.97	1.42	2.1
15	1	0	2	AA	AA	AA	GG	AA	21	170.5	58.3	69.167	20.05	112	62	5.1	55	0.9	0.81	1.6	1.9
16	0	.	2	AA	AA	AA	GG	AA	20	174	57.7	70.6	19.05	116	71	5.5	68	0.75	0.75	1.64	2.37
17	1	0	0	GG	GG	GG	CC	GG	20	158	49.8	67.8	19.94	103	64	4.1	32	6.4	0.45	1.54	2.01
18	0	.	0	GA	GA	GG	GC	AG	21	186	78.7	79.85	22.74	121	66	5.1	50	0.19	1.44	0.99	2.03
19	1	0	2	GG	GG	GG	CC	GG	21	167	72.6	81.95	26.03	111	67	5.7	96	0.3	0.75	1.4	2.21
20	1	0	1	GG	GG	GG	CC	GG	25	160	56.4	74.3	22.03	106	73	5.2	58	1.7	0.81	1.55	2.77
21	0	.	0	GA	GA	GA	GC	AG	26	182	78	82.8	23.54	137	78	4.8	51	1	1.35	1.4	2.2
22	0	.	1	AA	AA	AA	GG	AA	29	164.5	64.9	80.9	23.98	136	75	5.2	62	1.2	1.34	1.21	3.34
23	1	1	0	GG	GG	GG	CC	GG	23	161	65.3	69.8	25.19	116	78	5.1	39	0.15	1.08	1.99	2.26
24	1	0	1	GA	GA	GA	GC	AG	24	155	44.8	60.8	18.64	88	49	5.2	46	0.19	1.83	1.78	2.12
25	1	1	1	GA	GA	GA	GC	AG	20	153.5	54.1	69.9	22.96	101	66	4.7	67	9.9	1.79	1.53	2.89
26	0	.	0	GA	GA	GA	GC	AG	23	184	80.8	83.25	23.86	121	70	4.9	28	0.3	1.25	1.1	2.58
27	0	.	2	AA	GA	AA	GC	AA	29	160	58	70.95	22.65	124	78	5	43	0.59	1.58	1.55	2.58
28	0	.	1	AA	AA	AA	GG	AA	26	171	54.1	64.75	18.5	125	86	4.8	40	1.7	1.45	1.17	2.5
29	1	0	0	GA	GA	GA	GC	AG	24	165	55.3	66.25	20.31	110	73	5.4	65	1.41	1.41	1.13	1.51
30	1	0	2	GA	GA	GA	GC	AG	27	168	84.1	97.6	29.79	114	74	4.7	205	3.2	3.17	0.94	4.08
31	1	0	0	GA	GA	GA	GC	AG	23	173	64.1	67.8	21.41	123	79	4.9	46	0.4	0.68	2.11	3.19
32	1	0	1	GA	GA	GA	GC	AA	22	161	44.1	61.5	17.01	117	72	4.9	58	0.15	0.76	1.33	1.99
33	0	.	0	AA	AA	AA	GG	AA	22	184.5	74.2	78.55	21.79	152	75	4.7	27	0.3	0.66	1.6	1.82
34	1	1	0	GA	GA	GA	GC	AG	25	165	48.3	63.85	17.74	98	57	4.2	7	0.8	1.25	1.93	1.97
35	1	1	1	GG	GG	GG	CC	GG	26	167	57.9	68.5	20.76	117	71	4.8	56	0.6	0.84	2.36	1.85
36	0	.	0	GA	GA	GA	GC	AG	29	175	78.8	83.35	25.73	133	82	5.1	41	0.3	0.92	1.23	2.04
37	0	.	0	AA	AA	AA	GG	AA	29	174	78.6	90.35	25.96	141	75	5.6	51	0.9	1.66	1.37	3.88
38	1	1	0	AA	AA	AA	GG	AA	28	157	53.7	69.1	21.78	114	76	5.3	39	1.47	0.69	1.76	2.52
39	1	1	0	AA	AA	AA	GG	AA	24	164.5	59.5	68.85	21.98	120	69	4.7	28	8.72	1.31	1.66	1.61
40	0	.	1	AA	AA	AA	GG	AA	20	172	62.4	72.1	21.09	123	79	4.4	32	0.15	1.03	1.38	2.79
41	0	.	0	GG	GG	GG	CC	GG	20	173	71	82.25	23.72	106	71	4.7	50	0.58	1.05	1.22	2.05
42	0	.	2	GG	GG	GG	CC	GG	20	173	69.7	72.05	23.28	125	69	5.2	23	0.22	0.67	0.98	2.43
43	0	.	3	AA	AA	AA	GG	AA	21	183	86.7	83.9	25.88	133	79	5.4	45	0.19	0.92	1.06	2.25
44	0	.	2	GA	GA	GA	GC	AG	22	177.5	68.5	75.3	21.74	118	67	4.3	87	0.15	1.25	1.07	2.37
45	0	.	0	GG	GG	GG	CC	GG	29	174	81	97.1	26.75	136	82	5.8	162	0.5	2.71	1.13	3.74
46	1	1	0	AA	AA	AA	GG	AA	23	166	64.3	74.4	23.33	103	65	4.8	83	14	2.01	1.5	3.08
47	1	1	3	GG	GG	GG	CC	GG	20	168	63.3	72.25	22.42	111	65	4.6	67	0.25	1.01	1.5	3.2
48	1	0	0	GG	GG	GG	CC	GG	20	166.5	66	71.45	23.8	109	59	4.6	46	0.49	0.66	1.9	2.98
49	0	.	0	GA	AA	GA	GG	AG	24	182.5	70.4	75.55	21.13	124	73	5	45	0.24	1.18	1.3	2.52
50	0	.	2	GG	GG	GG	GC	GG	24	173	70.4	81	23.52	121	66	5.1	67	0.94	1.1	1.03	2.51
51	1	0	3	AA	AA	AA	GG	AA	23	167	48.7	61.75	17.46	103	64	5.1	60	0.2	0.73	2.16	2.17
52	1	0	0	GG	GG	GG	CC	GG	24	171.5	72.4	77.55	24.61	113	74	4.4	44	0.42	0.76	1.42	1.44
53	1	0	0	GA	GA	GG	GC	AG	20	169.5	69.2	78.75	24.08	109	69	5.4	84	0.15	1.14	0.98	1.59
54	1	0	0	GA	GA	GA	GC	AG	20	170	57.4	66.5	19.86	118	61	4.5	62	0.19	0.58	1.67	1.35
55	1	1	1	GA	GA	GA	GC	AG	23	137.5	54.1	66.35	28.61	115	71	4.6	56	0.19	0.61	1.55	3.08
56	1	1	2	GA	GA	GA	GC	AG	20	162	55.3	71.4	21.07	104	58	4.6	46	2.9	1.57	2.1	3.17
57	1	1	0	GA	GG	GG	CC	AG	23	173	87.4	93	29.2	136	78	4.9	113	1.45	1.16	1.61	1.78
58	1	1	0	GG	GG	GG	CC	GG	20	159.5	54.5	66.6	21.42	106	65	4.8	72	1.22	1.69	1.44	2.59
59	1	0	0	GG	GA	GG	GC	GG	21	165.5	74.6	76.75	27.23	118	59	5.1	62	1.3	0.67	1.36	2.21
60	0	.	2	GA	GA	GA	GC	AG	23	170	69	79.6	23.87	136	76	4.6	54	0.51	0.97	1.27	2.29
61	0	.	2	GA	GA	GA	GC	AG	28	177	89.1	91.6	28.44	140	87	6.1	112	0.63	3.49	0.83	2.55
62	1	1	0	GG	GA	GG	GC	GG	21	169.5	55.2	69.25	19.21	107	69	4.8	73	0.51	1.21	1.39	2.17
63	1	1	1	GA	GA	GA	GC	AG	22	155	66.5	77	27.67	118	70	5	53	4.09	1	1.74	1.75
64	1	0	1	GG	GG	GG	CC	GG	22	173	60	65.733	20.04	111	68	4.5	56	0.19	1.02	1.83	1.65
65	1	0	3	AA	AA	AA	GG	AA	23	164	53.8	67.167	20	103	54	4.6	42	0.34	0.8	1.31	2.13
66	1	0	1	GA	GA	GA	GC	AG	21	154	51.5	68.3	21.71	122	65	4.7	44	0.15	1.25	1.54	1.07
67	1	0	1	GA	GA	GA	GC	AG	20	158	54.5	67.2	21.83	104	68	5	82	0.15	0.97	1.76	1.03
68	0	.	0	GG	GG	GG	CC	GG	20	177.5	70.2	74.45	22.28	132	77	4.5	55	1.47	0.94	1.46	1.55
69	0	.	1	AA	AA	AA	GG	AA	26	171	58.6	75.25	20.04	107	52	4.8	31	0.3	0.7	1.22	1.81
70	0	.	1	GG	GG	GG	CC	GG	21	166.5	53.3	68.15	19.22	114	75	4.5	66	0.69	0.99	1.52	2.99
71	1	0	2	AA	AA	AA	GG	AA	22	163	58.6	70.2	22.05	102	63	4.9	75	0.48	1.33	1.3	2.35
72	1	0	1	AA	AA	AA	GG	AA	22	148	40.9	61.7	18.67	116	72	5	47	0.15	1.38	1.3	2.73
73	1	1	0	GA	GA	GA	GC	AG	28	164.5	58.9	71.25	21.76	109	62	4.5	26	0.22	1.29	1.65	2.81
74	1	0	1	GG	GG	GG	CC	GG	20	163.5	56.4	68.3	21.09	88	59	4.6	43	0.56	1.09	1.5	3.44
75	1	0	0	AA	AA	AA	GG	AA	23	161.5	53.1	66.65	20.35	93	51	4.6	48	0.17	0.68	2.18	1.08
76	1	0	1	GG	GG	GG	CC	GG	20	159.5	49.1	64.3	19.3	102	51	4.3	38	0.17	1.02	1.39	1.8
77	1	0	1	GA	GG	GA	CC	AG	20	157	42.6	65.667	17.28	121	86	4.4	33	0.87	1.24	1.53	1.1
78	0	.	0	GA	GA	GG	GC	AG	24	152.4	58.1	79.35	25.01	118	62	4.3	37	1.31	1.51	1.15	2.28
79	1	0	0	GG	GG	GG	CC	GG	21	171.3	69.2	75.033	23.58	110	70	4.7	99	0.19	0.76	1.48	2.35
80	1	0	1	GG	GG	GG	CC	GG	21	149	39	59.05	17.56	108	72	4.6	40	0.15	1	1.72	1.75
81	1	0	1	AA	AA	AA	GG	AA	24	161.5	56.6	66.55	21.7	120	78	5.1	50	0.15	1.37	1.57	1.96
82	1	0	3	GA	GA	GA	GC	AG	21	162	54.5	64	20.76	126	78	4.4	55	0.49	0.86	1.71	2.5
83	1	1	0	GA	GA	GA	GC	AG	21	161.9	66.2	75.45	25.25	112	60	4.4	28	0.92	1.05	1.31	2.1
84	1	0	0	GG	GG	GG	CC	GG	29	155.8	54.1	70.7	22.28	93	50	4.6	36	0.61	0.53	1.42	2.65
85	1	0	0	GA	GA	GA	GC	AG	21	166.7	69.6	85.25	25.04	126	75	4.5	33	0.42	1.34	1.47	3.26
86	1	1	0	GA	GA	GA	GC	AG	22	172	69.6	78.05	23.52	114	71	4.5	59	1.1	0.86	1.52	1.34
87	1	0	1	GA	GA	GA	GC	AG	21	158.3	44.2	61.4	17.63	97	72	4.6	44	0.4	0.76	1.8	1.17
88	0	.	2	AA	AA	AA	GG	AA	20	177.7	79.8	86.5	25.27	109	66	4.4	68	1.8	0.53	1.15	1.8
89	0	.	0	GA	GA	GA	GC	AG	20	176.1	63.3	77.8	20.41	123	74	4.5	46	0.19	0.89	1.33	1.75
90	1	1	0	GA	GA	GA	GC	AG	22	160	63.1	75.3	24.64	119	79	5	58	2.1	1.13	1.5	2.74
91	1	0	1	AA	GA	AA	GC	AA	21	157.8	46.6	63.367	18.71	107	64	5.1	60	0.19	0.94	1.47	2.24
92	0	.	2	GA	GA	GA	GC	AG	27	171.7	83.7	92.6	28.39	117	68	5.1	77	1.1	0.9	0.73	2.39
93	0	.	0	GA	GA	GA	GC	AG	23	179	94.8	94.95	29.58	126	75	4.8	67	0.7	0.85	1.34	1.85
94	0	.	0	GG	GG	GG	CC	GG	24	179.1	77	83.15	24	111	67	5.2	63	2.1	0.86	1.31	1.69
95	0	.	2	GA	GA	GA	GC	AG	22	166.6	64.1	71.95	23.09	105	70	4.8	55	0.3	1.59	1.03	2.88
96	0	.	1	GA	GA	GA	GC	AG	23	182.6	90.2	96.2	27.05	144	81	5	116	1.1	6.89	0.97	.
97	1	0	1	GA	GA	GA	GC	AG	20	162.4	58.6	69.25	22.21	104	67	4.7	85	0.8	0.97	2.23	2.17
98	1	1	1	GA	GA	GG	GC	AG	22	157	52.5	64.6	21.29	109	65	4	41	0.42	1.2	1.25	3.32
99	1	1	0	GA	GA	GA	GC	AG	22	167.5	57.9	70.8	20.63	108	65	4.6	33	2.2	0.62	2.66	2.61
100	1	0	1	AA	AA	AA	GG	AA	22	160.6	52.5	66.3	20.35	120	66	4.7	42	0.19	1.03	1.4	1.24
101	1	0	0	GA	GA	GA	GC	AG	21	153.5	58	75	24.61	106	58	5	59	0.19	0.84	2.61	2.34
102	1	1	0	GA	GA	GA	GC	AG	22	163.8	49.3	61.6	18.37	111	63	4.9	82	0.2	0.82	1.38	1.99
103	1	0	0	GA	GA	GA	GC	AG	23	168.3	50.6	65.2	17.86	103	57	5	40	0.15	0.7	1.47	1.62
104	1	0	3	GA	GA	GA	GC	AG	26	175.4	114.4	106.75	37.18	117	77	5.5	97	1.39	1.22	0.87	1.57
105	1	0	1	GA	AA	AA	GG	AG	22	165.2	66.7	76.55	24.44	109	66	4.9	92	0.49	1.61	1.23	2.51
106	1	0	1	GA	GA	GA	GC	AG	24	156.5	45.5	66	18.57	110	82	4.6	57	0.21	0.85	1.8	2.45
107	1	1	0	AA	AA	AA	GG	AA	23	163.5	55.3	66.65	20.68	106	62	4.6	38	3.7	0.8	1.51	1.48
108	1	0	1	GA	GA	GA	GC	AG	23	161.6	48.9	61.3	18.72	111	59	4.8	82	0.15	0.83	1.89	1.89
109	1	0	2	GA	GA	GA	GC	AG	20	157	76.1	88.15	30.87	135	92	4.9	141	0.2	2.19	1.43	5.02
110	1	0	0	GA	GA	GA	GC	AG	21	160.7	54.5	74.9	21.1	112	56	4.6	27	0.7	0.76	1.46	1.56
111	1	1	0	GA	GG	GG	CC	AG	21	157	55	76.55	22.31	108	77	5	70	1.5	1	1.52	3.58
112	1	0	1	AA	GA	AA	GC	AA	20	159	55.2	70.8	21.83	112	71	4.6	89	0.15	1.05	1.29	2.9
113	1	0	1	GA	GA	GA	GC	AG	21	161	54.5	67.967	21.02	101	66	3.7	201	0.6	1.53	1.76	2.13
114	1	1	1	GA	GA	GA	GC	AG	20	155.3	48.2	65.45	19.98	98	58	5.2	79	1.9	1.79	1.63	1.95
115	1	0	1	GA	GA	GA	GC	AG	26	164.9	56	68.65	20.59	113	69	4.5	68	0.15	0.57	1.85	2.1
116	1	1	1	GA	GA	GA	GC	AG	23	155.4	53.6	71.4	22.19	113	64	4.7	46	5.2	0.95	2.08	1.77
117	1	1	0	GG	GG	GG	CC	GG	20	160.1	52.6	70.45	20.52	120	87	5.1	56	0.5	0.86	1.46	3.49
118	1	0	3	GG	GG	GG	CC	GG	27	151	75.1	97.75	32.93	119	74	4.5	128	2.2	1.92	1.43	2.7
119	0	.	0	GA	GG	GG	CC	AG	27	185.8	67.3	76.9	19.49	132	81	4.8	41	0.3	1.25	1.06	1.01
120	0	.	2	AA	AA	AA	GG	AA	21	171.9	60.2	70.75	20.37	117	70	5.2	51	0.15	0.95	1.75	2.94
121	0	.	2	GA	GA	GA	GC	AG	25	182.7	64.1	72.75	19.2	123	67	4.7	43	0.19	1.05	1	1.89
122	0	.	0	GG	GG	GG	CC	GG	22	178.2	72.2	79.05	22.73	114	65	4.9	39	0.19	0.87	1.7	2.09
123	0	.	0	GA	GA	GA	GC	AG	21	171	73	83.65	24.96	112	58	4.8	76	0.5	2.23	1.15	3.58
124	1	1	0	AA	AA	GA	GG	AA	20	160	53.9	67.35	21.05	110	73	4.5	61	0.7	0.91	1.8	2.41
125	1	0	1	GA	GA	GA	GC	AG	23	163.2	66.2	78.05	24.85	114	63	3.8	36	0.19	0.65	1.69	2.85
126	1	0	1	GA	GA	GA	GC	AG	22	156.2	43.4	64.7	17.78	101	65	4.3	56	0.19	0.63	1.98	1.88
127	1	0	0	GA	GA	GA	GC	AG	26	160.2	51.9	66.75	20.22	112	71	5.2	50	0.2	1.03	1.42	2.52
128	1	0	2	AA	AA	AA	GG	AA	21	159.9	48.9	65.65	19.12	100	61	5.2	68	0.3	0.89	1.91	1.69
129	1	0	0	GA	GA	GA	GC	AG	20	172.4	71.2	70.15	23.95	103	64	4.5	76	0.3	1	1.34	1.69
130	0	.	1	GA	GA	GA	GC	AG	21	175.5	71.1	76.6	23.08	116	57	4.5	31	0.2	1.2	1.62	2.79
131	0	.	0	GG	GG	GG	CC	GG	25	181.8	65.9	72.5	19.93	112	75	4.9	52	0.2	0.68	1.47	1.96
132	1	0	1	AA	GA	AA	GC	AA	22	151.8	77.5	89.3	33.63	99	70	5	200	0.7	2.12	0.94	2.25
133	1	1	1	GA	GA	GA	GC	AG	22	164.2	72.6	83	26.92	130	76	5	76	0.7	1.03	1.78	2.12
134	1	0	2	GA	GA	GA	GC	AG	20	156.5	45	62.65	18.37	99	64	5.2	66	0.19	0.77	1.25	1.48
135	1	0	0	GA	GA	GA	GC	AG	26	158.2	69	81.45	27.56	119	72	4.4	92	1.5	0.75	1.24	1.76
136	1	0	3	AA	AA	GA	GG	AA	22	164.5	67.6	74.4	24.98	128	72	4.6	82	0.19	0.51	2.02	1.7
137	1	1	0	GA	GA	GA	GC	AG	26	162.1	54.1	70.35	20.58	113	67	4.6	39	1.5	1.36	1.61	2.25
138	1	0	1	GA	GA	GA	GC	AG	27	167.5	52.4	62.467	18.67	123	82	4.8	56	0.2	1.06	2.27	1.97
139	0	.	3	GG	GG	GG	CC	GG	21	183.6	73.8	76.65	21.89	123	77	5.3	68	0.4	2.21	1.17	2.81
140	1	1	0	GA	GA	GA	GC	AG	23	159.9	75.9	78.75	29.68	129	90	5	130	2.4	1.81	1.52	2.72
141	1	0	0	GA	AA	GA	GG	AG	20	163.5	73.6	83.65	27.53	118	67	5	83	0.2	1.13	1.3	2.44
142	1	0	0	GA	GA	GA	GC	AG	28	157.4	60	74.25	24.21	117	78	4.8	26	0.8	0.68	2.03	1.82
143	1	0	1	GA	GA	GA	GC	AG	22	160.8	58.8	71.5	22.74	93	60	4.6	53	0.19	1.04	1.86	2.04
144	1	0	0	GA	GA	GA	GC	AG	21	180	66	72.95	20.37	115	75	4.8	35	0.15	0.71	2.35	1.84
145	1	1	0	AA	AA	AA	GG	AA	22	167.4	60.5	72.55	21.58	128	76	4.9	77	0.53	1.15	1.93	2.11
146	1	0	0	GG	GG	GG	CC	GG	21	170	55.8	70	19.3	127	75	5.1	75	0.19	0.73	1.73	1.81
147	1	0	1	GG	GG	GG	CC	GG	22	143	40.7	67.6	19.9	117	63	4.8	83	0.19	0.76	1.97	2.82
148	1	0	1	GG	GG	GG	CC	GG	22	171.6	59.5	67.7	20.2	102	62	4.4	41	0.19	0.89	1.73	1.97
149	1	0	0	AA	GA	GA	GC	AA	23	159	63.4	75.5	25.07	109	61	4.8	56	0.54	1.12	0.95	3.52
150	1	0	1	GA	GA	GA	GC	AG	23	160.9	62.3	70.15	24.06	114	78	4.8	57	0.19	0.51	2.18	1.47
151	1	1	0	AA	AA	AA	GG	AA	22	165.9	57.5	72.15	20.89	114	63	4.7	51	0.61	0.74	2.81	2.19
152	1	1	0	GA	GA	GA	GC	AG	26	171.3	72.6	78.15	24.74	123	75	5.3	33	1.9	1.62	2.23	3.74
153	1	0	0	GA	GA	GA	GC	AG	20	171.5	79.4	79.85	26.99	117	73	5	72	0.17	0.82	1.45	1.57
154	1	0	3	AA	AA	GA	GG	AA	22	173.2	77.6	76.3	25.86	107	66	4.8	38	0.57	0.96	1.6	2.64
155	1	0	1	GA	GA	GA	GC	AG	21	166.2	51.3	64.2	18.57	114	68	5.5	26	0.19	0.99	1.47	2.48
156	1	0	1	AA	AA	AA	GG	AA	20	154.9	59.4	73.5	24.75	109	66	5.2	62	6	1.18	1.02	2.56
157	1	0	1	GA	GA	GA	GC	AG	23	154.4	44	62.3	18.45	99	61	5.2	42	0.6	1.34	1.71	2.87
158	1	0	1	GA	GA	GA	GC	AG	25	159.1	47.9	63.1	18.92	116	63	4.5	33	0.19	0.67	0.87	3.01
159	1	0	0	GA	AA	GA	GG	AG	28	163.9	50.6	65.75	18.83	105	61	4.2	40	0.3	1.17	1.82	2.12
160	1	0	1	AA	AA	AA	GG	AA	24	158.9	53.3	68.35	21.1	108	52	4.5	43	0.5	0.87	1.75	2.02
161	1	0	0	GA	GA	GA	GC	AG	20	160.2	52.5	72.35	20.45	102	58	5	52	0.19	0.88	1.15	1.8
162	1	1	3	GG	GG	GG	CC	GG	20	164.2	47.7	62.9	17.69	109	63	4.8	61	0.4	0.71	1.96	1.54
163	1	0	3	AA	AA	AA	GG	AA	28	159.9	72.4	77.7	28.31	114	74	4.9	59	0.6	0.87	1.45	3.49
164	1	1	0	GG	GG	GG	CC	GG	21	164.4	51	63.6	18.86	116	72	4.4	118	3.3	1.86	1.25	2.03
165	1	0	1	GA	GA	GA	GC	AG	22	158.1	59.2	74.4	23.68	103	60	4.8	52	0.19	1.06	1.47	1.9
166	1	0	2	GA	GA	GA	GC	AG	24	156.7	81.7	94.2	33.27	120	80	4.4	50	0.9	0.71	1.16	1.52
167	1	1	3	AA	AA	AA	GG	AA	23	161	73	83.5	28.16	126	81	4.8	66	7.5	1.49	1.12	2.69
168	1	0	1	GG	GG	GG	CC	GG	20	162.3	51.1	60.2	19.39	103	56	4.9	42	0.3	0.65	2.51	1.77
169	1	1	0	GA	GA	GG	GC	AG	23	165	67.1	72.5	24.64	113	62	4.4	48	5.4	1.17	2.04	1.06
170	1	0	2	GA	GA	GA	GC	AG	26	154.9	53.3	69.6	22.21	104	67	5.1	111	0.5	0.7	1.13	1.43
171	1	1	0	GA	GG	GG	CC	AG	24	169.2	60.9	74.4	21.27	122	76	4.7	31	1.8	1.22	1.72	2.95
172	1	1	0	AA	AA	AA	GG	AA	20	167.6	56.5	68.65	20.11	114	74	5.3	47	3.7	1.75	1.83	2.38
173	1	0	0	GA	GA	GA	GC	AG	20	163.2	69.8	76.2	26.2	104	63	4.7	97	1.3	0.86	1.19	3.03
174	1	1	0	GA	GA	GA	GC	AG	20	162.6	59.8	70.767	22.61	120	69	4.5	86	0.9	1.22	1.65	2.69
175	1	0	0	GA	GA	GG	GC	AG	28	172	73.6	77.75	24.87	115	64	5.2	102	0.4	0.92	1.66	2.35
176	1	1	0	GA	GA	GA	GC	AG	25	166.8	67.2	70.45	24.15	126	65	4.7	64	1.2	1.3	1.97	1.35
177	1	1	0	GA	GA	GG	GC	AG	20	164.4	56.9	72	21.05	105	64	4.5	101	1.5	1.17	1.57	2.08
178	1	0	0	GA	AA	GA	GG	AG	23	160.5	49.9	64.5	19.37	97	57	4	13	0.19	1	2.04	2.15
179	1	0	2	GA	GA	GA	GC	AG	21	158.7	51.8	68.35	20.56	101	62	4.8	50	2.7	0.64	1.18	1.38
180	1	0	2	AA	AA	AA	GG	AA	20	156.4	46.7	61.7	19.09	113	61	4.9	35	0.2	0.52	1.29	1.9
181	1	0	0	GA	GG	GG	CC	AG	24	162.5	94.2	104.75	35.67	106	60	4.7	301	0.5	1.33	1.03	2.58
182	0	.	0	GG	GA	GG	GC	GG	21	175.3	77.3	84.8	25.15	118	67	4.4	45	0.19	0.83	1.49	1.7
183	0	.	1	GG	GG	GG	CC	GG	21	168.2	56.6	70.6	20	118	72	5	36	0.7	1.09	1.41	2.66
184	0	.	0	GA	GA	GA	GC	AG	20	183.9	84.9	85.55	25.1	109	67	4.7	108	0.3	2.23	0.89	1.95
185	0	.	0	AA	AA	AA	GG	AA	24	192.2	100	94.167	27.07	126	70	4.7	62	0.5	1.16	1.58	2.85
186	0	.	0	AA	AA	AA	GG	AA	21	176.5	68.5	78.75	21.98	118	58	4.8	54	0.19	1.23	1.27	2.41
187	0	.	2	GA	GA	GG	GC	AG	25	162.8	59.6	76.7	22.48	120	72	4.6	13	0.6	0.73	1.43	2.23
188	1	1	2	AA	AA	AA	GG	AA	20	162.9	50.6	64.4	19.06	113	60	4.7	37	1.9	0.76	1.34	1.54
189	1	0	1	AA	AA	AA	GG	AA	21	165.6	57.6	70.7	21	117	80	4.9	19	0.19	1.15	3	1.05
190	0	.	1	GA	GA	GA	GC	AG	22	172.5	64.7	75	21.74	116	67	4.5	28	0.5	0.86	1.54	2.01
191	0	.	1	GA	GA	GA	GC	AG	22	176.6	60.3	70.75	19.33	132	79	4.7	85	3.1	0.76	1.82	2.4
192	0	.	0	GA	GA	GA	GC	AG	22	181.7	73.1	83.6	22.14	116	73	4.8	41	1	1.19	1.28	2.96
193	0	.	0	GG	GG	GG	CC	GG	24	176.5	67.2	77.45	21.57	132	68	4.3	15	0.4	0.61	1.94	0.93
194	0	.	0	GG	GG	GG	CC	GG	25	189.3	71	76.85	19.81	108	65	4.8	33	0.3	0.51	1.46	1.36
195	0	.	0	GG	GG	GG	CC	GG	21	171.6	63.8	77.75	21.66	129	70	4.1	23	0.19	0.72	1.51	2.02
196	0	.	2	GA	GA	GA	GC	AG	20	177.7	73.3	80	23.21	90	59	4.7	35	3.1	1.05	1	3
197	0	.	0	AA	AA	AA	GG	AA	21	182.6	65.3	73.45	19.58	114	70	5	19	0.3	0.96	1.2	1.46
198	1	0	1	GG	GG	GG	CC	GG	23	155.7	50.1	69	20.66	121	82	5.1	55	0.19	1.34	1.67	2.2
199	1	0	0	GA	GA	GA	GC	AG	20	167.8	64.7	74.35	22.97	114	63	4.6	28	0.3	0.73	1.23	3.68
200	1	0	1	AA	AA	AA	GG	AA	21	164.5	50.6	68.05	18.69	105	67	4.7	39	0.19	0.86	1.54	2.43
201	1	0	3	GA	GG	GA	CC	AG	22	166	63.7	73.45	23.11	113	73	4.4	48	1	0.82	2.13	1.37
202	1	1	1	GA	GA	GA	GC	AG	21	156.6	45.5	62.35	18.55	116	74	4.6	34	0.19	1.26	1.4	2.09
203	1	1	0	GG	GG	GG	CC	GG	20	164.9	65.4	77.1	24.05	115	77	4.8	58	0.6	1.06	1.63	3.23
204	0	.	0	AA	AA	AA	GG	AA	21	194.2	111	102.4	29.43	135	94	5.5	80	1.2	1.67	1.1	2.4
205	0	.	1	GA	GA	GA	GC	AG	22	174.2	61	72.733	20.1	110	65	4.8	33	0.7	0.7	1.35	1.98
206	1	0	0	GA	GA	GA	GC	AG	20	165.3	67.4	82.1	24.66	100	74	4.6	28	0.2	1.22	1.28	2.32
207	0	.	0	GA	GA	GA	GC	AG	24	179.3	68.2	75.7	21.21	133	67	4.8	32	0.9	0.76	1.08	2.25
208	0	.	1	GA	GA	GA	GC	AG	20	179	81.5	84.15	25.43	136	79	5.3	42	0.2	0.94	1.21	3.93
209	0	.	0	AA	AA	AA	GG	AA	24	182.3	74.2	81.15	22.32	131	72	4.8	30	0.8	0.56	1.11	1.72
210	0	.	1	GA	GA	GA	GC	AG	20	170	63.6	70.3	22	121	72	5.3	31	0.4	0.96	1.32	2.72
211	0	.	1	AA	AA	AA	GG	AA	23	166.9	66.8	74.75	23.98	124	67	4.4	17	1.5	0.83	1.19	2.16
212	0	.	1	GA	GA	GA	GC	AG	25	172.2	71.8	79.8	24.21	150	82	4.7	34	0.4	0.66	1.23	1.12
213	0	.	2	GG	GG	GG	CC	GG	20	182.9	78.9	81.3	23.58	122	68	5.1	72	3.2	0.99	1.01	2.08
214	0	.	1	GA	GA	GA	GC	AG	23	175.2	78.9	85.75	25.7	130	76	4.6	32	1.8	0.84	1.5	2.14
215	0	.	1	GA	GA	GA	GC	AG	24	171.6	70	80.3	23.77	129	52	4.7	26	0.5	1.03	1.31	2.47
216	1	0	1	GG	GG	GG	CC	GG	20	157.2	57.2	71.35	23.14	116	70	4.6	34	0.3	0.9	1.44	1.82
217	1	1	0	GG	GG	GG	CC	GG	20	172.5	60.2	71.25	20.23	116	67	4.8	120	2.2	1.26	1.51	2.14
218	1	1	2	AA	AA	AA	GG	AA	25	156.6	51.2	67.25	20.87	115	76	4.7	75	1.6	1.32	1.89	1.4
219	1	0	0	GA	GA	GA	GC	AG	29	160	53.7	71.05	20.97	102	64	4.6	49	0.19	0.72	1.14	1.82
220	1	0	1	GG	GG	GG	CC	GG	21	156.8	49.5	66.2	20.13	100	62	4.7	44	0.2	0.89	2.25	2.53
221	1	1	0	GA	GA	GA	GC	AG	27	163	70.8	82	26.64	103	68	4.9	55	0.6	1.38	1.25	1.95
222	1	0	1	GA	GA	GA	GC	AG	22	157.5	53.7	66.55	21.64	103	61	4.6	32	0.19	1.34	2.34	3.2
223	1	0	3	AA	AA	GA	GG	AA	21	157.2	48.1	65.75	19.46	114	67	4.5	54	0.19	0.91	1.97	1.91
224	1	0	1	GG	GG	GG	CC	GG	23	156.4	49.7	62.5	20.31	110	65	4.9	33	0.19	0.84	1.73	2.76
225	1	0	1	GA	GA	GA	GC	AG	23	165	53	66.85	19.46	113	66	4.9	50	0.19	0.96	1.74	2.9
226	1	0	2	GA	GA	GG	GC	AG	20	154.5	56.2	71.95	23.54	104	66	4.4	19	0.7	1.03	1.84	2.7
227	1	0	0	AA	AA	GA	GC	AA	26	164.6	51.2	64.4	18.89	102	67	4.1	13	2.3	0.53	2.22	2.31
228	0	.	1	AA	AA	AA	GG	AA	24	175.1	71	80.367	23.15	112	67	5.7	32	0.19	1.33	1.36	2.29
229	0	.	0	GG	GG	GG	CC	GG	29	170	73.3	89	25.36	115	66	4.6	39	1.4	2.31	1.22	2.7
230	0	.	1	AA	GA	AA	GC	AA	22	176.6	69	75.75	22.12	134	82	4.5	20	0.19	0.73	1.67	1.91
231	0	.	1	GA	GA	GA	GC	AG	23	172.8	65	76.45	21.76	106	72	4.5	32	0.19	0.83	1.76	3.5
232	1	0	0	GA	GA	GA	GC	AG	23	174	59	70.9	19.48	109	62	4.4	25	0.19	1.07	1.78	1.39
233	1	1	3	GA	GA	GA	GC	AG	25	162.8	69.9	80.85	26.37	109	72	5.1	60	0.7	1.67	1.07	1.61
234	1	1	0	GA	GA	GA	GC	AG	26	172.5	86.6	80.9	29.1	117	67	4.9	69	21	0.99	2.21	1.37
235	1	0	1	GA	GA	GA	GC	AG	25	160.8	47.4	68.767	18.33	93	52	4.1	23	0.3	0.53	3.09	0.87
236	1	0	1	AA	AA	AA	GG	AA	23	154.8	48.6	65.15	20.28	104	70	4.8	46	0.19	0.93	2.08	2.68
237	1	0	0	GG	GG	GG	CC	GG	22	161.7	57.2	71.45	21.87	104	71	4.5	28	0.2	0.67	1.45	3.45
238	0	.	2	GA	GA	GA	GC	AG	20	176.3	70.3	73.55	22.61	108	61	4.8	29	0.6	0.72	1.41	3.16
239	0	.	2	GG	GG	GG	CC	GG	20	172.4	66.1	78.05	22.23	122	74	4.9	60	0.4	1.49	1.08	2.91
240	0	.	0	GG	GG	GG	CC	GG	20	183.7	72.9	78.4	21.6	119	60	4.8	27	0.3	0.48	1.36	1.28
241	1	1	0	GG	GG	GG	CC	GG	22	167.7	66.2	76.6	23.53	125	76	4.9	38	3	1.41	1.64	1.65
242	1	0	1	GA	GA	GA	GC	AG	22	156.3	59.4	74.35	24.31	100	66	5.1	52	0.3	0.7	1.52	2.43
243	1	0	0	GG	GA	GG	GC	GG	23	159.8	62	69.2	24.27	110	67	5	36	0.19	0.71	2	1.71
244	1	1	0	GA	GA	GA	GC	AG	23	164.5	56	66.15	20.69	105	54	4.6	49	0.6	1.15	1.36	1.9
245	0	.	0	AA	AA	AA	GG	AA	22	187.6	74.7	78.55	21.22	128	73	4.7	26	2	0.4	1.32	1.47
246	0	.	1	GA	GA	GA	GC	AG	26	171.1	66.2	81	22.61	109	67	5.8	64	0.19	1.14	1.1	2.78
247	1	0	0	GG	GG	GG	CC	GG	20	167	59.8	68.8	21.44	105	62	4.7	38	0.3	0.72	2.06	1.49
248	0	.	1	GA	GA	GA	GC	AG	22	175.1	67.2	73.15	21.91	116	76	4.9	54	0.4	0.6	1.81	2.15
249	0	.	0	GA	GA	GA	GC	AG	20	169	73.1	84.35	25.59	120	70	4.9	124	1.8	0.65	1.48	1.64
250	0	.	0	AA	AA	AA	GG	AA	23	176.9	73.7	81.8	23.55	122	63	5.2	24	0.2	1.27	1.68	2.67
251	0	.	3	GA	GA	GG	GC	AG	26	184.8	96.8	100.95	28.34	133	72	5.3	82	0.7	1.29	1.16	3.03
252	0	.	2	GA	GA	GA	GC	AG	24	167.3	85.4	91.8	30.51	128	72	6.2	172	0.9	1.63	1.04	2.58
253	0	.	0	GG	GG	GG	CC	GG	23	171.8	65.9	78.4	22.32	124	72	4.5	22	1.9	0.91	1.25	2.61
254	1	0	2	GA	GA	GG	GC	AG	20	161.7	59.5	72.9	22.75	106	63	5.1	94	5.1	0.8	1.78	0.84
255	1	1	1	GA	GA	GA	GC	AG	23	157	59.7	70.733	24.22	114	67	4.5	53	3.8	0.98	2.36	1.14
256	1	0	0	GA	GA	GA	GC	AG	20	167	75.8	76.3	27.17	101	55	4.9	71	1	0.59	1.67	2.05
257	0	.	1	GA	GA	GA	GC	AG	22	176.8	62.9	73.8	20.12	131	69	4.5	74	0.19	1.71	1.22	2.6
258	1	0	2	GG	GG	GG	CC	GG	23	169.8	66.5	73.45	23.06	117	71	4.5	138	0.9	1.13	1.46	1.98
259	1	0	0	GA	GA	GA	GC	AG	21	168.7	50.9	67.15	17.88	104	50	5	44	0.3	0.87	1.74	2.21
260	0	.	0	GA	GA	GG	GC	AG	22	178.7	67.3	71.2	21.07	119	72	4.5	41	0.2	0.64	1.21	1.59
261	1	0	1	AA	AA	AA	GG	AA	20	165.4	60.6	72.15	22.15	113	69	4.3	35	0.19	1.12	1.66	1.19
262	0	.	0	AA	GA	GA	GC	AA	26	179.9	79	88.35	24.4	136	81	5.1	69	0.4	1.14	1.14	2.27
263	1	0	1	GA	GA	GA	GC	AG	27	161.8	55.8	65.8	21.31	107	74	4.6	31	0.3	0.68	1.85	1.81
264	1	1	0	GA	GA	GA	GC	AG	25	166	51.8	65.95	18.79	103	51	4.4	49	0.4	0.57	2.12	1.34
265	1	0	1	GG	GG	GG	CC	GG	21	164.9	54.1	74.85	19.89	112	46	4.1	34	1.6	1.44	0.72	1.34
266	1	0	1	GA	GA	GA	GC	AG	21	157.1	50	65.4	20.25	94	66	5.1	43	0.19	0.73	1.75	1.57
267	1	0	1	GA	GA	GA	GC	AG	24	160.7	59.5	68.45	23.04	108	81	4.5	37	0.2	0.72	1.61	1.95
268	1	0	1	AA	AA	AA	GG	AA	28	153	49.7	64.75	21.23	95	58	4.8	40	0.5	0.7	1.56	2.57
269	1	1	2	AA	AA	GA	GG	AA	20	165.7	64.5	70.3	23.49	113	67	4.4	27	1.4	0.52	2.22	1.12
270	1	0	0	AA	AA	AA	GG	AA	22	157.6	52.6	65.8	21.17	109	69	4.6	41	0.2	0.51	2.19	2.32
271	1	0	0	GG	GA	GG	GC	GG	21	171.1	59	70.45	20.15	117	67	4.4	45	0.3	0.39	1.5	1.1
272	1	0	2	AA	AA	AA	GG	AA	20	165.2	55	71.7	20.15	118	72	5.4	110	1	1.1	1.53	2.11
273	1	1	0	GG	GG	GG	CC	GG	22	158.1	52.9	67.3	21.16	108	69	4.6	.	0.3	0.96	1.49	1.37
274	1	1	0	GG	GG	GG	CC	GG	22	180.2	54.9	64.55	16.9	104	64	4.2	34	1.5	1.07	1.75	3.46
275	1	0	1	AA	AA	AA	GG	AA	20	155	58.8	74.1	24.47	120	74	4.7	41	1.3	0.97	1.24	2.51
276	1	0	0	GA	GA	GA	GC	AG	21	175.9	75.5	78.8	24.4	115	72	4.6	37	0.19	0.99	0.98	2.51
277	1	1	0	AA	AA	GA	GG	AA	20	151.1	48	67.2	21.02	103	58	4.9	36	0.5	0.98	1.35	3.05
278	1	0	1	GG	GG	GG	CC	GG	21	162	51.9	69.35	19.77	90	49	4.5	26	0.19	0.67	1.76	1.8
279	1	0	0	GA	AA	GA	GG	AG	20	162	75.4	86.25	28.73	103	66	4.6	61	0.6	0.82	1.29	2.16
280	1	0	1	GG	GG	GG	CC	GG	22	159.9	62.6	73.25	24.48	110	73	4.1	25	0.19	0.79	1.77	1.92
281	0	.	0	AA	AA	GA	GG	AA	23	168	58.7	73.25	20.79	115	70	4.8	56	0.5	1.21	1.31	2.25
282	0	.	1	GA	GA	GA	GC	AG	23	179.7	69.3	76	21.46	122	81	5	42	0.3	0.87	1.97	2.95
283	1	0	0	AA	AA	AA	GG	AA	27	166.3	51.1	67.8	18.47	108	63	4.8	21	0.2	0.56	1.3	1.17
284	1	1	0	GG	GG	GG	CC	GG	27	165.2	62.4	75.25	22.86	103	52	4.8	46	5.5	0.75	1.5	2.02
285	1	0	1	AA	AA	AA	GG	AA	22	169.7	57.7	66.7	20.03	108	64	5.3	75	0.19	0.92	1.2	1.34
286	1	0	1	AA	AA	AA	GG	AA	22	160.6	52.2	66.1	20.23	101	61	5.2	66	0.19	1.25	1.24	1.41
287	1	0	0	GG	GA	GG	GC	GG	25	178.1	90.5	88.55	28.53	110	69	5	33	1.4	1.28	1.19	2.62
288	1	0	1	GA	GA	GA	GC	AG	25	156.5	48.9	65.75	19.96	100	56	4.4	18	0.2	1.08	1.58	3
289	0	.	3	GA	GA	GA	GC	AG	21	181.2	74.6	78.65	22.72	136	71	5.2	40	0.2	0.98	0.8	1.95
290	1	0	1	GA	GA	GA	GC	AG	20	153.9	48.9	69.15	20.64	97	64	4.7	71	0.19	1.12	1.48	1.96
291	1	0	1	GA	GA	GA	GC	AG	23	168.5	50.7	64.8	17.85	99	71	4.7	34	0.3	1.11	1.49	2.63
292	1	0	3	AA	AA	AA	GG	AA	26	167	69.2	75.6	24.81	112	74	4.9	103	0.5	1.24	1.96	2.98
293	0	.	1	GA	GA	GA	GC	AG	23	168.6	58.3	71.5	20.5	104	63	4.8	34	0.2	0.63	1.55	1.79
294	0	.	0	AA	AA	AA	GG	AA	25	170.3	69.5	80.25	23.96	117	63	4.9	26	0.4	0.66	1.22	2.04
295	0	.	1	GA	AA	AA	GG	AG	22	173.3	70	76.6	23.3	122	75	4.8	35	0.7	0.84	1.63	3.59
296	0	.	1	GA	GA	GA	GC	AG	20	171.8	69.9	81.75	23.68	138	75	4.7	67	0.3	1.12	1.06	2.15
297	0	.	3	GA	GA	GA	GC	AG	22	189.2	109.4	104.15	30.56	114	67	4.8	88	5.4	2.57	0.89	2.6
298	1	1	0	GA	GA	GA	GC	AG	25	177.5	116.8	97.7	37.07	113	70	4.8	64	2.1	0.58	1.45	3.14
299	1	0	1	GA	GA	GA	GC	AG	21	155.1	45.9	67.3	19.08	102	60	4.3	24	0.8	0.76	1.57	2.22
300	1	0	3	GA	GA	GA	GC	AG	21	161.1	60	71.5	23.11	94	61	4.4	42	0.6	0.66	1.34	2.79
301	0	.	0	GA	GA	GA	GC	AG	22	184.8	77.7	80.55	22.75	124	68	4.8	13	1	0.57	1.45	1.77
302	0	.	0	GG	GG	GG	CC	GG	22	174.7	68.3	78.3	22.37	127	76	4.6	13	0.6	0.65	1.5	1.78
303	0	.	0	GG	GA	GG	GC	GG	26	178.4	97	99.6	30.47	123	72	5	49	3.9	1.2	1.37	4.17
304	0	.	0	GG	GG	GG	CC	GG	24	175.8	63.5	73.9	20.54	113	63	4.7	57	0.2	0.66	1.58	1.4
305	0	.	1	AA	AA	AA	GG	AA	25	169.5	63	81.35	21.92	112	63	4.7	33	0.3	1.19	1.19	1.56
306	1	0	1	GA	GA	GA	GC	AG	20	163	44.2	62.9	16.63	106	68	4.5	42	0.19	0.64	1.88	1.65
307	0	.	1	GA	GA	GA	GC	AA	20	175.3	56.5	69.367	18.38	117	59	4.4	35	0.19	0.47	1.69	1.75
308	1	0	2	GG	GG	GG	CC	GG	20	150.5	44	59.25	19.42	112	80	4.9	201	0.9	0.97	1.23	2.38
309	1	0	1	GG	GG	GG	CC	GG	20	152.4	50.5	61.35	21.74	100	65	4.6	48	0.8	0.89	1.81	2.05
310	0	.	3	AA	AA	AA	GG	AA	22	175.7	64	69.95	20.73	119	64	4.5	21	0.4	0.59	1.26	2.7
311	0	.	0	GG	GG	GG	CC	GG	23	176.5	67.2	73.95	21.57	130	84	4.6	19	0.8	1.15	1.27	1.77
312	0	.	0	GA	GA	GA	GC	AG	22	172.8	60.2	72.1	20.16	115	70	4.7	34	1.8	1.28	1	1.43
313	1	1	1	GG	GG	GG	CC	GG	23	162.6	51.7	62	19.55	103	59	4.3	35	0.19	0.95	2.14	1.39
314	1	0	2	GG	GG	GG	CC	GG	20	152.3	44.3	60.15	19.09	103	70	4.8	202	0.19	0.74	1.52	2.58
315	1	0	2	GA	GA	GA	GC	AG	26	153.7	52.3	73.9	22.13	113	65	5.1	25	0.5	0.83	1.44	1.41
316	1	0	0	GG	GG	GG	CC	GG	22	163.2	51.7	65.5	19.41	104	62	4.4	29	0.19	0.56	2.11	1.47
317	1	0	1	AA	AA	AA	GG	AA	20	152.6	47.9	68.2	20.56	98	54	4.9	51	0.19	0.79	1.16	1.81
318	1	1	0	AA	AA	AA	GG	AA	24	166.6	54.2	67.95	19.52	95	50	4.4	34	1.5	0.59	1.96	1.61
319	1	0	1	AA	AA	AA	GG	AA	26	166.5	51	61.95	18.39	112	70	4.2	29	0.19	0.71	1.23	1.18
320	1	0	1	GA	GA	GA	GC	AG	20	164.9	65	78.9	23.9	107	63	4.7	51	0.3	0.93	1.45	1.52
321	1	0	0	AA	AA	GA	GG	AA	20	170.8	57.9	66.55	19.84	95	56	4.8	26	6.9	0.74	1.73	2.17
322	0	.	1	GA	GA	GA	GC	AG	21	175	66.4	76.2	21.68	116	65	5.2	69	0.2	0.98	1.64	2
323	1	0	0	GA	GA	GA	GC	AG	23	171.7	59.3	67.1	20.11	111	65	5.3	54	0.2	0.58	1.59	2.26
324	0	.	0	AA	GA	AA	GC	AA	23	173.4	52.3	69.55	17.39	118	67	5	51	0.8	0.89	1.06	2.01
325	0	.	1	GA	GA	GA	GC	AG	23	164.9	56.9	70	20.92	124	73	5.3	51	0.2	0.88	1.57	2.9
326	0	.	2	AA	AA	AA	GG	AA	28	165.9	56	74.85	20.34	127	77	5.3	61	0.4	2.01	0.88	2.84
327	0	.	0	GG	GG	GG	CC	GG	25	170.2	58.2	70.3	20.09	134	62	4.8	37	0.3	0.45	1.78	1.48
328	1	0	0	AA	AA	AA	GG	AA	24	158.5	47.1	64.45	18.74	104	62	4.4	27	0.8	0.91	1.53	1.95
329	1	0	2	GA	GA	GG	GC	AG	20	167.9	68	75.15	24.12	116	60	5.6	90	0.6	0.83	1.13	1.16
330	1	0	3	GA	GA	GA	GC	AG	21	157.4	49.4	65.1	19.93	121	54	4.9	71	0.2	0.92	1.46	2.73
331	0	.	2	AA	AA	AA	GG	AA	22	184.2	75.4	80.1	22.22	121	67	5	85	3.5	0.53	1.46	1.87
332	0	.	0	GA	GA	GA	GC	AG	26	167.1	68.1	82.15	24.38	112	71	4.6	18	0.2	0.81	1.23	1.32
333	0	.	3	GA	GA	GA	GC		28	179.6	81.9	82.8	25.39	125	78	5.1	99	0.6	1.36	1.6	1.7
334	1	1	3	GA	GA	GA	GC	AG	21	162.8	49.8	65.1	18.78	111	66	4.6	88	1.5	1.66	1.55	2.63
335	1	1	0	GA	GA	GA	GC	AG	24	184	72.8	73.7	21.5	113	73	4.6	78	1.5	1.42	1.61	1.58
336	1	0	1	GA	GA	GA	GC	AG	25	167	63.3	69.4	22.69	105	69	5.3	64	0.19	0.84	1.32	3.36
337	1	1	3	GA	GA	GA	GC	AG	24	162.9	56.7	73.9	21.36	119	71	4.3	46	0.2	0.99	2.02	2.95
338	1	0	1	GA	GA	GA	GC	AG	21	150.4	43.7	61.1	19.31	112	69	4.9	20	0.3	0.58	1.88	2.54
339	1	0	0	GA	GG	GG	GC	GG	22	158.8	45.2	62.65	17.92	97	65	4	31	0.5	0.82	1.26	1.92
340	0	.	0	GA	GA	GA	GC	AG	25	183	94.3	89.15	28.15	134	70	4.7	61	0.3	0.94	1.05	2.76
341	1	0	1	AA	AA	AA	GG	AA	22	169	55.1	66.75	19.29	96	55	4.6	52	19.5	0.29	1.88	.
342	1	1	0	GA	GA	GA	GC	AG	25	159.5	56.7	69.35	22.28	111	72	4.1	45	5.6	1.35	1.61	2.43
343	0	.	1	GA	GA	GA	GC	AG	20	174.6	63.2	71.3	20.73	129	77	4.8	45	0.2	0.55	1.48	1.22
344	0	.	1	GA	GA	GA	GC	AG	22	171.5	88.3	92.7	30.02	143	93	5.2	80	0.5	1.1	1.18	2.52
345	0	.	0	AA	AA	AA	GG	AA	23	185.1	77.8	76.4	22.7	131	73	4.7	23	.	0.79	1.37	2.13
346	0	.	1	GA	GA	GA	GC	AG	20	177.2	80.6	87.25	25.66	148	99	5.4	54	0.2	0.88	1.33	1.85
347	0	.	1	GA	GA	GA	GC	AG	20	170	54.7	68.15	18.92	124	81	4.5	39	0.19	0.78	1.03	1.56
348	1	0	0	GA	GA	GA	GC	AG	20	169.4	58.4	68.2	20.35	109	61	4	30	0.4	0.37	1.7	1.06
349	1	0	1	AA	AA	AA	GG	AA	26	153.5	56.9	69.55	24.14	106	77	4.7	32	0.3	0.65	1.8	1.86
350	1	1	0	GA	GA	GA	GC	AG	20	171.9	64.7	72.75	21.89	100	67	4.5	61	4.7	3.04	2.16	2.92
351	1	1	1	GG	GG	GG	CC	GG	23	159.5	47.9	68.05	18.82	99	71	4.6	47	1.2	0.79	2.1	1.85
352	1	0	1	GA	GA	GA	GC	AG	21	162.7	55.8	70	21.07	104	59	4.7	38	0.2	0.79	1.64	2.16
353	1	0	1	GA	GA	GA	GC	AG	20	159.7	53.7	65.25	21.05	98	70	4.6	61	0.5	0.59	1.92	1.75
354	0	.	1	GA	GA	GA	GC	AG	23	174	81.9	88.65	27.05	128	71	4	60	0.3	1.95	1.23	2.22
355	0	.	1	GG	GG	GG	CC	GG	22	173.8	57.3	70.95	18.96	114	79	5.1	55	0.3	0.81	1.35	1.66
356	1	1	0	GA	GA	GA	GC	AG	27	156.5	63.4	79.85	25.88	104	72	5	79	2.1	2.48	1.4	2.7
357	1	0	1	GA	GA	GA	GC	AG	22	168.3	56	67.75	19.77	105	65	4.4	40	0.2	1.16	1.64	2.3
358	1	0	1	AA	AA	AA	GG	AA	28	158.4	48.4	68.45	19.29	91	55	4.8	35	0.2	0.79	1.61	2.19
359	0	.	3	AA	AA	GG	GG	AA	26	181.6	95.2	98.65	28.86	132	81	4.7	89	4.2	1.64	0.94	2.46
360	1	0	0	AA	GA	GA	GC	AA	21	163.5	74	79.7	27.68	110	62	5.1	65	0.5	0.75	1.77	3.11
361	1	1	0	GG	GG	GG	CC	GG	24	165.1	58.1	67.433	21.31	111	69	4.6	16	0.2	0.94	1.64	2.55
362	1	1	0	GG	GG	GG	CC	GG	22	159.6	59.8	70.4	23.47	102	67	4.2	13	12.9	1.22	1.95	2.75
363	1	0	1	GA	GA	GA	GC	AG	22	158.3	58	72.15	23.14	93	53	4.5	49	0.19	1.1	1.62	1.65
364	1	1	0	GG	GA	GG	GC	GG	22	158.1	56.5	67.467	22.6	103	60	4.5	39	0.3	0.91	1.4	3.39
365	0	.	0	GA	GA	GA	GC	AG	23	170.5	78	86.8	26.83	123	69	5.3	59	0.2	0.91	1.82	1.86
366	0	.	2	GG	GG	GG	CC	GG	23	191.8	67.4	73.55	18.32	129	83	4.9	59	0.2	0.65	1.35	1.8
367	0	.	0	GA	GA	GG	GC	AG	20	181.3	90.4	89.95	27.5	118	60	5.2	71	0.5	0.73	0.98	1.87
368	1	1	0	GG	GG	GG	CC	GG	20	160.3	61.4	74.6	23.89	133	75	4.9	68	0.5	0.94	1.99	2.34
369	1	0	1	GA	GA	GA	GC	AG	21	156.4	57.6	69.6	23.54	101	61	5	51	0.3	1.03	1.31	1.97
370	1	0	3	GG	GG	GG	CC	GG	20	168.3	86.5	89.4	30.53	113	71	5.4	307	5.1	1.17	1.54	2.8
371	1	0	1	GA	GA	GA	GC	AG	24	157.8	46.8	64.933	18.79	111	64	4.8	38	0.2	0.29	1.74	.
372	1	1	0	GA	GA	GA	GC	AG	23	166.4	78.3	84.45	28.27	120	73	4.5	38	5.1	1.07	2.01	1.55
373	1	0	2	GA	GA	GA	GG	AG	26	162.7	55.9	62.9	21.11	104	67	4.8	41	0.8	0.7	2.21	3.04
374	1	0	1	AA	AA	AA	GG	AA	23	162.4	59.5	72.8	22.56	116	76	4.9	39	0.2	0.94	2.07	2.35
375	1	0	1	GA	GA	GA	GC	AG	25	169.1	57.5	68.6	20.1	101	63	5.1	34	0.19	0.85	2.48	1.48
376	1	0	0	GA	GA	GA	GC	AG	24	178.8	72.6	76.2	22.7	131	69	4.7	51	0.2	0.96	1.57	2.82
377	1	0	3	GA	AA	GA	GG	AG	20	157.5	59.9	72.95	24.14	103	54	4.5	31	1	0.85	1.15	2.11
378	1	0	0	GA	GA	GA	GC	AG	26	169.9	59.7	70.25	20.68	114	67	4.5	46	0.2	0.69	1.75	1.3
379	1	0	0	GA	GA	GA	GC	AG	22	167	68.3	76.8	24.48	111	66	4.3	40	0.2	0.65	1.59	2.53
380	1	0	1	AA	GA	GA	GC	AA	21	156.8	56.2	69.45	22.85	107	62	4.7	.	0.19	1.12	1.12	1.48
381	1	0	0	GA	GA	GA	GC	AG	22	177.2	65.5	71.45	20.85	114	69	4.8	59	0.2	0.76	2.14	2.58
382	1	0	1	GA	GA	GA	GC	AG	20	170.1	48.4	66.75	16.72	98	59	4.7	38	0.19	0.69	1.83	1.26
383	1	1	3	GA	GA	GA	GC	AG	22	167.8	65.5	74	23.26	110	67	4.9	52	3.1	0.83	1.47	2.19
384	1	1	0	GG	GG	GG	CC	GG	20	163.7	78.8	91.8	29.4	109	68	5.1	162	1	6.81	1.14	.
385	1	1	0	AA	AA	AA	GG	AA	20	164.3	65.3	75.4	24.19	124	69	4.4	47	0.6	1	1.33	1.72
386	1	0	0	GA	GA	GA	GC	AG	23	165.9	59.8	73.25	21.72	120	71	4.7	35	0.19	0.54	1.88	1.04
387	0	.	0	GA	GA	GA	GC	AG	23	183.5	71.5	78.467	21.23	137	71	5.1	.	0.8	0.92	0.95	2.51
388	0	.	0	GG	GG	GG	CC	GG	20	182.9	82.9	78.2	24.78	100	49	4.4	52	0.19	0.53	1.6	1.29
389	0	.	2	GA	GA	GA	GC	AG	20	177.5	75.6	77.1	23.99	142	77	5.2	37	0.2	0.58	1.87	1.31
390	0	.	3	AA	AA	AA	GG	AA	20	174.6	80.2	83.65	26.3	120	74	5.7	124	0.19	0.51	1.85	1.98
391	0	.	1	GA	GA	GA	GC	AG	21	170.3	52.5	67.1	18.1	119	67	4.9	40	0.19	0.76	1.39	1.84
392	0	.	0	GA	GA	GA	GC	AG	29	180.3	90.3	91.4	27.77	129	62	5.4	39	0.8	1.05	1.76	1.57
393	0	.	1	AA	AA	AA	GG	AA	25	167.8	60.3	68.95	21.41	122	68	5.3	56	0.6	0.55	1.76	1.85
394	0	.	0	GG	GG	GG	CC	GG	23	184.8	87.3	87.3	25.56	135	79	5.1	47	0.2	0.82	1.36	1.45
395	0	.	1	AA	AA	AA	GG	AA	20	169.5	67.2	80.95	23.38	119	78	4.9	69	0.19	0.69	1.48	2.23
396	1	0	1	GG	GG	GG	CC	GG	22	165.1	52	65.6	19.07	103	65	4.1	22	0.19	0.56	1.94	2.28
397	1	0	1	GA	GA	GA	GC	AG	26	160.3	53.5	68.9	20.82	118	76	4.6	80	0.19	0.43	1.74	2.28
398	1	0	0	GA	GA	GA	GC		23	171.5	52.1	63	17.71	93	59	4.4	13	0.19	0.92	1.99	1.61
399	1	0	0	GA	GA	GA	GC	AG	20	168.3	67.3	72.25	23.76	103	59	4.6	41	0.6	1.13	1.1	2.52
400	1	0	1	GG	GG	GG	CC	GG	21	163.8	58.7	66.25	21.87	108	52	4.6	29	0.2	0.63	1.58	2.38
401	1	1	0	AA	AA	AA	GG	AA	20	164.78	50.4	62.333	18.56	111	69	5	40	4.7	1.43	1.86	2.53
402	1	0	1	GA	GA	GA	GC	AG	21	160.3	49.7	66.85	19.34	113	77	4.8	24	0.3	0.89	1.96	1.47
403	1	1	0	GA	GA	GA	GC	AG	21	157.5	52.1	67.3	21	110	70	5.3	66	1.9	2.09	1.33	1.64
404	1	1	0	GA	GA	GA	GC	AG	20	168.28	58.3	71.05	20.58	112	62	4.6	34	0.2	1.25	1.7	1.83
405	1	0	0	GA	GA	GA	GC	AG	22	164.1	82.1	84.55	30.48	107	60	5	25	1.9	0.38	2.14	1.19
406	1	1	0	AA	AA	AA	GG	AA	20	169.7	75.1	73.1	26.07	118	68	4.5	40	5.5	1.41	2.2	1.38
407	1	0	0	AA	AA	AA	GG	AA	24	173.8	70.2	74.9	23.24	114	67	4.6	47	0.19	0.47	1.61	1.85
408	0	.	0	GA	GG	GG	CC	AG	24	172.1	67.1	79.6	22.65	113	63	5.2	38	0.5	1.2	1.24	2.24
409	0	.	0	GG	GG	GG	CC	GG	20	182.56	65.1	73	19.53	118	68	4.3	36	0.4	1.34	2.12	1.67
410	0	.	1	GA	GA	GA	GC	AG	20	174.31	65.3	74.3	21.49	128	78	4.5	54	0.19	0.63	1.34	1.54
411	0	.	1	GA	GA	GA	GC	AG	21	184.2	80.7	80.4	23.78	121	68	5.3	36	4.6	0.86	1.32	2.02
412	0	.	0	GG	GA	GG	GC	GG	20	190.82	95.8	87.2	26.3	128	68	4.3	42	0.4	0.76	1.41	1.92
413	0	.	1	GA	GA	GA	GC	AG	20	173.7	77.7	81.7	25.75	131	66	4.9	42	0.5	1.47	1.79	2.43
414	0	.	0	GA	GA	GA	CC	AG	24	185.6	73.5	72.9	21.33	118	75	4.6	46	0.19	0.7	1.26	2
415	0	.	0	GA	GA	GA	GC	AG	20	174.3	78.4	84.4	25.8	136	73	4.9	19	0.7	0.95	1.55	2.09
416	0	.	0	GA	GA	GA	GC	AG	24	167.5	62.8	81.15	22.38	124	70	4.6	20	2.4	0.6	1.13	3.02
417	0	.	0	AA	AA	AA	GG	AA	21	169.4	69.4	75.45	24.18	136	75	4.6	54	0.19	0.55	1.91	1.82
418	0	.	0	GG	GG	GG	CC	GG	23	171.5	91	97.25	30.93	124	86	5.5	100	3.4	3.69	0.9	1.64
419	0	.	1	AA	AA	AA	GG	AA	28	167	47.3	60.15	16.96	107	69	5.3	35	0.3	0.68	1.89	1.8
420	0	.	1	GA	GA	GA	GC	AG	21	172.4	63.5	72.35	21.36	116	63	5.2	42	0.19	0.93	1.43	2.89
421	1	0	1	GA	GA	GA	GC	AG	23	161.1	51.7	67.6	19.92	112	67	4.5	38	0.4	0.74	1.73	1.82
422	1	0	3	AA	AA	AA	GG	AA	24	163.5	73.3	79.2	27.42	127	84	4.8	74	3.1	1.22	2.47	1.79
423	1	0	2	GA	GA	GA	GC	AG	20	170.8	74.5	75.65	25.53	112	73	4.1	16	0.9	0.29	1.6	.
424	1	0	1	GA	GA	GA	GC	AG	24	154.1	46.9	66.5	19.75	107	66	4.5	78	0.3	0.68	1.88	2.61
425	1	0	0	AA	AA	GA	GG	AA	27	168	91.3	92.45	32.34	115	75	5.2	69	0.5	0.86	1.22	2.64
426	1	1	0	GA	GA	GA	GC	AG	21	171.93	86.5	84.3	29.26	117	62	4.6	42	0.7	0.95	1.47	1.6
427	1	0	0	AA	AA	AA	GG	AA	22	165.6	57	77.35	20.78	124	65	4.8	61	0.19	0.99	1.53	1.34
428	1	1	0	GG	GG	GG	CC	GG	25	157.2	55.2	66.05	22.33	119	69	4.8	24	0.7	0.99	1.94	2.04
429	1	0	0	GA	GA	GA	GC	AG	27	170	64.6	74.9	22.35	119	78	5.1	31	1.4	0.89	2.41	3.7
430	1	0	0	GA	GA	GA	GC	AG	22	160.3	60.2	74	23.42	119	71	4.9	65	0.2	0.73	1.08	1.87
431	1	1	0	GA	GA	GA	GC	AG	26	164.6	59.7	67.1	22.03	115	60	4.7	35	1.5	0.87	1.47	3.24
432	1	1	0	AA	AA	AA	GG	AA	21	157	54.1	72.6	21.94	108	65	4.7	63	3.2	1.55	1.44	3.27
433	1	1	0	AA	AA	AA	GG	AA	20	163.4	60.8	72.5	22.77	128	78	4.5	30	0.7	1.04	2.14	3.76
434	1	0	0	AA	AA	AA	GG	AA	27	174.3	54.1	64.75	17.8	121	80	4.4	20	0.4	0.91	3	2.77
435	1	0	0	AA	GA	GA	GC	AA	24	165.7	64.1	74.067	23.34	112	77	5	50	9.4	1.54	1.99	2.9
436	1	0	0	GA	GA	GA	GC	AG	27	160.4	53.4	66.45	20.75	106	59	4.5	53	0.8	0.73	1.45	1.76
437	1	0	0	GG	GG	GG	CC	GG	20	166.1	61.6	66.3	22.32	113	80	4.8	22	1.4	0.66	1.8	1.54
438	1	0	1	GG	GG	GG	CC	GG	22	161.9	48.2	62.5	18.38	109	69	5	40	0.2	0.72	1.44	2.75
439	1	0	0	GA	GA	GA	GC	AG	23	161.8	61.5	70.05	23.49	109	68	4.8	62	0.3	0.93	1.87	1.61
440	1	0	1	GA	GA	GA	GC	AG	20	163.7	48.2	61.25	17.98	112	71	4.7	33	0.2	0.56	1.69	1.25
441	1	0	0	AA	AA	AA	GG	AA	24	182.9	64.7	68.8	19.34	98	60	4.3	17	0.19	0.65	1.92	2.07
442	1	0	0	AA	AA	AA	GG	AA	26	158.9	57.9	67.35	22.93	105	63	4.2	13	0.19	0.4	2.12	1.58
443	0	.	1	GA	GA	GA	GC	AG	23	167	62.9	71.9	22.55	107	61	5.1	23	0.2	1	1.53	1.9
444	0	.	0	AA	AA	AA	GG	AA	25	172.9	78.5	85.1	26.25	131	72	5	27	0.5	1.25	1.46	2.66
445	0	.	0	AA	AA	AA	GG	AA	22	168.6	69.5	80.5	24.44	130	79	5	49	4	1.81	1.06	2.88
446	0	.	1	GG	GG	GG	CC	GG	26	176.4	70.5	77.45	22.65	129	78	5	63	0.3	0.59	1.59	1.92
447	0	.	0	AA	AA	AA	GG	AA	24	151.3	70.5	78.55	30.79	132	73	5.2	36	0.19	0.83	1.74	2.09
448	0	.	0	GA	AA	GA	GG	AG	25	177.8	71.8	78.6	22.71	127	83	5.1	56	0.4	0.74	1.85	1.75
449	0	.	0	GG	GG	GG	CC	GG	20	186.8	81.2	74.35	23.27	120	66	4.5	33	0.7	0.73	1.77	0.94
450	0	.	0	GA	GA	GA	GC	AG	22	182.2	87.5	88.1	26.35	142	77	4.9	57	0.3	1.13	0.92	2.46
451	1	0	1	AA	AA	AA	GG	AA	20	163.7	66.8	72.25	24.92	108	66	4.7	42	0.19	0.63	1.77	1.89
452	1	1	0	AA	AA	AA	GG	AA	20	169.4	70.7	71	24.63	116	74	4.4	58	1.2	1.52	1.77	2.43
453	1	0	0	AA	AA	GA	GG	AA	21	154.6	60.5	73.55	25.31	122	79	5.3	36	1.9	1.14	1.84	4.2
454	0	.	3	GA	AA	GA	GG	AA	23	161.8	66.3	85.533	25.32	121	60	4.8	33	0.3	0.77	1.47	2.56
455	0	.	0	AA	AA	AA	GG	AA	21	172.6	73.4	83.5	24.63	125	68	5.2	37	0.3	0.8	1.56	1.01
456	0	.	0	GA	AA	GA	GG	AG	22	181.1	75.8	79.65	23.11	129	79	4.8	34	0.3	0.76	1.15	1.82
457	1	0	0	AA	AA	AA	GG	AA	21	177.3	65.7	70.2	20.9	116	70	4.3	66	0.7	0.75	1.7	1.42
458	1	1	3	GA	GA	GA	GC	AG	24	168.91	57.9	71.35	20.29	117	89	4.4	13	1	1.14	2.49	1.96
459	1	0	2	GG	GG	GG	CC	GG	21	168	53.4	66	18.92	112	62	4.8	45	0.2	0.78	1.37	2.2
460	1	1	0	GG	GG	GG	CC	GG	23	172.2	60.7	69.15	20.47	119	71	4.9	60	1	1.16	1.57	2.17
461	1	1	3	GG	GG	GG	CC	GG	23	162.6	57.5	68.933	21.74	106	73	5.1	84	4	1.52	1.75	1.21
462	1	1	0	AA	AA	AA	GG		25	161.4	71.9	76.6	27.6	119	73	4.6	55	0.5	2.01	1.54	3.33
463	1	1	0	GA	GA	GA	GC	AG	24	174.3	61	69.1	20.07	128	78	4.5	39	1.3	1.05	1.88	1.37
464	1	1	0	GA	GA	GA	GC	AG	24	171.1	69.3	72.6	23.67	129	72	4.8	40	0.19	0.93	1.79	0.91
465	1	1	0	GA	GA	GA	GC	AG	23	167	64.7	73.1	23.19	111	65	5.1	30	1.9	1.64	1.42	3.17
466	1	0	0	GG	GG	GG	CC	GG	21	165.6	55.8	70.15	20.34	122	70	4.8	60	0.5	0.72	2.21	2.4
467	1	0	0	GA	GA	GA	GC	AG	23	175.4	75.2	79.65	24.44	119	69	4.2	44	0.9	1.24	1.44	2.36
468	1	0	1	AA	AA	AA	GG	AA	22	163	60.3	72.25	22.69	109	68	4.9	38	0.19	0.61	1.79	1.83
469	1	0	2	AA	AA	AA	GG	AA	23	161.3	57.4	67.4	22.06	111	62	4.9	30	0.4	0.6	1.67	1.47
470	1	0	1	GG	GG	GG	CC	GG	20	163.5	54.8	64.4	20.49	107	67	5.4	44	0.19	0.8	1.5	2.31
471	1	1	1	AA	AA	AA	GG	AA	27	165.4	54.1	70.1	19.77	106	59	4.4	50	1.3	0.94	1.66	1.61
472	1	0	0	GA	GA	GA	GC	AG	23	167.8	65.9	69.7	23.4	117	65	4.7	61	0.5	0.67	1.4	1.9
473	0	.	0	AA	AA	AA	GG	AA	20	184.5	72.9	78.7	21.41	125	69	4.7	36	0.2	0.54	1.7	3.12
474	0	.	0	GA	GA	GA	GC	AG	26	181.5	86.2	87.6	26.16	127	66	4.7	30	1	0.99	1.45	3.54
475	0	.	0	GA	GA	GA	GC	AG	25	170.3	71.3	78.75	24.58	116	68	4.3	13	0.2	1.69	1.05	2.44
476	1	0	0	GA	GA	GA	GC	AG	24	183.2	68.7	75.5	20.46	118	69	4.3	35	0.3	0.67	1.72	2.69
477	1	1	3	GA	GA	GA	GC	AG	20	167	88.8	90.85	31.84	134	77	4.8	92	0.8	1.44	1.34	3.31
478	1	1	1	AA	AA	AA	GG	AA	25	151.8	42.4	61.05	18.4	111	65	4.6	43	0.5	0.82	1.75	0.93
479	1	0	1	GG	GA	GA	GC	GG	21	161.8	53	67.35	20.24	106	62	4.7	13	0.3	0.94	2.26	2.47
480	1	1	0	GG	GG	GG	CC	GG	20	164.9	63.5	73.5	23.35	100	54	4.5	42	4.4	1.06	1.86	2.12
481	1	0	1	AA	GA	AA	GC	AA	20	161.3	60.4	70.75	23.21	108	70	4.6	39	0.2	1.64	1.22	1.37
482	1	0	3	AA	AA	AA	GG	AA	26	155.4	46	61.85	19.04	114	70	4.1	186	0.3	0.45	1.42	1.74
483	1	1	1	GA	GA	GA	GC	AG	27	162.2	48.8	63.6	18.54	104	70	5.2	17	0.4	1.04	2.28	0.68
484	0	.	0	GA	GA	GA	GC	AG	26	176.4	58.1	73	18.67	112	71	4.7	16	0.2	0.92	1.46	2.56
485	1	0	0	AA	AA	AA	GG	AA	26	153.4	61.8	73.9	26.26	121	76	4.7	21	0.6	1.79	1.25	2.8
486	1	1	0	GA	GA	GA	GC	AG	23	164.3	51.3	63.75	19	115	80	4.3	54	18.9	0.97	1.63	1.05
487	0	.	2	GG	GG	GG	CC	GG	25	187.6	80.7	83.133	22.93	122	68	5.3	91	0.5	0.73	1.33	3.1
488	0	.	0	GG	GG	GG	CC	GG	20	175.4	81.5	83.75	26.49	125	53	4.8	19	0.2	0.61	1.08	2.47
489	1	1	0	AA	AA	AA	GG	AA	22	162.2	50.7	66.15	19.27	105	68	4.3	26	1.9	1.35	1.57	2.18
490	1	1	1	GA	GA	GA	GC	AG	20	158.9	63.4	76.1	25.1	113	79	4.6	55	6.7	0.78	2.09	2.12
491	1	0	0	GG	GG	GG	CC	GG	22	164.3	54.2	67.667	20.07	116	73	4.9	57	0.3	0.89	1.39	1
492	1	1	0	GA	GA	GA	GC	AG	25	163.2	68.1	76.75	25.56	129	81	4.3	54	5.6	1.18	1.69	0.78
493	1	0	0	AA	AA	AA	GG	AA	20	162.6	60.4	72.65	22.84	102	65	5	61	0.8	0.87	1.66	2.21
494	1	1	0	GA	GA	GA	GC	AG	22	164.1	65	74.267	24.13	99	61	4.7	29	4.1	0.74	1.64	2.27
495	0	.	3	AA	AA	AA	GG	AA	20	167.8	87.8	92.2	31.18	133	70	4.3	63	0.5	1.24	1.04	3.41
496	1	1	0	GA	GA	GA	GC	AG	28	170.8	71.8	78.6	24.61	110	65	4.4	41	0.9	1.19	2.13	2.68
497	1	0	1	GG	GG	GG	CC	GG	20	167.6	54.8	69.4	19.5	109	77	5.5	46	0.19	0.87	1.86	2.21
498	0	.	0	GG	GG	GG	CC	GG	23	178.9	76.7	81	23.96	119	58	5.1	48	0.5	0.74	1.43	1.91
499	1	1	3	GA	GA	GA	GC	AG	26	162.2	98.8	102.15	37.55	110	73	4.6	64	6.7	1.01	1.65	2.99
500	1	0	1	GA	GA	GA	GC	AG	24	161.1	52.7	69.5	20.3	82	54	4.7	32	0.19	0.92	1.56	2.04
501	1	1	0	AA	AA	AA	GG	AA	23	174.6	62.9	72.5	20.63	125	76	5.3	37	0.4	0.9	1.83	1.82
502	0	.	1	GA	GA	GA	GC	AG	25	175.3	56.9	70.05	18.51	114	66	4.5	58	0.19	1.13	1.32	1.78
503	1	0	0	AA	GA	GA	GG	AA	21	156.8	49.5	63.25	20.13	114	58	5.4	41	0.3	0.65	1.62	2.26
504	0	.	2	GA	GA	GA	GC	AG	21	177	88.7	91.9	28.31	131	71	5.2	70	0.5	1.33	1.01	3.11
505	1	1	1	GG	GG	GG	CC	GG	29	163	75.4	80.4	28.37	107	72	5.8	157	2.7	2.24	1.27	2.54
506	0	.	1	AA	AA	AA	GG	AA	20	175.3	79	79.2	25.7	142	77	4.7	46	0.19	1.19	1.29	1.7
507	1	1	1	GA	GA	GA	GC	AG	25	170.2	62.6	72.75	21.61	107	71	4.3	38	6.8	2.78	1.6	2.98
508	0	.	1	GA	GA	GA	GC	AG	20	174.9	87.5	89.9	28.6	134	81	4.8	109	1.3	2.37	1.33	4.28
509	0	.	1	GG	GG	GG	CC	GG	24	171.3	65.1	77.4	22.18	129	75	5.1	45	0.6	0.63	1.28	1.63
510	1	0	0	GA	GA	GA	GC	AG	21	165.1	58.7	68.5	21.53	107	64	4.4	25	0.3	0.56	1.72	0.73
511	0	.	1	GA	GA	GA	GC	AG	23	162.9	61.5	76.2	23.17	118	68	5.1	56	0.19	1.04	1.37	2.35
512	1	0	1	GA	GA	GA	GC	AG	22	155.9	55.5	69.8	22.83	99	70	4.7	40	0.5	0.94	2.26	2.39
513	0	.	2	GA	GA	GA	GC	AG	23	173.4	57.5	71.6	19.12	118	67	5	44	0.2	0.62	1.87	2.08
514	1	0	0	GA	GA	GA	GC	AG	27	160.2	58.7	73.2	22.87	105	68	4.7	28	0.2	0.67	1.83	2.37
515	0	.	1	GA	GA	GA	GC	AG	21	163.8	70.7	81.7	26.35	135	70	4.8	37	2	2.63	1.4	3.77
516	1	0	2	GA	GA	GA	GC	AG	20	164.6	67.8	77.8	25.02	104	63	4.6	64	0.4	0.58	1.56	2.7
517	1	0	1	GA	GA	GA	GC	AG	23	159.4	45.8	64.65	18.02	110	71	4.4	40	0.19	0.55	1.46	1.6
518	1	1	0	AA	AA	AA	GG	AA	22	164.9	54.7	64.15	20.11	95	58	4.2	55	0.8	1.03	2.09	1.66
519	1	0	0	AA	AA	AA	GG	AA	20	159.1	52.8	65.9	20.85	107	63	4.9	44	0.7	0.87	1.44	2.03
520	1	1	0	GA	GA	GA	GC	AG	23	157.8	50.9	65.9	20.44	118	76	4.5	32	3.4	0.89	1.88	1.22
521	1	0	0	GA	GA	GA	GC	AG	25	174.6	69.5	80.65	22.79	94	67	4.6	33	0.3	1.02	1.53	3.05
522	1	0	1	GG	GG	GG	CC	GG	20	166.2	55.8	66.9	20.2	106	62	4.8	39	0.2	0.79	1.33	2.34
523	0	.	1	GA	GA	GA	GC	AG	20	171.6	57.1	68.75	19.39	112	69	5.1	36	0.19	0.57	1.32	2.19
524	1	0	0	GA	GA	GA	GC	AG	29	161.7	51.7	68.95	19.77	115	68	5	13	0.19	0.61	1.36	2.56
525	1	0	0	GA	GA	GA	GC	AG	22	184	101.9	100.95	30.09	135	81	4.6	95	0.2	1.11	1.54	2.63
526	1	1	0	AA	AA	AA	GG	AA	23	165.9	62.9	74.8	22.85	114	62	4.4	21	2.3	1.07	1.64	1.89
527	0	.	1	GA	GA	GA	GC	AG	23	170.5	67.3	79.2	23.15	128	63	5	72	0.19	0.84	1.75	1.79
528	1	0	1	GA	GA	GA	GC	AG	23	164.1	67.6	82.033	25.1	113	65	5	103	4.9	2.5	1.69	1.39
529	0	.	2	GG	GG	GG	CC	GG	26	175.7	56.8	72.5	18.39	134	86	4.8	65	0.6	1.14	1.23	2.24
530	1	0	0	GA	GA	GA	GC	AG	22	168.1	65.4	76.45	23.14	119	61	4.8	79	0.2	1.01	2.06	2.01
531	0	.	1	GA	GA	GA	GC	AG	21	178.1	64.9	74.55	20.46	117	62	4.6	27	0.2	0.89	1.53	2.67
532	1	0	1	GG	GG	GG	CC	GG	26	161.9	50.8	66.2	19.38	114	64	4.6	24	0.19	0.75	2.01	2.63
533	1	1	1	GA	GA	GA	GC	AG	25	160.2	52.8	68.3	20.57	109	74	5	70	0.9	0.83	1.45	1.48
534	1	0	3	GG	GA	GG	GC	GG	21	154.8	57.2	70.05	23.87	112	64	4	36	2.3	0.68	1.42	1.89
535	1	1	0	GG	GG	GG	CC	GG	21	167.2	66.5	75.733	23.78	107	76	4.3	65	3.5	2.4	1.65	3.45
536	1	0	1	GA	GA	GA	GC	AG	23	167	58.3	67.45	20.9	88	60	4.5	62	0.9	0.62	1.44	1.66
537	1	0	1	AA	AA	AA	GG	AA	20	159.1	65	81.85	25.67	113	69	4.9	46	1.7	1.02	1.3	2.11
538	1	0	1	AA	AA	AA	GG	AA	22	164.2	51.3	68.55	19.02	105	70	4.7	30	0.5	1.23	2.01	2.19
539	1	1	0	GA	GA	GA	GC	AG	26	158.3	56.6	68.25	22.58	108	63	4.8	74	3.3	0.84	1.49	1.73
540	1	1	0	GA	GA	GA	GC	AG	28	167.65	63.4	70.85	22.55	110	66	4.4	37	6	0.75	1.71	2.53
541	1	0	0	GG	GG	GG	CC	GG	28	158.8	68.3	77.133	27.08	116	66	4.3	21	1.5	0.49	2.27	2.11
542	0	.	0	GG	GA	GG	GC	GG	22	188.7	88.5	86.75	24.85	138	84	5.3	113	1.7	2.48	1.02	2
543	1	1	0	GA	GA	GA	GC	AG	25	150.9	74.3	88.15	32.62	116	66	5	88	7.1	1.34	1.89	3.16
544	1	0	1	GA	GA	GA	GC	AG	22	150.8	49.6	68.733	21.81	109	67	3.9	32	0.3	1.13	1.26	2.47
545	1	0	0	GA	GA	GA	GC	AG	27	172.1	69.9	78.767	23.6	109	60	4.5	31	2.4	0.54	1.81	1.9
546	1	0	1	AA	AA	AA	GG	AA	28	165.3	54.3	68.75	19.87	107	69	4	23	0.3	0.93	1.69	2.91
547	0	.	0	GG	GG	GG	CC	GG	22	177	66	75.5	21.06	120	63	4	22	0.4	0.75	1.68	1.17
548	1	1	3	AA	AA	AA	GG	AA	26	158.5	60	74.55	23.88	113	70	5	40	1.4	1.98	2.11	2.47
549	1	0	0	GA	GA	GA	GC	AG	21	158.7	73	79.3	28.98	104	66	4.3	26	4	2.31	1	1.84
550	1	0	1	AA	AA	AA	GG	AA	20	152.6	48.8	64.85	20.95	119	83	5.2	71	0.7	0.96	1.71	2.46
551	1	0	1	AA	AA	AA	GG	AA	24	162.1	54.4	64.25	20.7	102	64	4.4	31	0.2	0.64	1.98	2.99
552	1	0	1	AA	AA	AA	GG	AA	22	167	58.6	68.65	21.01	89	50	4.6	41	0.2	0.71	1.7	1.8
553	1	0	1	GG	GG	GG	CC	GG	25	167.8	59.8	68.6	21.23	106	62	4.3	41	0.2	1.3	1.47	2.37
554	0	.	1	GG	GG	GG	CC	GG	21	174.2	77.8	85.15	25.63	116	58	4.7	124	0.4	1.37	1.1	2.46
555	0	.	0	GG	GG	GG	CC	GG	24	180.5	74.2	77.7	22.77	131	64	4.6	25	0.3	0.71	1.57	2.01
556	0	.	3	AA	AA	GA	GG	AA	20	176.7	67.5	69.55	21.61	122	72	5	19	0.3	0.64	1.24	1.12
557	0	.	0	GA	GA	GA	GC	AG	22	187.1	73.7	78.3	21.05	114	61	4.5	21	0.4	0.72	1.51	1.87
558	1	0	3	GG	GA	GA	GC	AG	22	174.5	73.2	75.4	24.03	99	59	4.6	21	0.2	0.69	1.9	2.06
559	1	1	1	GA	GA	GA	GC	AG	21	157.4	54.3	64.6	21.91	102	62	4.8	38	2.6	1.14	2.37	1.68
560	1	0	0	GA	AA	GA	GG	AG	21	164.2	84.4	86.25	31.3	111	69	4.2	29	2	0.86	1.5	2.02
561	1	0	0	AA	AA	AA	GG	AA	27	165	60.5	71.2	22.22	109	73	4.6	63	0.4	0.77	2.02	2.87
562	1	0	1	GG	GG	GG	CC	GG	22	158.1	50.5	70.167	20.2	99	65	4.7	32	0.3	0.67	2.54	1.69
563	1	0	1	AA	GA	AA	GC	AA	20	160.5	44.1	64.567	17.11	97	59	4.1	21	0.7	0.76	1.79	1.62
564	1	0	0	GA	GA	GA	GC	AG	26	168.8	67.9	74.267	23.83	108	65	4.6	33	0.3	0.63	1.33	2.02
565	0	.	1	GG	GG	GG	CC	GG	22	171.9	70.1	79.25	23.72	125	70	5.1	23	10.2	0.77	1.39	1.7
566	0	.	0	AA	AA	AA	GG	AA	24	174.1	76.8	89.35	25.33	119	75	4.7	47	0.9	1.78	1.16	2.33
567	0	.	1	AA	AA	AA	GG	AA	26	160	53.4	68	20.85	121	76	4.7	20	0.2	1.21	1.48	1.91
568	0	.	1	GA	GA	GA	GC	AG	22	169	57.5	70.75	20.13	118	73	4.8	38	0.4	0.96	1.44	2.36
569	1	0	1	GG	GA	GA	GC	GG	21	157.5	56.1	71	22.61	113	74	.	48	1.9	0.75	1.76	2.83
570	1	0	0	GA	GA	GA	GC	AG	22	165.5	57.7	66.85	21.06	108	57	4.1	19	0.8	0.64	2.4	1.69
571	0	.	3	GA	GA	GG	GC	AG	25	173	60.5	73.15	20.21	134	64	5.4	39	0.3	0.64	1.07	3.15
572	0	.	1	GG	GG	GG	CC	GG	23	171.1	53.8	65.85	18.37	118	68	4.1	15	0.19	0.56	1.61	1.6
573	0	.	0	GA	GA	GA	GC	AG	28	169.3	71	83.9	24.77	141	76	4.4	13	1.1	0.66	1.26	2.09
574	0	.	0	GA	GA	GA	GC	AG	20	184	73.5	77.5	21.7	133	75	4.2	22	0.19	0.75	1.63	2.52
575	0	.	0	GG	GG	GG	CC	GG	26	180.3	85.6	85.45	26.33	130	69	4.2	39	0.3	0.69	1.19	1.81
576	0	.	0	GA	GA	GA	GC	AG	26	192.25	76.6	78	20.72	128	71	4.1	48	0.5	0.57	1.75	0.91
577	1	0	1	GA	GA	GA	GC	AG	22	157	54.3	70.2	22.02	119	69	3.9	17	0.19	0.67	1.69	1.53
578	1	0	0	GG	GG	GG	CC	GG	25	162.1	54.8	63.3	20.85	121	81	4.6	34	0.2	0.56	1.83	2.24
579	0	.	0	GA	GA	GA	GC	AG	25	177.3	82.5	88	26.24	133	74	5.1	54	0.5	0.77	1.24	2.65
580	1	0	3	GA	GG	GA	CC	AG	28	158.5	59	73.05	23.48	105	77	3.5	20	1.1	0.63	2.02	2.61
581	0	.	0	GG	GG	GG	CC	GG	24	171.5	78	84.133	26.51	122	60	4.7	20	0.2	0.55	1.39	1.22
582	1	0	2	AA	AA	AA	GC	AA	24	163.8	59.1	69.3	22.02	109	68	4.4	55	0.7	1.34	1.59	2.21
583	1	0	0	GG	GG	GG	CC	GG	26	167.5	61.1	69.133	21.77	99	58	4.1	39	0.8	0.58	1.41	1.31
584	1	1	0	AA	AA	AA	GG	AA	22	150.5	48.7	63.7	21.5	94	59	4.3	13	1	0.64	3.11	1.72
585	1	0	0	GA	GA	GA	GC	AG	22	154	57.4	78.8	24.2	104	62	4.5	.	0.7	0.92	1.35	2.47
586	1	0	1	GA	GA	GA	GC	AG	22	152.1	41.4	64.45	17.89	101	54	4.8	42	0.3	0.56	1.98	2.87
587	1	1	0	GG	GG	GG	CC	GG	26	169.1	56	67.15	19.58	131	94	4.7	55	0.9	0.56	2.38	1.84
588	1	1	0	AA	AA	GA	GG	AA	25	162	59.6	70.4	22.7	124	62	4.7	40	2.9	1.52	1.39	2.82
589	1	0	0	GA	GA	GA	GC	AG	26	173.1	56.3	67.167	18.78	111	67	4.5	27	21.6	0.96	1.46	1.64
590	1	0	0	GA	GA	GA	GC	AG	23	173.6	58.7	67.9	19.47	109	69	4.7	44	0.3	0.57	1.63	2.18
591	1	0	1	GA	GA	GA	GC	AG	22	160.15	51.9	67.4	20.23	112	59	3.7	27	0.2	0.75	2.01	2.21
592	1	0	1	AA	AA	AA	GG	AA	23	162.7	48.9	64.8	18.47	92	60	4.7	33	0.6	0.88	1.25	3.77
593	1	1	0	GA	GA	GA	GC	AG	22	156.5	56.1	70.5	22.9	116	63	4.5	32	8.1	0.92	2.26	1.23
594	1	0	0	GA	GA	GA	GC	AG	28	152.2	84.5	94.5	36.47	111	75	4.5	23	2.3	0.76	1.38	2.5
595	0	.	1	AA	AA	AA	GG	AA	26	182.1	73.8	76.2	22.25	112	72	4.3	13	0.19	0.44	1.76	1.49
596	0	.	2	GA	GA	GA	GC	AG	20	162.9	60.6	77.9	22.83	125	71	4.9	84	0.8	0.76	1.4	2.93
597	1	1	1	GG	GG	GG	CC	GG	20	161.3	47.7	62.133	18.33	110	80	5.2	88	0.4	0.62	1.84	1.53
598	1	1	1	GA	GA	GA	GC	AG	23	154	60.9	71.9	25.67	106	72	4.3	62	1.9	1.33	1.72	2.45
599	1	0	0	GA	GA	GA	GC	AG	23	161.95	51.6	65.9	19.67	110	72	4.6	26	0.4	0.67	2.24	1.94
600	1	1	0	AA	AA	AA	GG	AA	20	187.5	72.5	67.35	20.62	104	56	4.6	72	1.1	1.85	2.54	2.18
601	0	.	2	GG	GG	GG	CC	GG	23	185	72.1	74.35	21.06	121	66	5.1	39	0.3	0.73	1.68	1.39
602	0	.	0	GG	GG	GG	CC	GG	22	182.2	75.6	81.3	22.77	112	71	5	58	0.5	1.25	1.2	2.83
603	1	0	1	GA	GA	GA	GC	AG	23	153	49.4	64.8	21.1	104	65	4.6	28	0.19	0.98	1.89	1.59
604	1	1	0	AA	AA	AA	GG	AA	25	170.6	76.2	78.5	26.18	122	72	4.6	59	2.1	1.82	1.79	1.58
605	1	1	0	AA	AA	AA	GG	AA	27	175.1	64	68.45	20.87	91	60	4.4	18	1	1.13	1.64	2.51
606	1	0	1	GG	GG	GG	CC	GG	20	163.1	53.7	64.75	20.18	123	68	4.9	61	0.2	0.88	1.68	1.46
607	1	0	0	AA	AA	AA	GG	AA	23	170	70.5	74.45	24.39	117	78	4.9	32	0.9	0.61	2.13	3.04
608	1	1	1	GA	GA	GA	GC	AG	26	160.3	55.7	70.1	21.67	129	81	5	41	0.3	1.43	1.85	2.04
609	1	0	1	GA	GA	GA	GC	AG	22	165.6	73.2	80.7	26.69	118	74	4.7	47	0.6	1.45	1.71	3.03
610	0	.	0	GA	GA	GA	GC	AG	22	182.4	66.9	75.95	20.1	111	60	4.2	19	1.3	0.55	1.63	1.38
611	0	.	3	GA	GA	GA	GC	AG	22	174.9	79	84.1	25.82	133	70	5.7	157	2.7	0.72	1.08	1.61
612	1	0	0	GG	GA	GG	GG	GG	20	168.3	60.9	69.7	21.5	106	62	4.1	111	0.9	1.21	1.37	2.57
613	1	0	0	GG	GG	GG	CC	GG	21	171.05	68.3	75	23.34	121	70	4.8	44	0.4	0.98	1.69	1.86
614	1	1	0	GG	GG	GG	CC	GG	21	171.6	57.4	62.95	19.49	104	63	4.5	42	0.2	0.6	1.41	2.55
615	1	1	0	GG	GG	GG	CC	GG	22	160.9	52.3	65.9	20.2	118	73	4.3	28	2.4	1.08	2.05	2.6
616	1	1	2	GG	GA	GG	GC	GG	22	149.7	53.6	71.05	23.91	95	57	4.8	38	0.6	0.71	1.52	3.18
617	0	.	0	AA	AA	GA	GG	AA	25	171.3	63.2	72.4	21.53	134	83	5	27	0.19	0.94	2.17	1.28
618	1	0	3	GA	GA	GA	GC	AG	22	165.1	117.1	107.35	42.95	105	80	4.8	151	16.1	1.24	1.28	1.97
619	0	.	1	GA	GA	GA	GC	AG	23	156.4	59.7	79.5	24.4	111	73	4.7	37	0.7	1.9	1.27	2.33
620	1	0	2	AA	AA	AA	GG	AA	20	158.8	60.5	67	23.99	115	67	4.3	36	1.9	0.67	0.9	1.96
621	1	0	1	GA	GA	GA	GC	AG	23	167.7	57.6	64.55	20.48	119	59	4.4	49	0.19	0.84	1.94	2.37
622	0	.	0	AA	AA	GA	GG	AA	23	175	69.1	73.7	22.56	116	56	4.6	25	0.19	0.65	1.32	1.65
623	1	0	1	AA	AA	AA	GG	AA	20	152.5	53.2	67.85	22.87	108	65	4.2	35	0.3	0.62	2.32	1.78
624	0	.	1	AA	AA	AA	GG	AA	22	172.6	53.9	63.6	18.09	110	64	5.3	66	0.19	1	1.52	1.33
625	1	0	1	AA	AA	AA	GG	AA	23	156.4	56.7	68.95	23.17	103	66	4.3	25	0.2	0.72	1.53	2.19
626	0	.	0	AA	GA	GA	GC	AA	26	175.1	64.5	75.067	21.03	106	66	4.5	17	0.19	0.82	1.24	1.84
627	1	1	0	GA	GA	GA	GC	AG	22	171.3	66.4	70.3	22.62	132	75	4.8	108	1.7	1.89	1.56	2.49
628	0	.	1	AA	AA	AA	GG	AA	21	169.5	70.4	73.167	24.5	119	69	5.1	40	0.5	0.58	1.81	1.55
629	1	0	3	AA	AA	AA	GG	AA	20	158.1	53.9	68.65	21.56	100	62	4.5	38	0.2	0.96	1.49	2.41
630	1	0	0	GA	GA	GA	GC	AG	22	170.8	71.9	74.75	24.64	119	72	4.3	24	1.2	0.87	1.53	1.9
631	1	1	0	AA	GA	GA	GC	AA	26	160.7	48.8	66.35	18.89	113	64	4.5	22	0.19	0.54	1.58	2.55
632	1	1	0	AA	AA	AA	GG	AA	20	163	67.6	72.7	25.44	110	82	4.9	87	4.3	1.13	1.49	2.53
633	1	0	0	AA	AA	AA	GG	AA	26	153.7	48.4	65.3	20.48	99	54	5.1	18	0.2	0.7	1.09	2.55
634	1	0	0	GA	GA	GA	GC	AG	20	159.3	50.6	67.7	19.93	110	68	5.5	66	0.4	0.82	1.62	1.28
635	1	0	0	GA	GA	GA	GC	AG	27	163.7	58.2	68.5	21.71	112	67	5	42	0.3	0.7	1.73	1.85
636	1	0	3	GA	GA	GA	GC	AG	20	171.9	62.5	75.6	21.15	99	59	4.5	37	0.4	0.83	1.88	1.38
637	0	.	3	AA	AA	AA	GG	AA	20	183.4	61.6	64.8	18.31	117	70	5.4	15	0.19	0.6	1.89	1.39
638	0	.	1	AA	AA	AA	GG	AA	20	182.2	59.8	69.9	18.01	118	71	5.2	61	0.19	0.95	1.77	1.99
639	0	.	0	GA	GA	GA	GC	AG	21	179.5	80.2	81.75	24.89	121	58	4.7	21	0.19	0.44	1.01	1.55
640	0	.	0	GA	GA	GG	GC	AG	22	173.8	87.4	88.6	28.93	135	78	5.2	52	0.3	0.68	1.07	1.97
641	0	.	0	AA	AA	AA	GG	AA	20	178.2	68.5	76.85	21.57	122	62	4.5	41	0.19	0.78	1.65	1.89
642	1	0	1	AA	AA	AA	GG	AA	20	151.1	49.6	66.7	21.72	91	56	4.6	22	0.4	0.55	1.63	1.62
643	1	1	0	GA	GA	GA	GC	AG	24	168.5	89.2	87.65	31.41	118	69	4.5	32	7.5	1.76	1.78	2.97
644	0	.	0	GA	GA	GA	GC	AG	27	181.3	77.3	73.6	23.51	125	73	5.1	19	0.19	0.88	1.54	2.29
645	0	.	0	AA	AA	AA	GG	AA	21	179.4	83.5	87.867	25.94	125	61	5.1	60	0.2	1.37	1.37	2.15
646	1	0	1	AA	AA	AA	GG	AA	23	159.2	47.2	61.4	18.62	102	60	4.9	30	0.3	0.43	1.87	1.74
647	0	.	0	GA	GA	GA	GC	AG	25	183.2	95.6	91.8	28.48	120	83	4.7	22	0.6	1.29	1.05	2.31
648	1	0	0	AA	AA	AA	GG	AA	22	174.8	72.2	76.35	23.62	98	58	4	17	0.2	0.69	1.7	1.93
649	1	0	1	GA	GA	GA	GC	AG	23	152.6	51.1	64.95	21.94	98	64	4.8	47	0.6	0.69	1.73	1.99
650	1	0	1	AA	GA	AA	GC	AA	20	157.7	48.4	60.2	19.46	108	75	5.2	178	0.3	1.12	1.55	2.1
651	1	0	1	AA	AA	AA	GG	AA	21	168.6	67.2	72.5	23.64	115	71	5	39	0.2	0.58	2.36	1.56
652	1	0	0	AA	AA	AA	GG	AA	20	170.3	67.7	73.45	23.34	111	59	4.4	38	0.7	0.74	1.76	2.29
653	1	0	1	GA	GA	GA	GC	AG	26	156.7	50.4	65.25	20.52	109	64	4.6	15	0.19	0.63	2.47	2.07
654	1	0	1	GG	GA	GA	GC	GG	22	163.3	59.1	70.4	22.16	108	66	4.2	19	5	0.95	1.46	3.48
655	0	.	0	GA	GA	GA	GC	AG	24	183.4	90.9	95.65	27.02	149	78	5.2	40	0.4	1.03	1.46	2.98
656	1	1	2	GG	GG	GG	CC	GG	26	156.9	59.8	70.55	24.29	110	65	4.3	25	2	0.99	2.59	2.15
657	1	0	3	AA	AA	GA	GG	AA	23	171.7	88.4	90.3	29.98	108	56	4.9	108	1.2	0.8	1.13	2.34
658	0	.	0	GA	GA	GA	GC	AG	25	191.7	82.4	76.7	22.42	116	72	4.7	13	0.19	0.6	2.25	1.34
659	1	1	0	AA	AA	AA	GG	AA	20	158.7	52.6	69.95	20.88	105	61	4.8	75	0.4	1.27	1.16	2.15
660	0	.	1	GA	GA	GA	GC	AG	20	170.4	59.9	65.95	20.62	128	70	5.1	47	0.8	0.74	1.74	1.33
661	1	0	0	GA	GA	GA	GC	AG	20	162.4	61.7	78.8	23.39	122	84	5	37	1.3	0.41	1.75	2.06
662	1	0	0	AA	AA	AA	GG	AA	25	173.4	71.9	73.1	23.91	111	61	4.6	32	0.19	0.97	1.51	2.83
663	1	0	1	GG	GG	GG	GC	GG	21	166.2	66	82.8	23.89	123	83	5	87	0.2	8.55	.	.
664	0	.	3	GG	GG	GG	CC	GG	23	187.5	83.4	81.6	23.72	129	67	4.8	24	0.19	0.59	1.53	1.44
665	1	0	2	GG	GG	GG	CC	GG	26	159.7	69	78.85	27.05	102	79	4.6	49	1.7	0.55	1.59	1.75
666	1	0	3	AA	AA	GA	GC	AA	21	168.3	51.5	60.9	18.18	108	69	4.4	22	0.2	0.5	1.99	1.17
667	0	.	1	GA	GA	GA	GC	AG	20	161.4	50.4	64.35	19.34	109	71	5.3	35	0.7	0.65	2.24	2.06
668	1	0	2	GA	GA	GA	GC	AG	25	164.6	55.1	64.15	20.33	105	60	4.3	29	0.2	0.52	2.16	2.36
669	1	1	1	GG	GG	GG	CC	GG	20	161.3	53.3	65.55	20.48	113	71	4.6	108	0.8	1.35	1.63	2.17
670	0	.	3	GA	GA	GA	GC	AG	21	188.9	76	76.4	21.29	114	68	4.1	49	0.19	0.67	1.51	1.75
671	1	1	0	GA	GA	GA	GC	AG	21	157.9	50	65.15	20.05	120	74	5.5	54	1.9	1.07	1.79	2.12
672	1	0	0	GA	GA	GA	GC	AG	26	171.1	64.4	72.1	21.99	111	63	4.4	43	0.3	0.87	2.27	2.23
673	0	.	0	GA	GA	GG	GC	AG	20	184.5	69.5	76.35	20.41	145	76	5.2	46	0.19	1.06	1.15	2.44
674	1	0	0	GG	GG	GG	CC	GG	26	153.8	55.7	71.1	23.54	123	88	5	69	4	0.59	1.88	1.35
675	1	0	1	GA	GA	GA	GC	AG	20	171.8	62.5	73.15	21.17	109	71	4.5	65	0.3	0.96	1.85	3.1
676	0	.	1	GG	GG	GG	CC	GG	20	180.1	69.9	73.15	21.55	145	89	5.2	13	0.3	0.8	2.39	2.59
677	1	0	1	AA	AA	AA	GG	AA	20	160.75	56.8	70.85	21.98	104	65	4.3	31	0.8	0.72	1.21	2.42
678	1	1	0	AA	AA	AA	GG	AA	25	162.2	47.8	65.4	18.16	120	70	4.7	32	0.19	0.87	1.42	1.58
679	1	0	2	AA	AA	AA	GG	AA	28	154.7	54	67.65	22.56	113	75	4.9	51	0.6	0.78	1.76	1.65
680	1	0	0	GG	GG	GG	CC	GG	27	160.6	70.5	76.7	27.33	116	77	4.6	123	0.8	0.59	1.29	2.29
681	1	0	0	GA	GA	GA	GC	AG	21	168.1	72.4	69.3	25.62	117	66	4.7	39	0.6	0.75	1.53	1.91
682	1	0	3	AA	AA	GA	GG	AA	20	164.9	58.1	68.8	21.36	120	69	4.4	43	0.3	0.79	2.48	1.67
683	1	1	0	GG	GG	GG	CC	GG	22	167.8	61.8	72.65	21.94	110	59	4.4	37	0.3	0.49	1.92	2.16
684	1	0	2	AA	AA	AA	GG	AA	20	148.8	41.2	57.05	18.6	111	74	5	21	0.19	1.25	2.35	3.39
685	1	1	0	GA	AA	GA	GG	AG	22	164.4	58.1	71.4	21.49	94	59	4.7	27	1.4	1.65	1.87	2.9
686	1	1	0	AA	AA	AA	GG	AA	21	163.3	66	72.7	24.74	116	76	4.5	24	1.4	0.96	2.14	3.12
687	1	0	0	GA	GA	GA	GC	AG	20	161.5	62.3	69.4	23.88	112	73	4.8	54	0.8	0.32	1.42	1.26
688	1	0	0	AA	AA	AA	GG	AA	24	157.4	53.5	64.733	21.59	124	80	4.4	16	0.19	0.81	1.65	1.65
689	1	1	0	GA	GA	GA	GC	AG	22	161.3	60.4	71.45	23.21	95	69	4.5	37	1.8	1.3	2	3.06
690	1	0	0	GA	GA	GA	GC	AG	23	164.6	56.3	71.65	20.78	110	69	4.9	36	0.19	0.77	1.87	2.59
691	1	0	0	GG	GG	GG	CC	GG	24	163.5	62.9	73.6	23.52	104	58	4.6	39	0.6	0.7	1.17	2.06
692	1	1	0	GA	GA	GA	GC	AG	20	160.1	51.5	63.95	20.09	144	85	5.4	52	0.7	1.5	1.71	2.54
693	1	0	1	GA	GA	GA	GC	AG	25	164.3	54.2	69.8	20.07	107	59	4.9	25	0.9	0.75	2.12	2.17
694	1	0	1	GG	GG	GG	CC	GG	20	168	59.4	69.5	21.04	113	75	4.7	87	0.3	1.13	1.41	2.3
695	1	0	3	GA	GA	GG	GC	AG	21	180.4	64.8	67.067	19.91	128	83	5	59	0.19	0.88	2.09	1.58
696	1	0	0	GG	GG	GG	CC	GG	26	156	55.6	72.7	22.84	120	75	4.7	43	0.19	0.76	1.21	1.68
697	1	0	0	GG	GG	GG	CC	GG	21	164.1	76.7	77.6	28.48	114	68	4.1	21	0.7	0.92	1.29	1.92
698	1	0	0	GG	GG	GG	CC	GG	22	161.2	60.2	71.65	23.16	118	75	4.7	57	2.4	1.23	2.24	1.58
699	0	.	0	GG	GG	GG	CC	GG	23	192.5	107	93.65	28.87	129	72	4.5	27	0.3	0.56	0.88	1.46
700	0	.	0	GG	GG	GG	CC	GG	23	186.6	66.9	72	19.21	127	74	4.7	43	0.19	0.76	1.45	2.18
701	1	0	1	GG	GG	GG	CC	GG	21	148.9	50.2	69.65	22.64	106	66	5.2	52	0.19	1.29	1.98	2.55
702	1	1	1	GG	GG	GG	CC	GG	20	155.2	49	67.3	20.34	107	56	4.8	31	0.2	0.8	1.09	1.78
703	1	0	2	AA	AA	AA	GG	AA	22	162.2	59.7	69.2	22.69	117	62	4.8	80	0.9	0.88	1.33	3.13
704	1	1	0	GA	GA	GA	GC	AG	20	153.5	62.5	78.3	26.52	121	75	4.7	48	3.5	1.57	1.68	2.71
705	1	0	1	AA	AA	AA	GG	AA	21	153.8	46.3	64.4	19.57	103	60	4.1	19	0.19	0.84	1.86	3.05
706	1	1	2	GA	GA	GA	GC	AG	24	163.9	55.3	64.9	20.58	106	67	4.9	29	1.4	0.85	1.93	1.83
707	1	0	1	AA	AA	AA	GG	AA	20	158.3	55.5	72.25	22.14	106	66	5	46	0.2	0.8	1.32	1.97
708	1	0	1	GA	GA	GA	GC	AG	22	156.8	52.3	68	21.27	103	65	4.6	20	1	0.84	2.11	2.36
709	1	0	2	GG	GG	GG	CC	GG	20	169.5	66	71.4	22.97	98	61	4.5	54	0.8	0.7	1.76	1.74
710	1	0	0	GA	GA	GA	GC	AG	23	165.1	74.1	81.1	27.18	113	69	4.7	58	0.6	1.27	1.24	3.45
711	1	0	0	GG	GG	GG	CC	GG	29	157.3	55	73.1	22.22	111	66	5	40	1	1.45	1.7	2.62
712	1	1	0	GA	GA	GA	GC	AG	24	169.8	78	80.8	27.05	114	72	4.9	50	4.8	0.98	1.85	2.77
713	1	0	1	GG	GG	GG	CC	GG	20	154.5	55.8	80.15	23.37	105	61	5.1	53	2.4	2.12	1.24	3.63
714	1	0	3	GA	GA	GA	GC	AG	26	170	52.6	61.25	18.2	98	62	4.5	46	0.19	0.51	1.89	1.57
715	1	0	1	GA	GA	GA	GC	AG	20	163	48.7	62.4	18.32	108	72	5.2	35	0.19	0.64	1.97	3.03
716	0	.	1	GA	GA	GA	GC	AG	29	160.2	76.7	93.05	29.88	138	84	5.6	60	0.4	1.7	1.22	4.01
717	1	0	0	GA	GA	GA	GC	AG	25	169.4	61.9	70	21.57	111	74	4.5	67	0.19	0.84	1.51	1.61
718	1	1	1	GG	GG	GG	CC	GG	22	152.3	48.1	62.45	20.73	101	72	4.7	43	0.19	1.12	2.01	2.6
719	1	0	0	GA	GA	GG	GC	AG	20	168	60.3	74.4	21.36	113	57	4.5	31	0.9	0.98	1.61	1.73
720	1	0	0	GA	GA	GA	GC	AG	27	163.4	66.9	73.6	25.05	108	66	5.3	69	0.19	0.57	2.12	1.03
721	1	0	0	AA	AA	AA	GG	AA	22	166.2	67.2	74.15	24.32	118	67	4.6	53	0.6	0.79	1.98	3.21
722	1	1	3	AA	AA	AA	GC	AA	26	162.1	69.2	76.9	26.33	105	60	5.1	53	3.2	0.37	2.13	1.16
723	1	0	0	AA	AA	AA	GG	AA	21	170.7	76.5	79.95	26.25	117	61	4.6	52	0.5	1.76	1.56	2.69
724	1	1	3	GA	GA	GA	GC	AG	22	174.6	55.2	61.75	18.1	116	79	4.4	54	8.6	2.31	1.94	3.3
725	1	1	0	GA	GA	GA	CC	AG	20	178.4	74.2	73.5	23.31	111	68	4.8	13	1.2	1.09	1.83	0.74
726	1	0	1	GG	GG	GG	CC	GG	20	164.3	66.5	79.15	24.63	80	57	4.2	29	0.19	0.75	1.74	1.96
727	1	0	0	GA	GA	GA	GC	AG	22	156.3	53	67.1	21.69	109	65	4.3	25	0.19	0.83	2.19	1.97
728	0	.	2	GA	GA	GA	GC	AG	28	168	104.9	113.9	37.16	132	83	6.1	92	0.5	1.5	1.4	3.23
729	0	.	2	GA	GA	GA	GC	AG	27	166.2	63.4	75.2	22.95	121	71	4.8	57	0.7	0.75	1.05	1.53
730	0	.	0	GA	GA	GA	GC	AG	27	178.5	88.9	87.75	27.9	122	70	4.5	53	2.5	0.39	1.44	1.78
731	0	.	0	AA	AA	AA	GG	AA	22	176.9	59.2	72.45	18.91	129	75	4.3	18	0.19	0.62	1.24	2.01
732	0	.	2	GG	GG	GG	CC	GG	22	165.1	45.1	60.2	16.54	121	80	4.8	42	0.19	1.01	1.54	1.78
733	0	.	1	AA	AA	AA	GG	AA	23	171.1	71	78.7	24.25	139	70	4.8	37	0.19	0.51	1.58	0.98
734	0	.	1	GG	GG	GG	CC	GG	24	183	60.4	66.75	18.03	107	68	4.5	13	0.2	0.5	1.79	2.35
735	0	.	3	AA	AA	AA	GG	AA	20	172.4	65.7	74.633	22.1	124	65	4.9	48	0.6	1.74	1.02	1.87
736	0	.	0	GA	GA	GA	GC	AG	28	190	79	85.2	21.88	133	76	4.8	22	0.2	0.4	1.93	1.51
737	1	1	2	AA	AA	AA	GG	AA	22	161.3	73.6	89.55	28.28	111	76	4.4	105	4.9	1.48	1.38	3.61
738	1	1	3	AA	GA	GA	GC	AA	22	166	55.9	71.25	20.28	103	63	4.8	39	0.7	1.05	1.84	2.89
739	1	1	0	GA	GA	GA	GC	AG	22	178.4	72.8	74	22.87	104	69	4	54	0.9	0.64	2.21	2.63
740	1	0	0	GA	GA	GA	GC	AG	23	168.35	69.7	75.65	24.59	126	78	4.3	84	0.6	0.5	2.13	4.07
741	1	0	0	GA	GA	GA	GC	AG	21	156.5	87.1	98.25	35.56	123	89	5	73	1	1.37	1.23	2.41
742	1	0	1	AA	AA	AA	GG	AA	24	160.25	52.8	67.15	20.56	89	61	4.7	40	0.3	1.32	1.86	2.34
743	1	0	1	AA	GA	AA	GC	AA	24	162.1	54.2	66.2	20.62	108	74	4.4	13	0.3	0.33	3.01	1.41
744	1	0	0	AA	AA	AA	GG	AA	23	163.7	64.1	73.15	23.91	108	65	5	88	1.5	0.99	1.52	1.86
745	1	0	1	AA	AA	AA	GG	AA	21	162.5	56	70.15	21.2	118	67	4.7	83	0.19	1.27	1.5	1.99
746	1	0	1	GA	GA	GA	GC	AG	26	154.4	46	61.65	19.29	111	65	4.9	39	0.19	0.37	1.81	2.21
747	1	0	0	AA	AA	GA	GG	AA	24	165.3	59.7	70.5	21.84	121	73	3.9	110	0.2	0.54	1.4	2.37
748	1	0	0	GG	GG	GG	CC	GG	23	167.1	72.8	80.6	26.07	125	85	4.9	67	0.6	1.19	1.28	2.05
749	1	0	1	GA	GA	GA	GC	AG	20	163.6	66.4	76.95	24.8	120	68	4.8	46	0.2	1.02	1.16	1.74
750	1	0	1	GG	GG	GG	CC	GG	20	154.6	45.3	65.85	18.95	106	58	4.7	48	0.4	0.65	1.58	1.42
751	1	1	0	AA	AA	AA	GG	AA	28	168.8	57.8	69.45	20.28	108	68	4.8	100	2.1	0.69	2.55	2
752	1	0	1	GG	GG	GG	CC	GG	21	158.5	53.6	68.4	21.33	103	63	4.8	44	0.2	0.77	1.27	3.51
753	1	0	1	AA	AA	AA	GG	AA	20	162.9	59.5	65.35	22.42	106	62	4.5	17	1.1	0.51	1.76	1.64
754	1	0	2	AA	AA	AA	GG	AA	26	167.4	60.6	70.167	21.62	103	60	4.8	47	0.19	1.25	1.81	3.66
755	1	0	1	GA	GA	GA	GC	AG	21	153.9	51.6	68.8	21.78	104	66	4.7	39	0.19	1.34	1.64	2
756	1	1	0	AA	AA	AA	GG	AA	28	175	90	89.65	29.38	123	90	4.8	58	7.5	1.31	2.35	1.84
757	1	0	2	GG	GG	GG	CC	GG	20	160	48.8	62.5	19.06	103	63	4.7	34	1.2	0.44	1.31	1.91
758	1	0	1	GG	GG	GG	CC	GG	21	169.8	59.5	67.15	20.63	98	52	4.8	49	0.19	0.56	2.1	1.09
759	1	0	0	GG	GG	GG	CC	GG	22	162.1	56.1	68.533	21.34	105	60	4	26	0.4	0.74	1.74	2.63
760	0	.	0	GA	AA	GA	GG	AG	20	178.8	75.1	79.45	23.49	128	81	4.8	54	0.9	1.28	1.04	2.98
761	0	.	0	GA	GA	GA	GC	AG	23	170.2	57.9	73.8	19.98	131	79	4.5	17	0.5	0.46	1.18	2.05
762	0	.	1	GA	GA	GA	GC	AG	21	173.2	70.5	79	23.5	131	74	5.5	28	1.7	0.69	1.65	2.75
763	0	.	2	GA	GA	GA	GC	AG	20	169.2	63.9	72.5	22.32	119	62	5	44	0.2	1.59	1.09	3.32
764	1	0	1	GA	GA	GA	GC	AG	20	162.7	49.1	63.85	18.54	101	62	4.7	37	0.3	2.51	1.92	4.64
765	1	0	1	GG	GG	GG	CC	GG	24	165.9	48.7	64.5	17.69	102	51	4.4	37	0.19	0.29	1.9	.
766	1	0	3	AA	AA	AA	GG	AA	21	168	48.8	63.55	17.29	86	49	4.4	13	0.19	0.89	1.82	2.42
767	1	0	2	AA	AA	AA	GG	AA	20	147.5	47.2	61.6	21.69	105	68	4.9	87	1.3	0.41	2.01	2.34
768	1	0	0	GA	GA	GA	GC	AG	22	167.2	72.4	80.35	25.89	110	65	4.7	52	0.2	0.75	1.92	2.04
769	0	.	1	AA	AA	AA	GG	AA	22	174.6	81	86.65	26.57	144	77	4.9	45	2	0.81	1.25	2.78
770	0	.	0	GA	GA	GA	GC	AG	22	175.3	79.7	78.1	25.93	133	70	5	23	1.2	0.65	1.51	2.54
771	0	.	0	AA	AA	AA	GG	AA	21	178.8	66.7	76.45	20.86	121	69	4.5	22	0.19	0.88	1.68	2.83
772	1	0	0	GG	GG	GG	CC	GG	21	166.65	51.4	60.6	18.5	110	74	4.6	65	0.2	0.53	1.64	1.7
773	0	.	1	GA	GA	GA	GC	AG	20	170	66.7	79.7	23.07	117	71	4.6	57	0.3	0.81	1.08	3.08
774	0	.	2	GG	GG	GG	CC	GG	20	179.1	81.7	80.7	25.47	129	78	4.4	40	0.2	0.55	1.5	2.52
775	1	0	1	AA	AA	AA	GG	AA	21	162.6	61.9	72.25	23.41	100	61	4.4	53	0.3	1.15	1.42	2.84
776	0	.	1	GA	GA	GA	GC	AG	24	170.8	69.9	74.95	23.96	116	69	4.9	28	0.6	0.59	1.33	2.64
777	0	.	0	GA	GA	GA	GC	AG	20	172.6	69.8	76.3	23.43	135	81	5.1	41	0.19	0.53	1.18	1.66
778	0	.	1	AA	AA	AA	GG	AA	22	180.2	76	82.65	23.4	119	68	4.9	64	0.4	1.08	1.13	1.79
779	1	0	1	GA	GA	GA	GC	AG	20	164.1	45.8	63.6	17	95	61	4.3	42	0.19	0.79	2.05	2.93
780	1	0	0	GG	GG	GG	CC	GG	21	166.5	51.1	60.95	18.43	103	62	5	38	0.19	0.51	1.95	1.73
781	1	0	1	GA	GA	GA	GC	AG	20	160.1	66.9	75.6	26.1	97	60	4.6	85	0.19	0.51	1.32	2.17
782	1	0	1	GA	GG	GA	CC	AG	24	159.6	51.4	62.95	20.17	87	60	4.8	62	0.2	0.8	1.83	2.2
783	1	0	1	GG	GG	GG	CC	GG	26	158.8	41.4	59.25	16.41	93	57	4.7	16	0.19	0.4	2.3	1.72
784	1	1	0	GA	GA	GA	GC	AG	22	157.2	49.9	68	20.19	106	65	5	43	0.4	1.27	0.87	2.64
785	0	.	3	AA	AA	GA	GG	AA	22	178.7	71.4	74.5	22.35	116	73	5.3	13	3.9	0.66	1.47	2.39
786	1	1	1	AA	AA	AA	GG	AA	27	163.1	62.9	71.45	23.64	116	74	4.7	46	3.3	1.05	1.78	2.97
787	1	1	0	GG	GG	GG	CC	GG	27	160.85	70.2	85.2	27.13	93	65	4.2	57	1.5	1.54	1.57	2.63
788	1	1	0	GG	GG	GG	CC	GG	21	167.1	71.3	73.7	25.53	107	66	4.2	13	1.8	0.74	1.68	3.34
789	1	1	0	GA	GA	GA	GC	AG	23	159.8	52.9	65.3	20.71	113	71	4.2	46	1.1	1.3	1.6	3.11
790	0	.	1	GA	GA	GA	GC	AG	23	184.3	94.5	90.75	27.82	123	66	5.2	69	1	0.83	1.33	2.16
791	1	0	1	GA	GA	GA	GC	AG	23	162.8	58.7	71.05	22.14	115	72	4.9	51	0.5	1.07	1.54	2.05
792	1	0	1	AA	AA	AA	GG	AA	21	173.8	57.8	66.1	19.13	98	62	5	58	0.19	0.74	1.32	1.58
793	1	0	0	GA	GA	GA	GC	AG	29	157.65	50.7	64.3	20.39	99	61	5.1	29	0.3	0.77	1.58	2.15
794	1	0	2	GG	GG	GG	CC	GG	20	157.3	66.6	76.55	26.91	99	73	4.1	45	2.6	0.55	1.12	2.52
795	1	0	1	GA	GA	GA	GC	AG	20	150.5	45.1	61.8	19.91	114	72	4.4	91	0.8	0.84	1.35	2.17
796	1	1	0	GG	GG	GG	CC	GG	24	153.6	43.6	60.85	18.48	121	81	4.7	32	0.2	0.74	2.33	2.1
797	0	.	1	AA	AA	AA	GG	AA	21	164	65.3	79.75	24.27	130	69	5.2	44	0.6	2	1.18	2.54
798	0	.	0	AA	AA	AA	GG	AA	25	186.8	80.7	80.35	23.12	140	73	5.1	44	0.19	1.41	1.19	3.44
799	0	.	0	AA	AA	AA	GG	AA	22	170.9	67.8	70.55	23.21	123	65	4.8	30	0.19	0.59	1.32	2.16
800	0	.	2	GA	GA	GA	GG	AG	21	184.4	79.6	79.5	23.4	122	66	5.2	37	1.2	0.67	1.32	2.66
801	0	.	2	GA	GA	GA	GC	AG	21	166.2	60.2	75.75	21.79	134	85	5.6	67	1.3	2.07	0.82	4.58
802	0	.	2	AA	AA	AA	GG	AA	22	181.9	67.5	75.05	20.4	111	63	5.1	54	27.5	1.05	0.81	1.59
803	1	1	0	GA	GA	GA	GC	AG	20	160.8	58.1	69.05	22.47	107	64	4.4	51	3	0.48	3.96	2.4
804	1	1	1	GG	GG	GG	CC	GG	25	168.9	61.7	80.533	21.62	96	56	4.7	31	1.7	1.7	2.08	2.51
805	1	0	1	GA	GG	GG	CC	AG	20	163.3	50.6	64	18.97	104	68	4.7	27	0.19	0.63	2.42	2.24
806	1	0	0	GA	GA	GA	GC	AG	29	159.6	52.6	65.85	20.64	98	64	4.6	40	0.19	0.29	2.53	.
807	1	0	2	GG	GG	GG	CC	GG	25	163.5	51	70.1	19.07	100	69	4.8	68	0.2	0.67	1.4	2.52
808	0	.	2	GG	GG	GG	CC	GG	20	163.1	58	70.55	21.8	119	70	4.6	65	0.2	0.79	1.33	2.16
809	0	.	1	GG	GG	GG	CC	GG	20	179.9	71.4	72	22.06	118	63	5	35	0.19	0.91	1.4	1.89
810	0	.	0	GG	GG	GG	CC	GG	26	176.55	84.4	92.15	27.07	117	75	5.4	60	1.7	1.74	1.07	2.72
811	1	1	0	GA	GA	GA	GC	AG	26	164.4	58.1	72	21.49	123	74	4.7	58	4.2	1.36	3.24	2.1
812	1	0	0	AA	AA	AA	GG	AA	27	164.6	58.1	71.95	21.44	131	104	4.7	39	2	0.53	1.43	2.56
813	1	0	1	GA	GA	GA	GC	AG	23	154.8	58.8	74.95	24.53	109	63	4.4	26	0.3	0.74	1.16	1.59
814	1	0	1	GA	GA	GA	GC	AG	21	156	65.4	77.5	26.87	120	75	4.7	50	0.9	1	1.38	2.73
815	1	1	0	GG	GG	GG	CC	GG	20	160	84.5	98.3	33	130	86	4.6	121	5	0.96	1.57	2.94
816	0	.	0	GA	GA	GA	GC	AG	24	178.9	68.9	75.4	21.52	141	71	4.8	60	0.5	0.82	1.52	1.76
817	0	.	0	GA	GA	GA	GC	AG	24	183.8	63.7	73.95	18.85	129	71	4.7	29	0.9	1.13	1.66	2.41
818	0	.	1	GA	GA	GA	GC	AG	20	182.2	76.9	74.7	23.16	135	72	4.9	33	1	1.15	1.17	2.25
819	1	0	1	GG	GG	GG	CC	GG	20	162.8	48	63	18.11	108	62	4.6	66	0.19	0.82	1.7	1.95
820	1	1	0	AA	AA	AA	GG	AA	23	171.35	77.6	84.3	26.42	115	78	4	47	0.4	1.23	1.54	2.1
821	1	0	0	GA	GA	GA	GC	AG	27	166	53	62.9	19.23	120	75	4.7	43	0.19	0.63	1.33	1.62
822	1	1	0	AA	AA	AA	GG	AA	24	180.3	74	76.8	22.76	118	77	4.4	70	7.2	1.12	1.23	3.38
823	1	0	0	AA	AA	AA	GG	AA	21	174.5	71.7	77.9	23.54	140	91	5.4	85	0.7	0.67	1.27	1.78
824	1	1	2	AA	AA	GA	GG	AA	21	171.6	68.9	73.7	23.39	113	71	4.8	78	2.6	1.53	2.04	1.78
825	1	1	0	GA	GA	GA	GC	AG	20	159.4	54.3	68.05	21.37	119	83	4.6	71	1.3	1.55	1.47	2.32
826	1	0	0	GA	GA	GA	GC	AG	23	162.3	48.5	70.15	18.41	107	71	5.2	87	0.19	2.07	1.62	1.86
827	1	0	0	AA	AA	AA	GG	AA	23	163.25	55.6	67.55	20.86	101	61	4.4	13	0.19	0.54	1.79	1.26
828	0	.	1	GG	GG	GG	CC	GG	22	167.7	51.5	69.2	18.31	107	66	4.8	42	0.2	1.32	1.25	2.77
829	1	0	1	AA	AA	AA	GG	AA	22	168.4	66.8	75.65	23.55	115	74	4.6	59	0.19	1.16	2.03	1.64
830	1	0	2	GG	GG	GG	CC	GG	22	157.8	66.4	78.767	26.66	109	67	4.1	38	0.9	0.51	1.45	1.96
831	1	0	0	AA	AA	AA	GG	AA	23	162.4	44.2	62.5	16.75	105	66	4.9	18	0.19	1.02	1.61	2.36
832	0	.	0	GG	GG	GG	CC	GG	29	181.3	93.4	96.2	28.41	139	88	4.8	35	1.8	0.74	1.83	3.33
833	0	.	0	GG	GG	GG	CC	GG	20	189.1	71	73.9	19.85	113	63	4.8	49	0.3	1.16	0.94	2.47
834	0	.	0	GG	GG	GG	CC	GG	26	167.5	90.5	100.6	32.25	125	79	5	82	0.4	2.15	1.03	3.52
835	1	0	2	AA	AA	AA	GG	AA	20	150.1	67	77.25	29.73	107	76	5.1	97	1	0.94	1.15	1.89
836	1	1	3	AA	AA	GA	GG	AA	29	169.2	60.9	69.6	21.27	107	71	4.2	24	4.5	1.43	2.27	1.58
837	1	1	0	GG	GG	GG	CC	GG	21	158.6	59	69.3	23.45	107	65	4.8	44	0.3	1.07	1.68	2.3
838	1	0	1	GA	GA	GA	GC	AG	21	163.35	59.1	72.4	22.14	93	56	5.1	36	0.9	0.47	1.48	2.17
839	1	1	0	GA	GA	GA	CC	AG	21	163.9	60.5	69.45	22.52	114	75	4.2	48	1.2	0.75	3.4	1.05
840	1	0	1	AA	GG	GA	CC	AA	23	179.8	71.2	74.65	22.02	97	62	4.5	84	0.19	2.4	1.29	1.53
841	1	1	0	AA	AA	AA	GG	AA	26	155.05	48.4	64.75	20.13	120	73	4.2	40	1.5	0.49	1.56	2.81
842	0	.	0	GA	GA	GA	GC	AG	20	180.5	78.5	83.05	24.09	133	74	5	42	0.19	0.97	1.4	3.26
843	0	.	0	AA	AA	AA	GG	AA	23	190.5	127.9	110.55	35.24	118	75	5	83	2.5	1.32	1.1	2.27
844	0	.	0	GG	GG	GG	CC	GG	22	175.2	64.4	71.6	20.98	118	64	4.6	31	0.19	0.69	1.32	1.8
845	0	.	0	GG	GA	GG	GC	GG	22	176	69.1	73.8	22.3	129	67	5.1	44	0.19	0.77	1.17	1.73
846	0	.	2	GA	GA	GA	GC	AG	20	157.6	60.4	75.4	24.31	120	67	5	78	6.7	0.66	1.05	2.13
847	0	.	3	GA	GA	GA	GC	AG	23	172.1	77.9	84.267	26.3	131	64	4.6	31	0.9	0.67	1.7	2.88
848	0	.	0	GA	GA	GA	GC	AG	26	182	71.4	80.45	21.55	122	77	4.5	31	0.19	0.7	1.51	3.15
849	0	.	3	AA	AA	GA	GC	AA	22	184.4	72.4	78.8	21.29	120	74	4.6	42	0.4	0.48	1.78	1.51
850	0	.	1	GA	GA	GA	GC	AG	28	177.8	83.1	91.15	26.28	129	74	4.8	47	0.2	0.63	1.29	1.84
851	0	.	0	GG	GG	GG	CC	GG	27	193.1	85.6	87.15	22.95	125	72	4.6	59	0.3	0.68	0.98	2.9
852	0	.	0	AA	AA	AA	GG	AA	23	186.6	108	97.9	31.01	131	64	4.5	32	0.6	0.8	1.34	2.17
853	0	.	1	GG	GG	GG	CC	GG	20	176.6	69.5	73.65	22.28	129	78	5.2	30	0.19	0.66	1.69	2.34
854	0	.	2	GA	GA	GA	GC	AG	24	188.1	87.5	84.7	24.73	121	82	4.9	58	0.4	0.77	1.45	1.83
855	1	0	1	GA	GA	GA	GC	AG	20	159.4	44	59.4	17.31	98	62	4.4	51	0.19	0.92	1.15	2.05
856	1	0	1	GA	GA	GA	GC	AG	21	160.8	75	87.7	29	129	87	4.5	13	1.2	1.32	1.49	1.72
857	1	1	0	GG	GG	GG	CC	GG	27	166.1	57	70.7	20.66	100	66	4.1	25	0.4	0.45	1.93	2.25
858	1	0	0	GA	AA	GA	GG	AG	20	170.1	63.6	74.1	21.98	118	79	4.5	21	0.6	0.53	0.93	2.87
859	1	0	1	GA	GA	GA	GC	AG	22	156.5	49.4	64.8	20.16	106	67	4.5	29	0.3	0.84	1.64	2.29
860	1	1	3	GA	GA	GA	GC	AG	23	164.5	62.2	72.2	22.98	121	80	4.7	63	6.6	2.12	1.94	2.05
861	1	0	0	AA	AA	AA	GG	AA	23	161.6	74.7	80.3	28.6	122	71	4.9	98	0.6	0.9	1.23	2.45
862	1	0	0	GA	GA	GA	GC	AG	22	158.7	52.8	66.25	20.96	106	61	4.4	59	1.3	0.92	1.72	3.05
863	1	0	2	GG	GG	GG	CC	GG	20	158.4	48.3	68.5	19.25	112	78	5.4	93	0.2	0.59	2.01	1.93
864	1	1	1	GG	GG	GG	CC	GG	24	170.5	63.8	71.25	21.94	107	76	4.9	84	0.3	2.18	1.72	1.77
865	1	1	0	GG	GG	GG	CC	GG	26	155.5	51.6	68.5	21.33	100	64	4.2	32	3.3	1.21	1.75	1.84
866	1	1	0	GG	GG	GG	CC	GG	28	167.1	54.7	63.1	19.58	105	71	4.2	93	5	0.45	2.14	2.6
867	1	1	0	GA	GG	GA	CC	AG	24	162.6	58.9	66.3	22.27	115	79	4.7	40	2.3	0.85	1.93	3.55
868	1	0	0	GA	GA	GA	GC	AG	21	174.4	70.8	73.8	23.27	104	65	4.8	30	0.5	0.44	1.84	1.81
869	0	.	0	AA	AA	AA	GG	AA	24	172.5	91	95.75	30.58	134	77	4.6	68	0.9	0.39	1.37	0.95
870	0	.	1	GG	GG	GG	CC	GG	20	174.8	62.4	75.15	20.42	122	83	4.2	16	0.19	0.78	1.38	1.39
871	0	.	0	GG	GG	GG	CC	GG	28	172.6	72.6	82.4	24.36	118	61	4.6	23	1.7	1.29	1.31	1.77
872	0	.	0	GA	GA	GA	GC	AG	21	171.3	51.5	62.9	17.55	118	75	4.6	50	0.19	0.93	1.13	1.15
873	0	.	2	GA	GA	GA	GC	AG	21	169.9	63.3	74.1	21.92	124	68	4.7	26	0.5	1.3	1.17	3.75
874	1	0	0	GG	GG	GG	CC	GG	21	169.7	70.8	76.95	24.58	95	53	4.8	22	0.4	1.25	1.54	1.62
875	1	0	0	GG	GG	GG	CC	GG	24	158.7	46.8	62.4	18.58	95	68	4.2	31	0.2	0.52	1.91	2.75
876	1	1	0	GA	GA	GA	GC	AG	26	166.2	68	76.25	24.61	112	70	5.1	51	0.5	0.7	1.36	2
877	1	0	1	GG	GG	GG	CC	GG	20	163	48.9	61.25	18.4	101	64	4.3	40	0.19	0.68	2.13	2.49
878	1	1	0	GA	GA	GA	GC	AG	20	163.7	79.5	77.05	29.66	91	60	4.6	42	1.2	0.88	1.72	2.24
879	1	0	0	GA	GA	GG	GC	AG	26	162.5	53.4	69	20.22	94	56	4.4	43	0.3	0.4	1.83	2.18
880	1	0	3	GG	GA	GG	GC	AG	25	162.4	60	69.15	22.74	110	63	4.5	15	1.2	0.47	1.44	1.64
881	1	1	0	AA	AA	AA	GG	AA	22	166.2	56.3	69.5	20.38	103	69	4.8	18	3.4	1.78	1	2.98
882	1	1	0	GA	GA	GA	GC	AG	21	167.5	52.6	64.85	18.74	119	68	4	13	0.9	0.85	1.4	1.87
883	0	.	1	GA	GA	GA	CC	AG	23	176.8	57	66.7	18.23	108	60	4.5	26	0.6	0.54	1.88	1.88
884	0	.	0	GA	GA	GA	GC	AG	23	178.7	72.3	84.75	22.64	121	68	4.6	20	0.19	1.24	1.14	3.27
885	0	.	0	GA	AA	GA	GG	AG	21	181.3	78.4	78.35	23.85	129	63	5	32	0.2	1.46	1.5	1.84
886	1	0	2	AA	AA	AA	GG	AA	20	158.5	82.3	88.45	32.75	121	87	5	94	4.2	2.32	0.99	1.74
887	1	1	0	GA	GA	GG	GC	AG	24	164.6	58.2	68.65	21.48	132	85	4.8	34	3.1	1.16	1.56	4.06
888	1	0	0	AA	AA	AA	GG	AA	23	169.8	59	67.75	20.46	112	67	4.2	44	0.4	0.77	2.77	2.38
889	1	1	0	GG	GG	GG	CC	GG	22	164.3	62.1	68.3	23	125	70	4.3	39	1.4	1.76	1.83	2.33
890	1	1	0	GG	GG	GG	CC	GG	26	167.1	73.5	75.2	26.32	113	76	4.4	28	7.2	0.55	1.45	2.8
891	1	1	0	GA	GA	GA	GC	AG	20	158.5	63.8	69.5	25.39	117	77	4.4	63	4.8	1.05	1.77	1.95
892	1	1	0	AA	AA	AA	GG	AA	20	182	63	64.35	19.01	118	65	4.7	54	3	1.88	1.43	1.92
893	1	0	1	AA	AA	AA	GG	AA	20	159.5	45.3	57.85	17.8	113	74	4.8	49	0.19	0.81	1.55	1.51
894	1	1	3	GA	GG	GA	CC	AG	23	152.9	49	67.45	20.95	100	62	4.4	29	1.1	1.51	2.1	2.27
895	1	1	0	AA	AA	AA	GG	AG	24	161.3	56.5	71.9	21.71	109	60	4.3	101	0.8	1.34	1.25	2.13
896	1	0	0	GA	GA	GA	GC	AG	20	163.8	55.2	66.6	20.57	106	66	4.2	13	0.19	1.03	1.86	1.29
897	1	0	2	GG	GG	GG	CC	GG	22	160.5	74.8	79.05	29.03	114	67	5.1	65	2.2	1.03	1.4	2.85
898	1	0	0	GG	GG	GG	CC	GG	20	173.6	80.1	76.75	26.57	109	61	4.9	50	1.6	1.26	1.65	2.3
899	1	0	1	GA	GA	GA	GC	AG	20	159	60.9	71.4	24.08	112	63	4.8	21	0.5	0.19	2.08	1.36
900	1	1	0	GA	GA	GA	GC	AG	23	161.8	53.9	73.3	20.58	112	76	4.8	68	0.4	0.64	1.67	2
901	0	.	0	GA	GA	GA	GC	AG	28	176	91.8	85.85	29.63	127	64	4.8	27	0.2	0.76	1.24	1.61
902	0	.	2		GA	GA	GC	AG	26	166.4	83.6	89.733	30.19	127	81	5.3	100	0.7	0.89	1.24	2.28
903	0	.	1	GG	GG	GG	CC	GG	26	165.8	68.9	82.65	25.06	125	84	5.1	67	0.6	2.57	0.94	2.68
904	0	.	1	GA	GA	GA	GC	GG	22	173.7	98.7	100.5	32.71	134	77	5.2	85	1.1	1.16	1.22	3.35
905	1	1	0	GA	GA	GG	GC	AG	22	162	68.6	79.25	26.13	110	68	4.6	41	1.5	0.9	1.93	2.87
906	1	0	1	GG	GG	GG	CC	GG	20	159	62.2	72.5	24.6	95	64	5	68	1	1.26	1.5	2.46
907	1	0	1	GG	GG	GG	CC	GG	23	159	56.8	65.25	22.46	123	86	4.7	35	2.2	0.83	2.21	2.97
908	1	0	0	GG	GG	GG	CC	GG	20	160.4	58.2	67.4	22.62	111	62	4.7	57	0.19	0.8	1.14	1.43
909	1	0	3	AA	AA	GA	GG	AA	21	167.2	82.7	92.65	29.58	107	76	4.8	36	3.3	0.33	1.61	1.91
910	1	0	3	GA	GA	GG	CC	AG	21	166.9	64.5	70.75	23.15	113	66	4.2	36	0.3	0.27	1.54	2.25
911	0	.	1	GG	GG	GG	CC	GG	20	164.4	68.2	75.7	25.23	130	68	4.6	52	0.2	1.4	1.38	2.27
912	1	0	0	AA	AA	AA	GG	AA	21	173	66.8	74	22.31	122	77	5.2	47	0.4	0.67	2.01	2.28
913	1	1	0	GA	GA	GA	GC	AG	25	172.7	62.3	70.25	20.88	123	71	4.9	71	1.5	1.24	1.29	2.29
914	1	0	1	GG	GG	GG	CC	GG	20	152.9	45.5	63.85	19.46	107	67	4.6	45	0.6	1.35	1.2	1.6
915	1	1	0	GA	GA	GA	GC	AA	20	169.8	53.6	63.75	18.59	107	73	4.3	144	2.4	1.54	2.01	0.78
916	1	0	1	GA	GA	GA	GC	AG	20	159	50.3	69.25	19.89	103	68	4.2	13	0.19	0.49	1.56	2.98
917	1	1	0	GA	GA	GA	GC	AG	23	173.2	76.1	86.4	25.36	109	68	4.9	108	5.4	1.31	1.29	2.15
918	1	1	1	GG	GG	GG	CC	GG	25	155.4	54	68.25	22.36	114	74	4.8	21	19.2	0.57	1.34	2.79
919	1	0	0	AA	AA	AA	GG	AA	23	163.8	107.3	108.95	39.99	131	86	4.7	108	24.3	0.58	1.17	2.35
920	1	0	3	GA	GA	GA	GC	AG	22	152	44.2	63.05	19.13	113	76	5.1	23	0.19	0.79	1.22	1.58
921	1	0	0	GG	GG	GG	CC	GG	23	169.3	71.7	79.5	25.01	123	70	4.2	22	0.2	0.49	2.36	0.52
922	1	1	3	AA	AA	AA	GG	AA	23	167	55.3	66	19.82	116	69	5	21	0.19	1.04	2.04	2.12
923	1	1	0	AA	AA	AA	GG	AA	28	159.8	57.6	70.6	22.55	119	79	4.8	29	0.7	0.76	1.94	3.21
924	1	0	0	AA	AA	AA	GG	AA	20	164.5	66	75.15	24.39	126	86	4.5	31	0.2	0.48	2.21	2.55
925	1	1	0	GA	GA	GA	GC	AG	24	167.2	56.2	64.45	20.1	106	64	4.5	21	0.19	1.22	1.35	1.49
926	1	0	0	AA	GA	GA	GC	AA	20	161.2	52.7	64.25	20.28	112	76	5	71	0.3	0.66	1.39	2.12
927	1	1	3	AA	AA	AA	GG	AA	22	158.7	64.4	79	25.57	125	70	4.8	50	3.5	0.87	1.35	2.43
928	0	.	0	GA	AA	GA	GG	AG	23	183.5	75.1	78.95	22.3	128	70	5.2	39	0.2	1.04	1.47	1.52
929	0	.	0	GA	GA	GA	GC	AG	24	187.8	84.2	82.75	23.87	138	74	5.2	20	0.7	1.07	1.6	1.59
930	0	.	3	AA	AA	AA	GG	AA	20	175	76.9	83.3	25.11	140	63	4.9	44	0.3	0.49	1.21	1.6
931	0	.	1	GG	GG	GG	CC	GG	20	170.2	88.4	97.2	30.51	115	60	4.4	59	0.6	0.61	1.04	2.28
932	1	0	2	GG	GG	GG	CC	GG	20	153.4	71	85.9	30.17	120	75	5.7	175	6.4	0.98	1.59	2.24
933	1	0	0	GA	GA	GA	GC	AG	21	182	79.2	79.85	23.91	122	69	4.9	31	0.3	1.09	1.86	2.2
934	1	0	0	AA	AA	AA	GG	AA	23	168.6	68.6	73.9	24.13	120	81	4.6	19	0.6	0.77	1.17	2.06
935	1	1	1	GA	GA	GA	GC	AG	21	163.2	54.9	69.7	20.61	119	66	4.6	13	4.8	1.07	1.92	3.09
936	1	0	3		GG	GG	CC	GG	24	161.7	47.6	63.6	18.2	100	67	5	50	0.9	0.47	1.77	2.6
937	0	.	0	AA	AA	AA	GG	AA	27	172.3	65.5	76.85	22.06	123	76	4.9	46	0.7	0.54	1.53	2.08
938	0	.	0	AA	AA	AA	GG	AA	20	174.5	65.1	78.8	21.37	113	74	5.1	34	0.19	0.78	1.26	2
939	0	.	1	GA	GA	GA	GC	AG	20	177.6	70.4	78.7	22.31	106	61	4.6	35	0.19	1.34	1.08	2.44
940	0	.	0	GA	GA	GA	GC	AG	21	162.7	69.5	81.35	26.25	142	62	4.8	32	0.19	0.8	1.38	2.19
941	1	0	2	GG	GG	GG	CC	GG	22	155.1	72.1	79.15	29.97	114	78	4.9	78	18.1	0.67	1.15	2.29
942	1	0	3	GG	GG	GG	CC	GG	20	152.4	43.9	59.1	18.9	97	69	3.9	22	0.19	0.97	2.19	3.29
943	1	0	0	AA	AA	AA	GG	AA	24	165.3	59.8	75.05	21.88	100	59	4.8	31	0.19	0.61	1.37	2.39
944	1	0	0	GG	GG	GG	CC	GG	23	170	64.5	73.667	22.31	117	71	4.3	15	0.8	0.83	1.4	1.99
945	1	1	0	GG	GG	GG	GC	GG	23	173.1	60.9	72.2	20.32	112	67	4.6	69	2.9	1.86	2.39	3.18
946	1	1	0	GG	GG	GG	CC	GG	25	166	71.8	74	26.05	107	67	4.9	46	4.2	0.89	1.58	2.08
947	1	1	0	GA	GA	GA	GC	AG	22	163.3	51.6	66.1	19.34	102	63	4.8	64	2.3	1.7	1.36	2.19
948	1	1	0	AA	AA	AA	GG	AA	22	163.5	62.1	74.9	23.23	118	73	4.7	15	4.8	1.8	1.53	2.53
949	1	0	0	AA	AA	AA	GG	AA	26	166.5	64.2	71.4	23.15	110	67	4.4	32	0.3	0.49	1.29	2.19
950	1	0	2	GA	GG	GG	CC	AG	22	148.5	45.9	65.3	20.81	105	65	5.3	63	0.4	0.62	1.55	2.06
951	1	0	2	GA	GA	GA	GC	AG	21	152.5	61.8	82	26.57	101	64	5.1	60	6	0.78	1.35	2.31
952	1	0	2	GA	GA	GA	GC	AG	23	163.6	51.7	68.85	19.31	103	73	4.9	95	0.19	0.93	1.31	3.31
953	1	0	0	GA		GA	GC	AA	26	176	79.2	82.633	25.56	122	78	4.6	60	0.7	0.96	1.19	2.37
954	1	1	1	GA	GA	GA	GC	AG	20	160	50.7	65.25	19.8	104	61	4.8	66	1.4	2.17	1.96	1.69
955	1	0	0	GA	GA	GA	GC	AG	21	166.2	60.7	73.85	21.97	112	66	4.8	13	0.3	0.52	1.79	2
956	0	.	0	GG	GG	GG	CC	GG	22	172.3	73	80.15	24.58	112	68	4.9	30	0.19	0.83	1.29	2.29
957	0	.	0	AA	GA	AA	GC	AA	20	183.6	91.2	91.45	27.05	132	82	5	57	1.8	2.14	1.68	2.94
958	0	.	0	GG	GG	GG	CC	GG	20	179.9	61	69.1	18.84	118	77	5.2	61	0.19	0.96	1.07	1.76
959	0	.	0	GA	GA	GA	GC	AG	21	171	74.6	82.8	25.51	117	71	4.5	52	3.8	0.64	1.09	1.63
960	1	1	0	GA	GA	GA	GC	AG	21	163.1	61.4	73.8	23.08	110	65	4.2	31	0.5	0.94	1.36	1.93
961	1	0	1	AA	AA	AA	GG	AA	21	154.5	52	70.9	21.78	104	62	4.8	31	0.19	2.21	1.58	2.64
962	1	0	0	GA	GA	GA	GC	AG	21	170.5	74.6	83	25.66	119	73	4.6	34	0.8	0.65	2.09	1.99
963	1	0	0	GA	GA	GA	GC	AG	23	164.4	58.9	72.2	21.79	104	66	4.6	32	1	1.52	1.99	2.4
964	1	0	1	GA	GA	GA	GC	AG	21	161.9	53.9	66.25	20.56	113	64	5.2	33	0.19	0.85	1.63	3
965	1	0	1	AA	AA	AA	GG	AA	21	161.7	50	68.5	19.12	110	65	4.5	43	0.19	0.88	1.78	1.95
966	1	0	1	GA	GA	GA	GC	AG	20	159	50.6	71.55	20.01	114	73	4.2	29	0.2	1.03	2.05	2.63
967	1	0	1	GA	GA	GA	GC	AG	22	169.9	52.7	65.65	18.25	106	59	5	38	0.19	0.49	2.14	1.98
968	1	0	1	GA	GA	GA	GC	AG	24	160.8	60.5	71.2	23.39	107	72	5.3	99	0.4	2.07	1	0.94
969	1	1	2	GA	GA	GG	GC	AG	24	168	84.5	108.7	29.93	128	80	4.5	126	8	1.36	1.28	3.64
970	1	0	1	GA	GA	GA	GC	AG	20	167.6	89.8	95.15	31.96	114	71	4.3	78	0.4	1.17	1.05	3
971	0	.	1	GA	GA	GA	GC	AG	22	168.2	63.4	72.15	22.4	129	73	4.7	23	0.19	0.41	1.6	1.78
972	0	.	1	GA	GA	GA	GC	AG	22	172.8	81.3	86.3	27.22	137	78	4.7	16	0.8	0.55	1.21	2.12
973	0	.	0	GA	GA	GA	GC	AG	26	176.6	73.7	78.55	23.63	122	70	4.5	44	0.2	1.02	0.81	1.04
974	1	0	1	AA	AA	AA	GG	AA	20	165.1	62.7	74.65	23	97	58	4.5	17	0.19	0.48	1.86	1.96
975	1	1	0	GG	GA	GG	GC	GG	27	154.7	56.5	73.2	23.6	106	74	4.6	40	1.1	0.61	1.57	2.88
976	1	0	0	GA	GA	GA	GC	AG	29	165.6	67.9	69.1	24.75	107	55	6.1	36	0.19	0.79	1.96	2.53
977	1	1	0	GG	GG	GG	CC	GG	21	177	71.7	75.7	22.88	125	73	4.5	90	0.3	1.22	1.46	2.68
978	1	0	0	GA	GA	GA	GC	AG	25	172	66.1	72.4	22.34	100	61	5	19	0.19	0.72	1.33	2.3
979	1	0	1	AA	AA	AA	GG	AA	20	162.9	59.7	64.35	22.49	105	67	4.9	55	0.19	1.09	1.59	2.05
980	1	1	0	AA	AA	AA	GG	AA	26	167.1	62.5	73.05	22.38	108	67	5.1	18	0.9	1.11	2.22	2.44
981	1	0	1	AA	GA	GA	GC	AA	27	154	49.5	70	20.87	112	82	4.8	25	0.19	0.8	1.92	1.07
982	1	0	1	GA	GA	GA	GC	AG	20	168.2	65.8	76.3	23.25	118	71	4.7	52	0.19	0.64	1.45	1.63
983	1	0	1	GG	GG	GG	CC	GG	21	157.5	49	60.65	19.75	123	84	4.9	36	0.5	0.61	1.87	1.65
984	1	1	0	GG	GG	GG	CC	GG	20	164	60.2	70.65	22.38	125	75	4.8	55	0.4	1.39	1.95	2.23
985	1	0	1	AA	AA	AA	GG	AA	23	162.7	75	83.667	28.33	133	85	4.8	97	0.19	1.29	2.09	2.54
986	1	1	0	GA	GA	GA	GC	AG	21	169.8	68.2	76.7	23.65	119	79	4.7	23	0.2	0.79	1.19	1.45
987	1	0	0	GA	GA	GA	GC	AG	24	169.5	63.2	71.8	21.99	99	67	4.9	44	0.19	1.23	1.26	1.79
988	1	0	1	GA	GA	GA	GC	AG	21	170	56.3	64.75	19.48	104	55	4.8	26	0.19	0.95	2.63	2.06
989	1	0	1	GA	GA	GA	GC	AG	29	159.8	52.5	67.15	20.55	106	70	4.8	63	0.19	1.09	2.35	1.87
990	1	1	0	GA	GA	GG	CC	AG	20	173.2	66.7	76.9	22.23	113	70	4.7	72	2.8	0.97	2.33	1.99
991	1	0	1	GG	GG	GG	CC	GG	23	159	54.5	67.75	21.55	104	69	4.7	46	4.9	1.16	1.22	2.08
992	1	0	1	GA	GA	GA	GC	AG	20	167.6	57.5	75.4	20.47	107	77	4.7	96	0.19	1.04	1.93	2.64
993	1	0	1	GG	GG	GG	CC	GG	25	170	54.5	65.1	18.85	106	68	4.2	13	.	0.95	1.49	2.25
994	1	1	0	GA	GA	GA	GC	AG	28	165.9	56.5	66.667	20.52	114	76	4.3	20	5.1	0.81	1.58	2.48
995	1	0	3	AA	AA	GA	GG	AA	20	162.1	58.5	64.1	22.26	106	61	4.4	54	0.19	0.67	1.7	2.03
996	1	1	0	GG	GG	GG	CC	GG	28	165.4	62.9	65	22.99	105	65	4.8	13	3	0.86	1.23	2.35
997	1	1	3	AA	AA	AA	GG	AA	20	168	58.7	70.8	20.79	107	60	4.3	38	0.19	1.32	2.02	2.36
998	1	0	0	GA	GA	GA	GC	AG	26	162.4	57.8	68.267	21.91	97	69	4.9	38	0.5	0.8	1.76	2.87
999	1	0	2	GA	GA	GA	GC	AG	21	159.5	61.4	76.75	24.13	116	72	4.9	60	0.19	0.94	1.63	2.52
1000	1	0	2		GA	GA	GC	AG	20	162.5	54.4	64.9	20.6	99	59	4.5	22	0.19	0.53	1.71	1.82
1001	0	.	0	GA	GA	GA	GC	AG	22	174.7	63	75.45	20.64	120	74	4.7	28	0.19	0.66	1.31	3.71
1002	0	.	1	GA	AA	GA	GG	AG	23	173.4	78.4	87.65	26.07	119	64	5	97	1.1	0.97	1.36	2.63
1003	1	1	0	GA	GA	GA	GC	AG	20	168.2	68.5	74.1	24.21	114	62	4.5	125	2.8	2.14	1.73	2.79
1004	1	0	1	GA	GA	GA	GC	AG	21	164.3	67	75.6	24.81	122	74	4.8	49	0.2	0.36	1.53	1.3
1005	1	0	0	GG	GG	GG	CC	GG	22	171.1	79.7	79.3	27.22	120	73	4.6	99	0.2	0.78	1.27	2.59
1006	1	0	1	GA	GA	GA	GC	AG	21	172	56.2	66.4	18.99	100	65	4.5	43	0.19	0.48	1.41	1.79
1007	1	0	0	AA	AA	AA	GG	AA	21	157.8	53	72.2	21.28	98	66	4.8	13	3.4	0.87	1.35	3.84
1008	1	0	3	GA	AA	GA	GG	AG	23	158.6	55.7	68.95	22.14	106	62	4.3	62	0.19	0.26	1.37	1.48
1009	1	0	0	AA	AA	AA	GG	AA	20	164.6	52.2	63.65	19.26	111	66	4.9	30	0.19	0.5	1.84	0.7
1010	1	0	2	GA	GA	GA	GC	AG	24	172.7	72.3	71.1	24.24	111	68	4.3	20	0.2	0.53	1.95	2.21
1011	0	.	0	GG	GG	GG	CC	GG	24	190.5	90.8	86.6	25.02	146	72	4.8	13	0.19	0.59	1.13	2.67
1012	0	.	1	AA	GA	AA	GC	AA	20	180.8	88.6	87.9	27.1	118	70	5.3	70	0.3	0.64	1.11	2.36
1013	0	.	1	AA	AA	AA	GG	AA	22	165	58.7	73.3	21.56	115	65	5.3	64	0.19	0.8	1.33	1.81
1014	0	.	2	AA	AA	AA	GG	AA	21	177.6	90.1	101.5	28.56	124	70	4.6	103	2.1	1.11	0.92	2.59
1015	0	.	0	GA	GA	GA	GC	AG	28	171.6	68	77.9	23.09	122	72	4.9	15	0.19	0.92	1.13	2.2
1016	0	.	0	GA	GA	GA	GC	AG	27	168.4	69.4	79.2	24.47	116	53	5.2	46	0.4	0.56	0.98	2.4
1017	0	.	0	GG	GG	GG	CC	GG	23	180.5	96.4	101.65	29.58	136	91	5	29	0.4	2.3	1.11	2.24
1018	1	0	2	GG	GG	GG	CC	GG	21	161	57.1	71.8	22.02	99	63	4.9	56	0.19	0.64	1.97	2.92
1019	1	1	1	AA	AA	AA	GG	AA	22	161.1	57.3	71.85	22.07	108	65	3.9	28	3.6	0.55	1.69	1.91
1020	1	0	1	AA	AA	AA	GG	AA	22	155.7	61.7	73.65	25.45	115	78	4.2	13	0.2	0.97	2.13	2.34
1021	1	1	0	AA	AA	AA	GG	AA	22	173.3	63.8	71.4	21.24	108	69	4.6	13	0.3	0.81	2.07	1.78
1022	1	0	1	GG	GG	GG	CC	GG	20	161	48.4	63.3	18.67	116	86	4.5	13	0.19	0.96	1.39	2.82
1023	1	1	3	AA	AA	AA	GG	AA	21	161.2	54.9	67.1	21.12	113	61	4.4	25	2.2	1.24	2.4	3.83
1024	1	0	0	AA	AA	AA	GG	AA	22	157.5	48.2	64.25	19.43	107	65	4.6	13	0.19	0.84	1.45	2.37
1025	1	0	1	AA	AA	AA	GG	AA	20	163	48.4	64.2	18.21	109	81	5.2	49	0.19	0.6	1.77	2.4
1026	1	0	1	AA	AA	AA	GG	AA	21	148.3	46.5	64.367	21.14	112	66	5.1	23	0.19	0.56	1.66	2.97
1027	1	0	0	GA	GA	GA	GC	AG	20	171.55	68.7	80.55	23.34	120	60	4.9	36	0.19	0.69	1.82	1.62
1028	1	0	0	GA	GA	GA	GC	AG	28	168.5	107.9	103.45	38	99	75	4.8	88	4.2	0.56	1.05	3.24
1029	1	0	1	GA	GA	GA	GC	AG	20	159.9	49.3	61.3	19.28	107	65	4.3	27	0.19	0.82	1.17	2.03
1030	1	0	0	GG	GG	GG	CC	GG	23	172.6	66.4	77.8	22.28	120	74	5.1	13	0.19	0.48	1.61	2.1
1031	1	1	1	AA	GA	AA	GC	AA	21	157.3	52.2	65.6	21.09	102	66	4.5	23	1.7	1.36	2.05	1.9
1032	1	0	3	GA	GA	GA	GC	AG	24	167.7	60.5	70.35	21.51	103	69	4.4	51	1.6	0.59	1.28	1.64
1033	1	0	0	AA	AA	AA	GG	AA	20	174	60.6	67.967	20.01	93	54	4.6	26	0.6	0.53	1.63	1.65
1034	0	.	2	AA	AA	AA	GG	AA	20	186.1	159.21	149.6	45.97	117	71	5.3	507	8.4	0.84	0.98	2.99
1035	0	.	2	AA	AA	AA	GG	AA	21	178.1	67.9	73.8	21.4	118	72	4.7	68	0.19	1.24	1.04	2.85
1036	0	.	0	GA	GA	GA	GC	AG	26	172.25	64.3	75.567	21.67	106	69	4.4	13	0.6	0.92	0.85	2.57
1037	0	.	0	GG	GG	GG	CC	GG	24	182.3	102.1	95.25	30.72	120	74	4.4	13	10.8	0.51	1.76	2.91
1038	0	.	2	GG	GG	GG	CC	GG	21	161.2	50.1	69.85	19.28	120	77	4.8	13	3.3	0.6	1	2.2
1039	1	1	0	AA	AA	AA	GG	AA	25	167.9	61.1	65.15	21.67	110	72	4.6	40	13.5	1.01	1.81	1.89
1040	1	0	2	GA	GA	GA	GC	AG	20	155.9	57.3	68.5	23.57	92	64	4.6	23	0.19	0.89	1.59	2.19
1041	1	0	0	GA	GA	GA	GC	AG	28	162.9	61.8	78.85	23.28	107	72	4.5	45	0.2	0.82	1.23	3.53
1042	1	0	3	GG	GG	GG	CC	GG	24	160.3	59.5	69.1	23.15	123	80	4.8	56	14.3	0.54	1.72	2.49
1043	0	.	2	GA	GA	GA	GC	AG	20	174.5	78.3	91.1	25.71	118	72	5	49	1.1	1.77	0.92	3.07
1044	0	.	0	GA	GA	GA	GC	AG	23	178.3	70.1	71.75	22.05	123	74	5	19	0.19	0.62	1.8	1.96
1045	0	.	0	GA	AA	AA	GG	AG	27	177.3	78.6	85.9	25	118	69	4.9	24	0.3	1.16	0.76	3.02
1046	0	.	0	GG	GA	GG	GC	GG	20	167.5	88.4	100.35	31.5	136	77	4.8	95	6.7	1.54	0.86	2.51
1047	1	1	0	GA	AA	GA	GG	AG	21	165.7	51.9	64.65	18.9	115	76	4.7	13	4.67	0.6	2.3	1.99
1048	1	1	1	GA	GA	GA	GC	AG	21	166.6	63.8	70.05	22.98	111	64	5	45	3.5	0.92	2.03	2.82
1049	1	0	1	GA	GA	GA	GC	AG	20	170.9	65.6	72.65	22.46	112	77	4.6	64	0.19	0.87	1.37	2.35
1050	1	0	0	GA	GA	GA	GC	AG	26	160.4	55.9	71.867	21.72	99	67	4.6	97	0.19	0.89	2.39	2.18
1051	1	0	0	AA	AA	AA	GG	AA	20	165.8	81	89.85	29.46	119	72	4.7	96	1	1.22	1.44	3.25
1052	1	0	0	GA	GA	GA	GC	AG	26	163.9	61	71.8	22.7	94	56	4.6	25	0.19	0.95	1.63	2.23
1053	1	0	1	AA	AA	AA	GG	AA	21	166.2	54.3	61.25	19.65	103	67	4.5	77	0.19	1.04	1.73	2.01
1054	1	0	1	AA	AA	AA	GG	AA	20	160.9	51	67.25	19.69	104	62	4.8	49	0.19	0.88	1.28	1.84
1055	1	0	1	GA	GA	GA	GC	AG	21	167.5	61.7	72.55	21.99	97	56	4.6	24	0.19	0.97	1.28	1.58
1056	1	0	1	GA	GA	GA	GC	AG	22	154.9	50.2	71.65	20.92	93	49	4.7	26	0.19	0.51	1.88	2.08
1057	1	0	1	GA	GA	GA	GC	AG	22	159.1	56.6	71.2	22.36	103	61	4.6	13	0.3	0.46	1.51	2.14
1058	0	.	2	GA	GA	GG	GC	AG	21	183.8	106.1	101.95	31.4	138	76	5.4	29	4.2	0.76	1.16	2.38
1059	0	.	1	GG	GG	GG	CC	GG	22	180.7	88	90.25	26.95	127	79	5.1	47	0.3	2.64	1.23	3.03
1060	0	.	0	GA	GA	GA	GC	AG	21	173.1	59	73.167	19.69	108	61	5.1	13	0.19	1.13	1.55	2.21
1061	1	0	1	GA	GA	GA	GC	AG	21	158.5	55.3	63.65	22.01	114	73	5	38	0.19	1.13	1.26	2.41
1062	1	0	1	GA	GA	GA	GC	AG	25	157.2	54.5	68.3	22.05	112	62	4.9	61	0.19	1.34	1.39	4.03
1063	1	1	0	GG	GG	GG	CC	GG	26	167.7	73	78.25	25.95	115	66	4.7	23	16	1.18	1.72	1.55
1064	1	0	2	GG	GG	GG	CC	GG	21	160.9	55.4	66.9	21.39	98	69	5	36	0.5	0.47	1.35	1.64
1065	1	0	1	GA	GA	GA	GC	AG	21	164.3	63.3	73.6	23.44	110	67	4.8	55	0.19	0.6	1.73	1.62
1066	1	0	1	GA	GA	GA	GC	AG	21	166.9	53.7	69.8	19.27	101	76	5.1	34	0.19	1.85	1.74	2.37
1067	1	0	0	GA	GA	GA	GC	AG	21	186.2	82.7	77.75	23.85	120	77	5.4	66	0.19	0.61	1.72	2.1
1068	0	.	0	GA	GA	GA	GC	AG	23	187.9	70	73.2	19.82	127	81	4.8	39	0.19	1.1	0.9	2.09
1069	0	.	1	AA	AA	AA	GG	AA	22	177.8	85.8	82.45	27.14	151	87	5	42	32.3	1.01	0.96	2.66
1070	0	.	0	AA	AA	AA	GG	AA	26	160.7	56.4	73.6	21.83	128	76	5.7	33	1.9	2.79	0.86	1.81
1071	0	.	1	GA	GA	GA	GC	AG	21	179.6	66.8	70.5	20.7	125	69	5.1	27	0.7	0.76	1.55	2.49
1072	0	.	1	GG	GG	GG	CC	GG	21	169.5	70.2	79.75	24.43	125	73	4.8	13	0.19	1.18	1.01	2.22
1073	1	0	1	AA	AA	AA	GG	AA	20	154.4	46.5	64.133	19.5	105	72	4.4	13	0.19	0.52	1.57	2.5
1074	1	0	1	GA	GA	GA	GC	AG	20	160.5	52.1	66.65	20.22	96	72	5.1	55	0.19	0.91	1.79	2.65
1075	1	1	1	GG	GG	GG	CC	GG	20	161.1	56.5	74.4	21.76	94	65	4.9	52	0.19	0.45	1.33	1.77
1076	1	0	1	GG	GG	GG	CC	GG	21	151.5	49.2	64.15	21.43	101	68	5.3	52	0.19	0.7	1.06	2.24
1077	0	.	1	AA	AA	AA	GG	AA	23	171.6	67.3	73.8	22.85	111	62	5	27	0.19	1.45	1.19	2.71
1078	0	.	1	GA	GA	GA	GC	AG	20	173.75	80.6	86.45	26.69	129	76	5.4	68	0.19	0.86	0.89	3.62
1079	1	1	0	GA	GA	GA	GC	AG	28	162.7	66.6	81.6	25.15	106	73	4.3	53	6.1	1.34	1.91	1.64
1080	1	0	0	AA	AA	AA	GG	AA	20	166.1	47.1	56.95	17.07	112	76	5.2	13	0.19	1.39	2.32	2.63
1081	1	0	2	GG	GG	GG	CC	GG	21	155	53.5	64.85	22.26	103	62	4.5	55	0.4	0.53	1.07	2.64
1082	1	1	1	GA	GG	GA	CC	AG	23	167	57.9	68.9	20.76	110	71	4.6	30	0.19	0.88	1.96	3.27
1083	1	0	0	AA	AA	AA	GG	AA	22	174.2	67.3	75.95	22.17	108	63	5.1	18	0.9	0.45	1.17	2.66
1084	1	1	1	GA	GA	GA	GC	AG	21	160.8	70.9	78.25	27.42	106	78	4.8	130	2.5	0.92	1.67	5.44
1085	0	.	1	GA	GA	GA	GC	AG	22	183.9	78.9	77.9	23.32	125	74	4.9	31	0.19	0.71	1.71	1.8
1086	0	.	1	AA	AA	AA	GG	AA	28	177.8	89.3	92.8	28.24	121	71	5.3	24	4.8	0.94	1.07	1.91
1087	0	.	0	GA	AA	GA	GG	AG	22	176.4	76.4	80.45	24.55	121	63	4.7	19	0.4	0.91	1.47	1.81
1088	1	0	0	GA	GA	GA	GC	AG	21	154.7	64.4	80.95	26.9	117	66	4.7	21	0.8	1.71	1.48	2.32
1089	1	0	0	AA	AA	AA	GG	AA	20	172.4	78.2	77	26.31	114	56	5	26	0.19	0.56	1.35	2.14
1090	1	1	1	AA	AA	AA	GG	AA	20	157.1	47.4	64.4	19.2	120	78	4.4	28	0.19	0.39	1.49	1.92
1091	1	0	2	GA	GA	GA	GC	AG	21	159.2	74.6	93.55	29.43	103	68	4.5	88	1.5	1.54	1	2.9
1092	1	1	2	GA	GA	GA	GC	AG	21	165.3	59.8	71.167	21.88	103	66	5.1	27	1.9	0.88	1.48	2.51
1093	1	0	1	GA	GA	GA	GC	AG	20	163.2	60.1	76.8	22.56	95	64	4.9	41	0.19	0.53	1.24	2.97
1094	1	0	0	AA	AA	AA	GG	AA	28	164.2	56.1	67.85	20.8	107	69	5	18	0.19	0.58	1.51	2.99
1095	1	0	1	AA	GA	AA	GC	AA	26	153.4	52.1	71.15	22.14	125	82	4.8	13	1.3	1.19	1.2	1.38
1096	1	0	0	GG	GG	GG	CC	GG	29	164.1	64.3	76.833	23.87	117	79	5.7	85	0.19	0.67	1.86	2.69
1097	1	0	0	AA	AA	GA	GG	AA	20	163.2	59.3	69.7	22.26	115	75	4.4	13	0.19	0.75	1.17	2.5
1098	1	1	0	GA	GA	GA	GC	AG	23	172	69	75.35	23.32	110	63	4.7	13	1.5	1.27	2.41	1.6
1099	0	.	0	GG	GG	GG	CC	GG	24	170.7	69.8	80.3	23.95	124	70	5	13	13.7	0.7	1.4	2.07
1100	0	.	1	GG	GG	GG	CC	GG	21	169.8	70.3	84.1	24.38	108	65	5	48	0.5	0.76	1.3	2.17
1101	0	.	0	AA	AA	AA	GG	AA	26	176.5	68.1	77	21.86	118	67	5.3	20	0.19	0.43	1.6	2.64
1102	1	0	0	GA	GA	GG	GC	AG	24	164.3	55.1	67.3	20.41	111	65	4.7	17	0.19	1.06	1.29	2.85
1103	1	1	0	GG	GG	GG	CC	GG	21	166.8	53.6	65.05	19.26	117	70	4.7	13	0.19	0.54	1.44	2.01
1104	1	1	3	AA	AA	GA	GC	AA	21	167.4	62.6	73	22.33	108	57	4.7	26	0.2	1.15	1.17	1.99
1105	1	1	0	AA	AA	AA	GG	AA	25	164.1	52.9	72.3	19.64	124	91	4.8	61	2.5	1.49	1.58	2.27
1106	0	.	3	GA	AA	GA	GG	AA	21	177.2	77.9	79.85	24.8	128	78	4.4	18	4.8	0.65	1.29	2.72
1107	1	0	1	AA	AA	AA	GG	AA	25	155.2	49.5	63.15	20.55	114	64	4.9	13	0.19	0.69	1.91	2.65
1108	0	.	3	GA	GA	GA	GC	AG	20	171.5	69.7	76.9	23.69	118	73	5.5	45	0.2	0.36	1.57	2.53
1109	0	.	1	GA	GA	GA	GC	AG	21	179.1	75.7	77.3	23.59	116	72	5	57	0.2	1.32	0.99	1.67
1110	1	0	2	AA	AA	AA	GG	AA	21	156	50.2	67.2	20.62	87	57	4.8	54	1.1	0.63	1.33	2.4
1111	1	0	1	GG	GG	GG	CC	GG	20	152.4	45.4	65.7	19.54	100	72	5.3	29	0.19	0.9	1.66	1.72
1112	1	0	1	GA	GA	GA	GC	AG	20	165.6	58	66.8	21.14	109	74	5.8	47	0.3	0.67	1.45	3.01
1113	1	0	2	GA	GA	GA	GC	AG	23	161.8	61.5	71.15	23.49	101	62	4.7	28	0.4	0.44	1.64	2.57
1114	1	0	0	GG	GG	GG	CC	GG	22	169	58.1	68.6	20.34	108	68	4.5	32	0.19	0.5	1.17	2.08
1115	1	1	0	AA	AA	AA	GG	AA	24	158.1	54.5	61.5	21.8	110	76	4.8	38	8.8	1.07	1.83	2.63
1116	1	0	1	AA	AA	AA	GG	AA	22	155.9	58.5	76.65	24.06	103	69	5.2	59	1.5	0.67	1.11	2
1117	1	0	1	GA	GA	GA	GC	AG	20	162.3	51.5	65.25	19.55	101	66	4.8	56	0.19	0.44	1.84	2.4
1118	1	0	0	GA	GA	GA	GC	AG	25	162.9	58.6	72.4	22.08	111	67	5.2	44	0.19	0.9	2.07	4.51
1119	1	0	1	GA	GA	GA	GC	AG	20	155.7	47.7	69.8	19.67	103	71	5.1	26	0.19	0.79	1.23	3.06
1120	1	0	1	AA	AA	AA	GG	AA	20	166.4	48.5	63.8	17.51	106	77	4.7	13	0.19	0.77	1.37	2.72
1121	0	.	2	GG	GG	GG	CC	GG	26	172.2	76.4	82.767	25.76	131	88	5.6	27	0.19	0.54	1.17	2.19
1122	0	.	0	GG	GG	GG	CC	GG	24	174.2	78.3	86.567	25.8	123	77	5.3	57	2.5	2.58	0.96	3.33
1123	1	0	0	GG	GA	GG	CC	GG	23	162.5	49.6	61.2	18.78	99	61	4.8	33	0.19	0.71	1.89	1.58
1124	1	1	0	GA	GA	GA	GC	AG	22	168.6	71	81.7	24.97	116	71	4.6	71	5.1	2.24	1.89	2.34
1125	1	0	0	AA	AA	AA	GG	AA	28	160	64.3	72.85	25.11	107	61	4.8	13	0.7	0.72	1.56	2.35
1126	1	0	1	AA	AA	AA	GG	AA	21	166.5	64	77.55	23.08	125	77	4.8	36	0.2	0.61	1.32	1.13
1127	1	0	0	AA	AA	AA	GG	AA	20	166.8	63.5	72.65	22.82	100	61	4.5	13	0.19	0.7	1.34	2.3
1128	1	0	0	GA	GA	GA	GC	AG	20	173.5	71.9	77.3	23.88	110	68	4.9	50	0.4	0.86	1.35	2.79
1129	1	0	1	GG	GG	GG	CC	GG	25	162.7	55.1	72.95	20.81	103	70	4.6	40	0.19	1.14	1.43	2.64
1130	1	1	0	GG	GG	GG	CC	GG	26	161	56.8	64.25	21.91	115	77	4.8	47	0.19	0.93	1.78	2.55
1131	0	.	0	AA	AA	AA	GG	AA	20	186	69.9	78.267	20.2	111	61	4.8	13	0.19	0.94	1.3	2.39
1132	0	.	0	GG	GG	GG	CC	GG	25	174.4	75.4	78.95	24.79	125	76	5.2	48	0.2	0.94	0.94	2.24
1133	0	.	1	GG	GG	GG	CC	GG	21	171.5	70.9	78.75	24.1	137	72	5.2	27	0.19	1.04	1.44	3.06
1134	1	1	0	GA	GA	GA	GC	AG	25	161.5	57.8	70.25	22.16	95	64	4.8	13	0.7	0.89	1.77	3.33
1135	1	0	1	GA	GA	GA	GC	AG	20	170.6	51.2	60	17.59	102	68	5	49	0.19	1.17	1.39	2.78
1136	1	1	1	AA	AA	AA	GG	AA	22	166.6	59.3	68.7	21.36	114	73	4.8	41	0.3	1.51	1.54	1.99
1137	1	0	0	GG	GA	GG	GC	GG	23	167.9	63.7	68.45	22.59	105	61	4.9	13	0.19	0.59	1.93	2.2
1138	0	.	1	GG	GG	GG	CC	GG	24	166	85.3	95.3	30.95	132	71	7	81	4	0.84	1.18	2.95
1139	0	.	1	AA	GA	AA	GC	AA	20	172.8	75.8	84	25.38	122	71	4.9	58	0.2	1.15	1.25	2.57
1140	0	.	0	GA	GA	GA	GC	AG	23	182.2	68.7	75.25	20.69	120	68	4.9	13	0.19	0.54	1.05	1.11
1141	0	.	0	GA	GA	GA	GC	AG	20	171.8	59.3	72.25	20.09	114	59	4.5	21	0.3	0.89	1.16	2.91
1142	1	0	0	GA	GA	GA	GC	AG	20	156.6	49.5	66.25	20.18	117	65	4.7	46	0.19	0.58	1.93	3.09
1143	1	1	0	AA	AA	AA	GG	AA	22	169	55	68.8	19.25	100	61	5.6	33	0.19	1	1.27	2.07
1144	1	0	0	GG	GG	GG	CC	GG	21	169.4	63.6	75.1	22.16	110	72	5.2	136	0.19	1.29	1.24	2.45
1145	0	.	2	GG	GG	GG	CC	GG	20	166.6	55.9	68.8	20.14	117	80	5.2	37	0.19	0.82	1.39	1.87
1146	0	.	0	GG	GG	GG	CC	GG	21	170.9	72.5	81.25	24.82	118	69	4.8	13	0.7	1.3	0.99	2.25
1147	0	.	0	AA	AA	AA	GG	AA	27	181.3	87.7	93.55	26.68	118	74	5.4	38	3.1	1.69	0.92	2.23
1148	0	.	0	GA	AA	GA	GG	AG	27	182.6	76.5	77.367	22.94	139	75	4.6	13	0.19	0.36	1.47	3.36
1149	0	.	1	GA	GA	GA	GC	AG	21	174.4	81.9	81.4	26.92	121	65	4.5	54	0.19	0.4	1.21	2.05
1150	0	.	0	GA	GA	GA	GC	AG	21	173.5	71.2	86.05	23.65	131	72	5	40	0.2	0.83	1.31	3.13
1151	0	.	1	AA	AA	AA	GG	AA	26	176.2	72.1	75.8	23.22	109	66	4.8	19	0.19	0.71	1.69	3.52
1152	0	.	2	GA	GA	GA	GC	AG	24	176.5	89.2	94.8	28.63	127	82	5.5	72	2.5	0.83	0.96	3.64
1153	1	0	1	GG	GG	GG	CC	GG	20	162.6	53.8	65.45	20.34	111	70	4.9	35	0.3	0.58	1.54	2.26
1154	1	1	0	GA	GA	GA	GC	AG	22	160	51.8	63.333	20.23	90	68	5	35	0.5	1.31	1.43	2.26
1155	1	0	1	GA	GA	GA	GC	AG	23	162.8	65.4	79.333	24.67	105	69	5.5	70	0.2	1.05	1.18	2.42
1156	1	0	0	GG	GG	GG	CC	GG	22	160.2	77.6	93.15	30.23	119	75	4.8	66	9.2	0.34	1.42	2.72
1157	1	0	1	GA	GA	GA	GC	AG	20	150.5	51.3	66.75	22.64	111	73	5.1	15	0.8	0.62	1.65	2.5
1158	1	1	0	AA	AA	AA	GG	AA	25	160.6	50.2	72.75	19.46	119	79	4.9	20	0.9	1.38	1.42	3.05
1159	1	0	1	GA	GA	GA	GC	AG	20	169	85.5	89.25	29.93	133	82	5.3	63	0.2	2.3	1.22	2.21
1160	1	0	1	GG	GG	GG	CC	GG	20	162	62.3	69.25	23.73	110	73	4.8	41	0.19	0.81	1.34	2.34
1161	1	0	0	GA	GA	GA	GC	AG	22	163.4	80.7	88.2	30.22	108	80	4.6	88	0.7	1.88	1.49	2.02
1162	1	0	0	GA	GA	GA	GC	AG	29	164.4	55.9	67.15	20.68	107	64	4.6	35	0.2	0.82	1.78	2.93
1163	1	0	1	GA	GG	GA	CC	AG	22	156.4	51.9	69.1	21.21	107	74	3.8	13	0.19	0.83	1.7	3.21
1164	1	0	1	GA	GA	GA	GC	AG	20	158.8	47.9	62.9	18.99	111	77	4.8	13	0.19	0.73	1.51	2.67
1165	1	0	2	GA	GA	GA	GC	AG	25	165	60	69.9	22.03	112	70	4.7	60	0.19	1.09	1.1	1.6
1166	1	1	0	AA	AA	AA	GG	AA	22	.	.	.	.	.	.	.	.	.	.	.	.
1167	1	0	1	AA	AA	AA	GG	AA	20	172.5	58.9	65.55	19.79	114	77	4.9	20	0.19	0.79	1.65	2.12
1168	1	0	1	AA	AA	AA	GG	AA	20	160.4	52.4	66.95	20.36	105	72	4.7	42	0.19	0.71	1.58	2.87
1169	1	0	1	GA	GA	GA	GC	AG	20	152.6	48.8	65.05	20.95	105	65	5.8	143	0.19	0.96	1.33	2.26
1170	1	0	1	GG	GG	GG	CC	GG	20	154	56.6	74.1	23.86	107	65	5.4	245	0.19	0.94	1.19	2.31
1171	1	0	1	GG	GG	GG	CC	GG	20	163.6	60.6	71.3	22.64	106	61	4.8	64	0.19	1.03	1.42	2.43
1172	1	0	1	GA	GA	GA	GC	AG	27	162.5	61.8	75.3	23.4	118	70	5.3	93	0.5	0.63	1.58	1.77
1173	1	0	0	GA	GA	GA	GC	AG	28	167.6	56.6	67.75	20.14	117	67	4.6	37	0.19	0.48	1.75	2.37
1174	1	0	0	AA	GA	AA	GC	AA	24	169.8	61.5	70.4	21.33	114	75	5	38	0.19	0.68	1.66	2.28
1175	1	0	1	AA	AA	AA	GG	AA	21	161.9	50.5	62.1	19.26	90	58	4.1	13	0.19	0.76	2.1	2.7
1176	1	0	0	AA	GA	GA	GC	AA	26	155	63	72.8	26.22	112	74	4.8	95	0.5	0.44	1.43	2.03
1177	1	0	1	AA	AA	AA	GG	AA	20	157.4	43.1	60.3	17.39	103	64	4.2	27	0.19	1.35	1.21	3.01
1178	1	0	1	AA	AA	AA	GG	AA	21	169.3	64.5	73.65	22.5	98	68	5.3	39	0.19	0.67	1.57	1.82
1179	1	0	1	GG	GG	GG	CC	GG	20	149.2	49.2	72.05	22.1	109	68	5.6	48	0.19	0.57	2.23	3.48
1180	1	0	1	AA	GA	AA	GC	AA	20	153.7	55.5	77.167	23.49	113	63	5	28	0.19	0.91	1.44	2.26
1181	1	0	1	AA	GA	AA	GC	AA	20	162.4	73.5	85.4	27.86	109	74	4.6	42	1.4	0.75	1.4	3.09
1182	1	0	1	GA	GA	GA	GC	GG	20	162.7	64.8	73	24.47	117	77	5.1	24	0.19	0.39	0.75	1.45
1183	1	0	1	GA	GA	GA	GC	AG	29	163.8	53	64.1	19.75	97	65	4.6	33	0.3	0.33	1.4	1.8
1184	1	0	2	GG	GG	GG	CC	GG	21	161.6	69.2	81.75	26.49	133	74	5.2	144	0.6	1.86	0.95	3.28
1185	0	.	1	AA	AA	AA	GG	AA	21	173	68	78.65	22.72	125	80	5.2	36	0.19	0.75	1.08	1.56
1186	0	.	1	GA	GA	GA	GC	AG	20	173.2	80.4	84.4	26.8	128	63	4.9	35	0.19	0.76	1.57	2.54
1187	0	.	0	GG	GG	GG	CC	GG	21	177.2	67.4	76.15	21.46	107	64	5.2	35	0.19	0.67	1.16	1.92
1188	0	.	2	GA	GA	GA	GC	AG	20	175.2	77.8	82.9	25.34	114	66	4.6	26	0.2	1.04	1.34	2.63
1189	1	0	1	GA	GA	GA	GC	AG	20	159.6	60.5	72.25	23.75	116	86	5.1	54	0.19	1.19	1.85	2.68
1190	1	1	0	GG	GG	GG	CC	GG	22	167.1	63.8	65.75	22.84	117	67	4.9	82	0.19	0.82	1.61	2.1
1191	1	0	1	GG	GG	GG	CC	GG	20	163.1	59.7	67.6	22.44	111	65	4.9	58	0.19	0.68	1.69	2.25
1192	1	0	0	GG	GG	GG	CC	GG	22	164.3	69.5	78.2	25.74	103	60	4.9	21	0.19	0.81	1.34	2.49
1193	1	0	2	AA	AA	AA	GG	AA	21	159.3	57.9	69.7	22.81	109	75	5	28	0.2	0.56	1.71	2.01
1194	1	0	1	GA	AA	GA	GG	AG	21	165.6	56.4	69.45	20.56	110	69	4.7	18	0.19	0.64	1.73	3.13
1195	1	0	0	GG	GG	GG	CC	GG	22	154.8	54.6	69.25	22.78	108	61	4.9	36	1	0.46	1.38	2.24
1196	1	0	3	GA	GA	GA	GC	AG	27	173.3	93.6	94.25	31.16	114	83	5.1	109	2.5	0.54	1.78	1.73
1197	0	.	0	GA	GA	GA	GC	AG	21	178.3	75.2	78.25	23.65	138	84	4.7	13	0.2	0.65	1.25	2.13
1198	0	.	0	GA	GA	GG	GC	AG	26	173.5	67.3	80.35	22.35	136	70	4.8	13	0.19	0.54	1.56	2.23
1199	0	.	1	GG	GG	GG	CC	GG	22	179.4	71.6	74.85	22.24	116	63	5.6	32	0.19	0.63	1.41	1.42
1200	0	.	0	GA	GA	GA	GC	AG	28	179.9	81.7	80.95	25.24	122	70	4.8	13	11.5	0.58	2.19	2.9
1201	0	.	2	GG	GG	GG	CC	GG	20	154.4	63.7	79.5	26.72	111	67	5	58	1	0.49	1.03	1.48
1202	1	0	1	GG	GG	GG	CC	GG	27	164.1	62	68.35	23.02	99	66	4.8	13	0.19	0.46	1.49	2.69
1203	1	0	1	GA	GA	GA	GC	AG	22	155.4	54.9	71	22.73	113	72	5.2	33	0.3	0.46	1.5	2.62
1204	1	0	2	GG	GG	GG	CC	GG	22	169.5	64.2	71.75	22.34	98	53	4.2	111	0.19	0.51	1.48	1.84
1205	1	0	0	GA	GA	GA	GC	AG	21	170	76	92.8	26.29	116	80	4.8	37	0.19	0.78	1.65	2.57
1206	1	1	0	GA	GA	GA	GC	AG	25	166.5	68.2	74.85	24.6	120	67	5.2	59	2.7	0.94	1.85	2.18
1207	1	1	0	AA	AA	AA	GG	AA	26	173.8	60.8	64.2	20.12	114	75	4.9	31	0.2	1.01	2	1.62
1208	1	0	0	GA	GA	GA	GC	AG	26	170.6	69	72.6	23.7	105	61	5.4	108	0.3	0.98	1.43	3.47
1209	1	1	1	AA	AA	AA	GG	AA	22	162	71	82.3	27.05	104	64	4.8	77	7.6	1.4	1.96	2.2
1210	1	0	1	GA	GA	GA	GC	AG	23	155	54.9	68.6	22.85	119	85	4.5	13	0.19	0.39	1.6	3.38
1211	1	1	0	GA	GA	GA	GC	AG	20	177	80.5	81.25	25.69	113	69	5	73	1.3	1.1	1.64	2.71
1212	1	0	0	AA	AA	AA	GG	AA	20	163	59.8	67.05	22.5	110	67	4.8	61	0.4	0.51	1.59	1.7
1213	1	1	3	AA	AA	AA	GG	AA	20	169.4	60.5	67.35	21.08	125	67	5.1	18	0.19	2.04	2.15	2.56
1214	1	0	0	GA	GA	GG	GC	AG	22	156.4	49	63.5	20.03	96	70	5	36	0.19	0.93	1.36	1.65
1215	1	0	1	GA	GA	GA	GC	AG	20	162.4	56	69.45	21.23	105	71	4.7	44	0.7	1.9	1.32	2.27
1216	1	1	0	GA	GA	GA	GC	AG	22	172.7	71.8	75.45	24.07	122	72	5.3	31	3	0.92	1.8	2.37
1217	1	0	1	GA	GA	GA	GC	AG	23	157.5	51.9	70.75	20.92	113	62	5	60	0.19	1.11	1.69	2.33
1218	1	0	1	AA	AA	AA	GG	AA	24	168.9	62	69.15	21.73	107	67	4.9	25	0.2	0.45	1.26	2.53
1219	1	0	3	AA	AA	GA	GG	AA	23	156	85.7	85.35	35.21	117	81	5.4	72	14.1	0.69	1.23	2.19
1220	1	1	0						21	159.9	48	65.433	18.77	114	74	4.7	23	0.7	1.01	1.62	2.3
1221	1	0	2	GA	GA	GA	GC	AG	25	158.1	45.7	62.7	18.28	106	71	5.2	39	0.19	0.77	1.68	3.37
1222	1	0	1	GA	GA	GA	GC	AG	25	156.8	49.5	66.5	20.13	108	69	4.4	25	0.19	0.78	1.61	2.01
1223	1	0	2	AA	AA	GA	GG	AA	21	152.9	45.1	61.95	19.29	105	73	4.6	45	0.19	0.82	1.63	2.91
1224	1	0	3	GA	GA	GA	GC	AG	21	166	57	63.7	20.68	111	64	4.7	42	0.2	0.55	1.77	2.03
1225	1	0	2	GG	GG	GG	CC	GG	25	148.4	43	64.75	19.52	103	70	4.8	64	0.19	0.67	1.22	2.43
1226	0	.	0	GA	GA	GA	GC	AG	23	173.8	81.7	84.1	27.04	127	82	4.6	55	0.8	0.79	1.14	2.14
1227	1	0	1	GG	GG	GG	CC	GG	23	164.6	67.5	77.733	24.91	109	68	5.2	53	0.2	0.69	1.76	2.43
1228	0	.	2	GG	GG	GG	CC	GG	23	176.9	60.3	68.7	19.26	117	70	5.1	25	0.19	0.66	1.08	2.52
1229	1	0	1	GA	GA	GA	GC	AG	20	155.6	53.9	66.95	22.26	97	65	4.5	41	0.19	1.03	1.66	2.34
1230	0	.	2	AA	GA	GA	GG	AA	23	171.2	86.6	97.65	29.54	124	74	4.7	79	0.5	1.71	0.92	2.43
1231	0	.	0	GA	GA	GG	GC	AG	20	184.1	69.5	76.1	20.5	118	55	4.5	22	0.6	0.66	1.27	1.9
1232	0	.	0	AA	AA	AA	GG	AA	26	174.8	67.7	78.25	22.15	123	72	4.5	31	0.2	0.46	1.66	2.04
1233	1	0	1	GG	GG	GG	CC	GG	28	161.25	52.6	66.6	20.22	88	60	4.7	103	0.4	1.08	1.66	2
1234	1	0	3	AA	AA	AA	GG	AA	20	176.4	66	73.25	21.21	113	60	4.9	47	0.2	0.44	1.55	2.48
1235	1	0	0	GA	GA	GA	GC	AG	20	162.6	66.5	75.35	25.15	100	61	4.7	51	0.6	0.59	1.23	2.34
1236	0	.	0	AA	AA	AA	GG	AA	26	182.9	69.2	74.367	20.68	123	71	4.9	41	0.5	0.71	1.14	1.36
1237	1	0	1	AA	AA	AA	GG	AA	26	146.1	47.9	69.4	22.44	110	59	4.5	22	0.19	1.03	1.4	3.25
1238	0	.	2	GA	GA	GA	GC	AG	22	171.5	89	96.85	30.25	120	65	5.1	69	3.2	0.93	1.33	4.13
1239	1	0	0	GA	GA	GA	GC	AG	23	177.9	75.5	75.8	23.85	112	66	4.5	13	0.3	0.56	1.4	2.19
1240	0	.	1	GA	GA	GA	GC	AG	22	181.7	73.8	82.3	22.35	111	70	5	24	0.6	0.64	1.09	2.38
1241	1	1	3	GA	GA	GA	GC	AG	20	156	56	68.3	23.01	111	74	4.4	33	1.8	0.78	1.42	2.72
1242	0	.	1	AA	AA	AA	GG	AA	22	178.7	69.8	75.833	21.85	123	56	5.3	70	0.19	0.59	1.48	1.99
1243	1	0	1	GA	GA	GA	GC	AG	20	154.6	44.5	64.2	18.61	108	64	4.3	13	0.3	0.41	2.63	1.81
1244	0	.	1	GA	GA	GA	GC	AG	22	168.2	50.4	64.3	17.81	112	64	4.7	13	0.19	1.02	1.43	2.95
1245	1	1	1	GA	GA	GA	GC	AG	22	157.8	50.6	67.6	20.32	107	66	4.1	28	0.3	0.68	1.59	1.98
1246	0	.	0	GG	GG	GG	GC	GG	25	161.8	83.6	99.45	31.93	114	81	5.1	67	5.6	3.09	1	4.46
1247	0	.	0	AA	AA	AA	GG	AA	22	182.7	62.5	74.05	18.72	123	72	5.7	50	1.9	1.64	1.42	4.3
1248	1	0	0	GA	GA	GA	GC	AG	25	168.7	65.9	78.95	23.15	110	77	4.7	45	0.7	0.9	1.88	2.66
1249	0	.	2	GA	GA	GA	GC	AG	21	171.1	84.3	90.7	28.79	117	58	4.8	20	0.4	0.79	1.31	3.75
1250	1	0	0	GA	GA	GG	GC	AG	20	171.6	64.3	71.05	21.83	112	64	5.2	57	0.19	0.86	1.71	1.94
1251	0	.	3	GG	GG	GG	CC	GG	21	180.2	114.6	125.3	35.29	149	106	5.1	154	2.6	0.98	1.08	2.54
1252	1	0	2	GA	GA	GA	GC	AA	25	155.6	71.5	79.65	29.53	114	85	4.9	84	0.6	1.14	0.87	3.02
1253	1	1	0	GA	GA	GA	GC	AG	20	150.6	44.2	63.3	19.48	92	60	4.9	48	3.6	1.25	1.83	3.12
1254	1	0	0	GA	GA	GA	GC	AG	21	162.2	55.9	65.4	21.24	101	53	4.8	24	0.6	0.28	1.62	1.18
1255	1	0	0	AA	AA	AA	GG	AA	20	172.9	65.5	75.2	21.91	109	67	4.4	34	0.5	0.62	1.19	2.11
1256	1	0	1	GA	GA	GA	GC	AG	20	156.5	40.5	58.3	16.53	93	61	4.6	13	0.2	0.67	2.61	3.09
1257	0	.	3	AA	AA	AA	GG	AA	23	165	70.6	78.5	25.93	119	72	5.4	18	5.1	0.66	1.53	3.44
1258	0	.	1	GA	GA	GA	GC	AG	20	172.9	57.6	67.75	19.26	100	69	4.5	30	0.1	1.05	1.17	2.16
1259	0	.	0	GA	GA	GA	GC	AG	28	183.6	67.4	75.25	19.99	114	70	4.7	13	0.3	0.47	1.49	2.63
1260	0	.	0	AA	AA	AA	GG	AA	22	174.2	64.9	71.85	21.38	119	79	4.7	40	0.3	1.06	1.16	1.64
1261	1	0	1	GA	GA	GA	GC	AG	20	159.8	53.9	63.75	21.1	107	77	4.4	13	0.19	0.54	1.12	2.6
1262	1	0	1	GA	AA	AA	GG	AG	21	158.7	52.9	64.65	21	94	60	4.9	13	0.2	3.37	1.41	2.05
1263	1	1	2	GA	GA	GA	GC	AG	23	158.4	40.2	54.05	16.02	99	64	5	77	0.5	0.7	2.46	1.93
1264	1	0	1	GG	GG	GG	CC	GG	21	166.9	49.5	64	17.77	97	68	4.2	18	0.19	0.47	1.63	2.99
1265	1	0	2	GG	GG	GG	CC	GG	22	159.6	64.6	75	25.36	101	57	4.8	57	0.6	0.8	1.25	2.17
1266	1	0	1	GA	GG	GG	CC	AG	20	157.4	53.4	68.7	21.55	105	62	4.7	27	0.19	1.46	0.75	1.97
1267	1	0	1	GA	GA	GA	GC	AG	29	157.7	50.2	62.65	20.18	110	73	5.3	21	1.7	0.63	2.2	2.23
1268	1	0	0	GA	GA	GA	GC	AG	20	173.2	94.2	87.75	31.4	103	76	5.3	84	0.2	0.81	1.67	2.91
1269	1	0	0	GG	GG	GG	CC	GG	29	171.2	109.6	100.15	37.39	114	79	5.3	24	1	0.78	1.2	2.38
1270	1	0	0	GA	GA	GA	GC	AG	21	172.1	54.9	67.45	18.53	104	62	4.4	17	0.7	0.82	1.84	2.35
1271	0	.	2	GA	GA	GA	GC	AG	20	166.9	79	89.95	28.36	119	70	5.3	42	0.6	0.98	0.79	2.87
1272	0	.	1	AA	AA	AA	GG	AA	23	168.2	70.5	82.75	24.91	114	68	4.3	24	0.19	0.61	1.63	3.1
1273	0	.	1	GA	GA	GA	GC	AG	24	167.8	59.8	69.25	21.23	124	87	5.7	52	0.3	0.64	1.85	3.33
1274	0	.	2	GA	GA	GA	GC	AG	20	173	64.9	81.35	21.68	128	73	4.8	75	0.2	0.84	0.86	2.14
1275	0	.	0	GA	GA	GA	GC	AG	21	179.4	71.4	80.2	22.18	118	60	4.9	13	0.5	0.63	1.07	1.79
1276	0	.	0	GA	GA	GA	GC	AG	24	166.3	60.5	76.85	21.87	99	62	5	13	0.19	0.91	1.21	1.77
1277	0	.	0	GA	GA	GA	GC	AG	27	176.9	108.6	110.9	34.7	125	75	5.3	130	12.8	1.14	0.85	2.22
1278	0	.	0	GA	GA	GA	GC	AG	29	184.9	95.7	92.8	27.99	137	76	5.5	29	0.8	3.11	1.29	2.54
1279	0	.	1	GG	GG	GG	CC	GG	28	181.5	81.3	83.1	24.67	139	81	5.1	30	0.3	1.33	0.89	1.77
1280	1	1	0	GG	GG	GG	CC	GG	21	164.8	62.7	74.6	23.08	109	71	4	23	0.3	0.76	1.58	1.4
1281	1	0	0	AA	AA	AA	GG	AA	27	166.1	82.5	80.75	29.9	103	74	4.9	68	0.6	1.32	1.29	2.72
1282	1	0	0	GA	GA	GA	GC	AG	28	153	68.7	80.4	29.34	118	73	5	90	0.6	1.48	1.5	3.49
1283	1	0	1	GG	GG	GG	CC	GG	20	153.4	50	68.75	21.24	101	60	5.1	64	0.19	0.82	1.82	1.8
1284	1	0	1	GA	GA	GA	GC	AG	22	165.4	58	65.45	21.2	105	61	4.6	53	0.19	0.55	1.5	1.87
1285	1	1	0	GA	GA	GA	GC	AG	24	161.9	89.6	90.85	34.18	116	83	4.5	84	0.7	0.78	1.81	2.03
1286	1	0	0	AA	AA	AA	GG	AA	21	160.9	56.8	72.2	21.93	93	62	5	15	1.4	1.01	1.38	2.41
1287	1	0	2	GA	GA	GA	GC	AA	20	148.6	51.6	68.25	23.36	88	64	4.5	26	1.7	0.55	2.02	1.9
1288	1	0	0	AA	AA	AA	GG	AA	20	168.7	54	67.55	18.97	99	68	5.1	61	0.2	1.18	2.07	2.14
1289	1	1	2	AA	AA	AA	GG	AA	20	153.5	46.7	59.933	19.81	98	72	4.7	25	0.19	0.54	1.68	2.06
1290	1	0	1	GA	GA	GA	GC	AG	20	158.1	56.8	67.8	22.72	111	60	4.4	13	0.5	0.68	1.62	2.3
1291	1	0	1	GA	GA	GA	GC	AG	21	160.5	60.7	71.6	23.56	97	64	4.9	15	0.5	0.34	1.26	2.02
1292	1	0	0	AA	AA	AA	GG	AA	23	154.4	49.9	66.1	20.93	96	62	4	13	0.8	0.32	2.24	2.02
1293	1	0	1	AA	AA	AA	GG	AA	22	153.1	47.9	63.75	20.43	128	99	4.8	20	0.4	0.57	1.55	2.68
1294	0	.	0	GG	GG	GG	CC	GG	28	184	104.8	90	30.95	146	98	4.8	47	0.3	2.18	1.47	2.92
1295	0	.	0	GG	GG	GG	CC	GG	21	178.3	76.4	78.85	24.03	119	70	4.7	19	0.3	1.05	1.12	3.17
1296	0	.	1	GG	GG	GG	CC	GG	20	170.2	53.9	63.9	18.6	127	75	4.9	30	0.3	0.49	1.52	1.98
1297	0	.	1	GA	GA	GA	GC	AG	22	167.2	65.8	74.35	23.53	124	64	4.7	16	3.1	0.83	1.12	1.66
1298	0	.	1	GG	GG	GG	CC	GG	22	173.7	70.7	81.1	23.43	120	74	5	27	0.19	0.65	0.92	3.33
1299	0	.	0	GA	GA	GA	GC	AG	22	187.6	82.5	80.8	23.44	131	57	5.1	37	0.6	0.67	1.52	1.16
1300	0	.	1	AA	AA	AA	GG	AA	20	174.7	75.7	83.1	24.8	129	67	5.2	57	0.4	2.77	1.1	2.87
1301	0	.	0	GG	GG	GG	CC	GG	22	170.5	65.9	81.6	22.66	118	67	5.3	31	0.9	0.5	1.61	2.64
1302	0	.	0	GG	GG	GG	CC	GG	24	183.5	64.6	72.1	19.18	119	75	5.3	16	0.3	0.54	1.74	1.88
1303	0	.	0	AA	AA	AA	GG	AA	22	159.1	59.4	79.867	23.46	128	77	5	37	16.6	2.02	1.24	1.73
1304	0	.	1	AA	AA	AA	GG	AA	29	166	65.6	74.8	23.8	133	79	5	25	2.4	0.54	1.2	2.54
1305	0	.	0	GA	AA	GA	GG	AG	25	170.7	85	91.45	29.17	115	72	4.8	50	0.4	1.18	1.04	3.28
1306	0	.	1	GA	GA	GA	GC	AG	28	162.9	66.6	82.8	25.09	134	72	4.8	19	0.2	1.42	1.53	3.16
1307	0	.	1	GA	GA	GA	GC	AG	22	172.4	80.5	86.433	27.08	131	89	5.7	77	5.3	1.13	1.31	2.75
1308	1	0	1	GA	GA	GA	GC	AG	22	164	59.4	70.8	22.08	97	66	4.9	17	0.19	0.46	2.28	2.1
1309	1	0	1	GA	GA	GA	GC	AG	21	176.6	72.5	79.6	23.24	100	70	5.3	63	0.3	0.87	1.26	1.9
1310	1	0	0	AA	AA	AA	GG	AA	20	151	46	60.9	20.17	91	55	5.2	39	0.2	0.39	1.33	1.37
1311	1	0	0	GA	GA	GA	GC	AG	20	165.6	77.3	76.5	28.18	110	69	5	69	0.5	0.91	1.2	2.93
1312	1	0	0	GA	GA	GA	GC	AG	23	169.8	68.3	75.85	23.68	111	67	5.2	50	0.4	0.33	1.6	1.6
1313	1	1	0	GA	GA	GA	GC	AG	23	174	74.2	72.767	24.5	110	72	5.3	66	0.6	1.12	2.11	2.74
1314	1	0	1	GA	GA	GA	GC	AG	22	167.5	60.3	70.05	21.49	109	74	3.9	13	0.2	0.84	1.23	2.94
1315	1	0	1	AA	AA	AA	GG	AA	20	156.4	47.5	64.5	19.41	88	56	5.3	28	0.2	1.13	1.47	2.28
1316	1	0	1	AA	AA	AA	GG	AA	22	168.1	58.4	69.9	20.66	110	74	5.3	84	0.4	1.31	1.37	2.66
1317	1	0	0	GG	GG	GG	CC	GG	24	161.6	56.9	71.3	21.78	116	73	5.1	21	0.3	0.77	1.01	2.03
1318	1	0	3	GA	AA	GA	GG	AG	21	163.7	69.5	74.2	25.93	111	70	5.3	49	0.2	1.82	2.23	2.53
1319	1	0	1	GA	GA	GA	GC	AG	25	165.6	60	67.25	21.87	98	60	4.7	47	0.19	0.68	1.26	1.43
1320	0	.	1	AA	AA	AA	GG	AA	20	169.8	59.7	67.4	20.7	114	66	5	48	0.19	0.5	1.7	2
1321	0	.	0	GG	GG	GG	CC	GG	20	178	59.3	68.35	18.71	128	82	5.3	19	0.5	0.87	1.25	2.03
1322	0	.	2	GG	GG	GG	CC	GG	20	170.5	62.9	73.1	21.63	120	69	4.8	46	0.5	0.73	0.96	2.9
1323	0	.	0	AA	AA	AA	GG	AA	20	175.5	94.4	97.35	30.64	148	87	5	64	0.9	1.36	1.07	2.96
1324	0	.	1	GG	GG	GG	CC	GG	24	177	85.7	86.3	27.35	116	67	5.1	39	0.6	1.14	1.07	3.56
1325	0	.	0	GA	GA	GA	GC	AG	25	178.5	84	90.3	26.36	140	78	5.5	38	0.8	1.41	1.07	2.92
1326	0	.	0	GG	GG	GG	CC	GG	20	170.2	62.7	77.033	21.64	121	62	4.8	13	0.3	0.96	1.43	2.69
1327	0	.	0	AA	AA	AA	GG	AA	26	163	65.4	79.5	24.61	121	77	5.2	36	0.6	0.74	1.27	2.94
1328	0	.	1	AA	AA	AA	GG	AA	21	173	64.1	72.767	21.41	125	77	4.7	98	0.6	9.21	0.78	.
1329	0	.	1	GG	GG	GG	CC	GG	21	178	65.1	69.45	20.54	119	66	5.8	15	0.3	0.85	0.96	2.2
1330	1	1	2	GA	GA	GA	GC	AG	25	158.5	68	74.2	27.06	102	73	5.1	60	4.2	1.3	1.19	2.88
1331	1	0	1	GA	GA	GA	GC	AG	21	167.4	55	69	19.62	92	59	4.5	39	0.2	0.76	1.36	2.21
1332	0	.	1	AA	AA	AA	GG	AA	22	153.8	57.5	69.4	24.3	96	68	5.4	39	0.2	0.55	1.39	1.68
1333	1	0	1	AA	AA	AA	GG	AA	20	153.4	56.4	73.25	23.96	108	67	4.4	15	1.7	0.61	1.36	2.31
1334	1	0	2	GG	GG	GG	CC	GG	22	160	55.9	77.45	21.83	106	73	4.8	52	1.5	0.64	1.35	2.86
1335	1	0	0	GA	GA	GA	GC	AG	24	158.8	58	69.85	22.99	108	71	4.3	17	5.1	0.42	1.43	2.11
1336	1	1	1	GA	GA	GA	GC	AG	29	160.5	51.5	59.65	19.99	119	76	4.9	13	0.5	0.66	1.67	2.22
1337	1	1	0	GA	GA	GA	GC	AG	21	166.4	67.5	74.85	24.37	102	67	4.7	68	3.8	1.04	1.88	2.61
1338	1	0	1	GG	GG	GG	CC	GG	20	157.4	53.3	67.45	21.51	97	58	5	71	0.8	0.82	1.09	2.44
1339	1	0	0	GA	GG	GA	CC	AG	26	159.3	61.4	72.9	24.19	102	69	4.9	13	0.19	0.54	1.45	2.22
1340	1	0	2	GA	GA	GA	GC	AG	23	154.8	57.1	77.05	23.82	86	61	5	67	2.6	0.77	1.33	2.29
1341	1	0	1	GA	GA	GA	GC	AG	22	155.8	46.7	62.2	19.23	104	78	5	13	0.2	0.55	1.17	1.8
1342	1	1	0	GA	GA	GG	GC	AG	27	167	69.7	79	24.99	114	73	4.6	20	6	1.44	2.2	2.49
1343	0	.	0	GA	GA	GA	GC	AG	22	189.9	92.5	87.75	25.65	137	87	5.4	59	0.2	0.93	1.67	2.4
1344	0	.	0	GG	GG	GG	CC	GG	27	189.3	77.5	82.4	21.62	112	69	5.1	22	0.6	0.46	1.33	1.38
1345	0	.	0	GA	GA	GA	GC	AG	20	180.4	103	100.933	31.64	145	73	5.1	128	1	0.79	0.99	2.53
1346	0	.	1	AA	AA	AA	GG	AA	20	167.5	54.1	68.7	19.28	104	65	4.6	18	0.2	0.88	1.31	1.92
1347	0	.	0	GG	GG	GG	CC	GG	21	187	85.1	87.9	24.33	130	73	5.5	18	0.8	0.98	1.46	2.72
1348	0	.	3	GG	GG	GG	CC	GG	25	170.4	94.7	101.1	32.61	129	68	5.1	53	0.4	1.42	1.06	2.24
1349	1	0	0	GA	GA	GA	GC	AG	21	163.4	62.8	75.4	23.52	112	76	5.4	60	1.7	0.66	1.6	3.34
1350	1	0	0	GA	GA	GA	GC	AG	23	175.2	63.4	72.033	20.65	118	74	4.6	25	0.19	0.4	1.91	2.58
1351	1	0	1	AA	AA	AA	GG	AA	20	163.4	54.5	65.6	20.41	121	77	5.1	67	0.3	0.98	1.75	2.1
1352	1	1	1	AA	AA	AA	GG	AA	21	149.5	50.1	70.55	22.41	109	83	4.4	87	2.9	0.81	1.45	2.2
1353	1	0	0	AA	AA	AA	GG	AA	25	166	51.5	65.733	18.68	111	64	4.4	15	0.2	0.62	1.47	2.27
1354	1	0	3	AA	AA	GA	GC	AA	27	163.1	49.6	69.7	18.64	110	71	4.9	53	0.3	0.61	1.46	2.38
1355	1	0	3	GA	GA	GA	GC	GG	27	166	50.5	69	18.32	105	62	5.1	39	0.3	1.12	0.89	2.25
1356	1	0	1	GA	AA	AA	GG	AA	22	164.8	74.7	80.65	27.5	109	66	5	45	2.8	0.8	1.76	2.65
1357	1	0	1	GA	GA	GA	GC	AG	23	154.1	48.8	66.85	20.55	95	71	5.1	45	0.19	0.51	1.26	2.91
1358	1	1	0	GA	GA	GA	GC	AG	24	168.2	78.2	84.6	27.64	100	69	4.7	28	5.2	1.01	1.51	2.35
1359	1	1	1	AA	AA	AA	GG	AA	25	164.4	61.6	72.267	22.79	109	69	4.7	51	2.4	1.87	2.09	1.94
1360	1	0	1	AA	AA	AA	GG	AA	20	172.9	59	71.1	19.73	103	70	4.9	43	0.19	0.78	1.32	2.98
1361	1	1	0	GA	GA	GA	GC	AG	22	167.2	57.4	68.5	20.53	103	69	4.5	13	1.1	1.62	1.7	2.62
1362	0	.	0	GA	GA	GA	GC		21	186.8	74.8	77.4	21.43	120	70	5.1	22	0.7	0.68	1.04	1.79
1363	0	.	2	GG	GG	GG	CC	GG	20	173.3	67.8	74.85	22.57	128	78	4.8	13	0.5	0.99	1.2	2.6
1364	0	.	0	AA	AA	AA	GG	AA	24	174.5	72.1	81	23.67	132	53	5.2	75	0.2	0.71	1.39	2.66
1365	0	.	1	AA	AA	AA	GG	AA	27	170.4	65.4	75.5	22.52	105	66	4.1	21	0.2	0.85	1.3	2.96
1366	0	.	0	AA	AA	AA	GG	AA	28	165.9	67.8	79	24.63	131	79	4.8	39	0.4	0.85	1.49	2.47
1367	0	.	0	GA	GA	GA	GC	AG	23	188.6	89.6	87	25.18	140	81	4.7	40	0.19	1	1.2	2.89
1368	1	0	2	GA	GA	GA	GC	AG	20	162.4	108.6	96.4	41.17	114	77	5	120	14.9	1.04	0.89	2.61
1369	1	0	1	AA	AA	GA	GG	AA	21	165.3	63.9	75.85	23.38	103	66	4.9	47	0.2	1.14	1.49	3.16
1370	1	0	0		GG	GG	CC	GG	26	152.4	49.5	62.25	21.31	103	66	5.5	17	0.7	0.68	1.9	2.78
1371	1	0	3	AA	GA	GA	GG	AA	20	163.1	49.2	64.2	18.49	118	71	4.8	70	0.3	0.43	1.28	2.97
1372	1	0	0	AA	AA	AA	GG	AA	23	169.9	60.1	68.2	20.82	95	59	4.3	13	1.1	0.52	1.09	1.97
1373	1	0	1	GA	GA	GA	GC	AG	21	158	62.2	76.25	24.91	99	72	4.4	48	1.7	0.89	1.43	3.15
1374	1	0	1	GA	GA	GA	GC	AG	20	161.8	52.4	66.55	20.01	107	63	5.1	73	0.2	0.91	1.95	2.4
1375	1	0	1	GA	GA	GA	GC	AG	20	159.5	56	76.6	22.01	108	75	5.2	37	3.5	0.79	1.07	2.75
1376	1	0	1	GG	GG	GG	CC	GG	22	158.8	54.2	70.4	21.49	108	76	4.7	13	0.19	0.97	2.06	2.71
1377	1	1	0	GA	GA	GA	GC	AG	21	166.6	59.3	70.8	21.36	101	63	4.8	62	2.1	1.45	1.98	2.86
1378	1	0	2	GA	GA	GA	GC	AG	22	157	76.4	87.8	30.99	105	71	4.9	55	1.3	1.44	1.02	2.65
1379	1	1	1	GA	GA	GA	GC	AG	24	159	60.5	78.233	23.93	111	75	5	119	0.4	2.05	2.26	2.14
1380	1	0	0	GA	GA	GA	GC	AG	21	163.5	70.2	75.7	26.26	116	73	5.1	44	1.9	0.51	1.52	2.49
1381	1	0	0	GA	GA	GA	GC	AG	27	159.3	63.1	72.05	24.86	107	67	4.9	132	0.5	0.73	1.94	2.12
1382	0	.	3	AA	AA	GA	GG	AG	23	182.3	82	88.6	24.67	127	73	5.1	101	0.7	2	1.27	2.82
1383	0	.	0	GA	GA	GA	GC	AG	20	168.2	52.4	67.05	18.52	118	78	4.7	13	0.4	0.52	1.27	1.74
1384	0	.	1	GA	GA	GA	GC	AG	25	185.1	77.5	86	22.61	130	78	5.2	47	2	0.55	1.15	2.48
1385	0	.	1	GA	GA	GA	GC	AG	21	177.5	71.4	81.05	22.66	118	77	5.6	46	0.2	0.75	1.44	2.4
1386	0	.	0	GA	GA	GA	GC	AG	20	171.3	64.4	71.05	21.94	121	72	4.9	39	0.9	0.7	1.43	1.28
1387	1	0	0	GA	GA	GA	GC	AG	21	170.1	67.2	72.7	23.22	109	61	5	57	0.2	0.65	1.48	1.83
1388	1	0	2	GA	GA	GA	GC	AG	24	165.4	78.4	76	28.65	110	77	4.9	74	0.2	0.63	1.2	2.32
1389	1	1	0	GA	GA	GA	GC	AG	26	158.8	56	66.85	22.2	99	68	4.5	36	2	0.81	1.39	2.34
1390	1	0	1	GA	GA	GA	GC	AG	21	157	53.4	71.85	21.66	102	67	4.8	25	0.2	0.59	2.07	2.73
1391	1	1	0	AA	AA	AA	GG	AA	20	165.4	62.2	69.25	22.73	108	65	4.9	71	0.3	1.08	1.09	2.31
1392	1	0	0	AA	AA	AA	GG	AA	22	165	65.8	75.7	24.16	110	61	5	54	1.2	0.9	1.78	3.06
1393	1	1	0	GG	GG	GG	CC	GG	21	166.6	69.5	81.6	25.04	133	84	4.5	53	7.4	1.32	1.56	3.35
1394	1	1	0	AA	AA	GA	GG	AA	24	173	64.3	68.067	21.48	109	57	4.8	89	0.5	1.74	1.34	3.28
1395	1	0	0	GA	GA	GA	GC	AG	28	165.4	64.1	70.9	23.43	114	66	4.8	13	0.8	0.61	1.09	2.49
1396	1	0	1	AA	AA	AA	GG	AA	23	164.9	50.7	65.6	18.64	110	70	4.6	23	0.19	0.63	1.2	0.97
1397	1	0	2	AA	AA	AA	GG	AA	22	152.5	51.7	71.3	22.23	118	70	4.7	37	1	1.1	1.35	2.82
1398	1	0	2	AA	AA	AA	GG	AA	20	169	51.3	66.45	17.96	99	60	5.3	35	0.9	0.61	1.86	2.3
1399	1	0	0	AA	AA	AA	GG	AA	29	174.4	74.5	73.45	24.49	120	73	5	13	0.3	0.93	1.68	2.72
1400	1	0	0	GA	GA	GA	GC	AG	24	162.4	97	99.6	36.77	123	81	5.4	105	3	1.59	1.11	2.82
1401	0	.	0	GA	GA	GA	GC	AG	27	182.2	72	77.8	21.68	119	72	4.9	22	0.9	1.62	1.01	3.39
1402	0	.	1	GA	GA	GA	GC	AG	24	165	68.6	76.55	25.19	117	67	4.9	38	1	1.28	1.05	3.43
1403	0	.	0	GG	GG	GG	CC	GG	28	187.6	77.7	83.9	22.07	131	73	5	13	0.2	0.78	2.02	2.75
1404	0	.	2	GG	GG	GG	CC	GG	28	175.4	65.6	74.15	21.32	115	70	5.1	36	0.19	0.84	1.2	2.53
1405	0	.	0	GA	GA	GA	GC	AG	28	170.4	66.4	73.15	22.86	124	75	4.7	13	0.19	0.85	0.73	2.34
1406	0	.	0	GA	GA	GA	GC	AG	23	179.5	78.3	78.55	24.3	131	66	4.6	13	0.2	1.26	1.11	2.57
1407	1	0	1	GA	GA	GA	GC	AG	23	155.6	49.1	63.6	20.27	104	70	4.5	37	0.9	0.98	1.74	2.95
1408	1	0	0	GG	GG	GG	CC	GG	23	174.4	67.6	72.3	22.22	111	69	4.4	25	1.6	1.06	1.3	3.23
1409	1	0	1	AA	AA	AA	GG	AA	20	153.1	51.4	69.7	21.92	103	65	4.5	33	0.3	0.9	1.6	2.05
1410	1	1	0	GG	GG	GG	CC	GG	22	169	64.8	78.85	22.68	122	74	4.7	32	2	0.77	1.7	2.15
1411	1	1	0	GG	GG	GG	CC	GG	20	165.5	60.4	70.2	22.05	101	68	4.7	39	5.9	1.81	1.46	2.5
1412	1	0	1	GA	GA	GA	GC	AG	21	158	55.4	72.05	22.19	113	66	4.5	13	0.19	1.03	1.23	3.18
1413	1	0	2	GG	GG	GG	CC	GG	23	162	63.9	78.35	24.34	113	65	4.5	50	0.6	1.04	1.2	1.48
1414	1	0	0	GA	GA	GA	GC	AG	21	172.9	67	68.15	22.41	115	79	4.8	42	1.1	1.14	1.46	3.35
1415	1	0	1	GA	AA	GA	GG	AG	20	153.7	48.3	65.3	20.44	97	68	4.9	58	0.4	1.15	1.01	2.36
1416	1	1	0	GA	GG	GA	CC	AG	28	174.5	60.5	69.35	19.86	110	68	4.8	38	0.7	1.18	1.99	3.82
1417	1	0	2	AA	AA	AA	GG	AA	22	157	47.2	62.75	19.14	104	62	4.7	30	0.2	0.34	1.48	2.06
1418	1	0	1	GA	GA	GA	GC	AG	23	157.4	48.2	64.65	19.45	104	67	4.4	23	0.2	0.63	1.8	2.81
1419	1	0	0	AA	GA	GG	GC	AA	28	167.5	88.7	73.85	31.61	109	79	5	91	5.2	1.26	1.68	2.45
1420	1	0	0	GG	GG	GG	CC	GG	25	162.5	62.3	73.3	23.59	118	78	5	49	0.2	0.63	2.01	2.63
1421	1	1	2	GA	GA	GA	GC	AG	22	168.5	68.7	75.7	24.19	115	81	4.6	51	21.5	0.99	1.12	2.86
1422	0	.	1	AA	AA	AA	GG	AA	23	166.5	74.7	85.1	26.94	123	79	4.8	74	0.8	0.74	1.12	2.52
1423	0	.	1	GA	GA	GA	GC	AG	26	185.6	68.7	74.85	19.94	119	71	4.8	13	0.4	0.44	1.54	2.51
1424	0	.	0	GG	GG	GG	CC	GG	26	178	84.1	89.1	26.54	113	66	4.9	26	5.4	0.81	1.03	2.22
1425	0	.	0	AA	AA	AA	GG	AA	24	176.5	71.4	80.1	22.91	130	78	5	45	0.19	1.37	1.13	2.76
1426	0	.	1	GA	GA	GA	GC	AG	24	177.8	73.5	77.85	23.25	134	74	5.2	21	0.19	0.37	1.45	2.1
1427	1	0	1	GA	GA	GA	GC	AG	21	163	55.4	73.35	20.85	118	80	4.8	51	0.19	0.72	1.54	2.07
1428	1	0	0	GA	GA	GA	GC	AG	24	168.5	59	73.9	20.78	126	67	4.4	13	0.6	0.48	1.51	2.36
1429	1	0	0	GG	GG	GG	CC	GG	24	170.4	100.1	103.6	34.47	114	76	4.8	73	1.6	1.8	1.09	3.79
1430	1	0	1	GA	GA	GA	GC	AG	25	157.4	58.9	78	23.77	116	89	5.1	51	0.3	0.94	1.48	1.88
1431	1	0	2	GG	GG	GG	CC	GG	20	160.2	56.9	68.15	22.17	96	68	4.4	62	0.9	0.51	1.73	2.29
1432	1	0	1	GA	GA	GA	GC	AG	26	151.4	52.6	72.1	22.94	103	62	4.3	95	0.3	0.66	1.41	3.32
1433	1	0	0	GG	GG	GG	CC	GG	22	161.3	58	74.75	22.29	108	55	4.9	51	0.8	0.89	1.32	1.35
1434	1	0	3	AA	AA	GA	GC	AA	21	162.8	54.6	68.55	20.6	115	63	5.2	60	0.5	0.55	1.74	2.01
1435	0	.	0	GG	GG	GG	CC	GG	20	183.1	93.5	90.25	27.88	138	76	4.7	24	0.5	0.59	1.18	2.07
1436	0	.	2	GA	GA	GA	GC	AG	24	171.7	87.6	92.3	29.71	135	89	4.9	59	2.4	3.82	0.88	1.81
1437	0	.	0	GA	GA	GA	GC	AG	24	184.2	77.2	75.1	22.75	127	64	4.6	36	0.4	0.6	1.27	1.93
1438	1	0	1	GA	GA	GA	GC	AG	20	162.5	63.4	72	24	118	77	4.8	50	0.2	0.89	1.29	2.81
1439	1	1	1	GA	GA	GA	GC	AG	20	151.8	41.3	60.65	17.92	114	67	4.8	21	0.9	0.97	1.21	2.29
1440	1	0	0	AA	AA	AA	GG	AA	26	159.4	61	70.5	24	99	69	4.7	53	0.8	1.01	1.3	2.2
1441	1	0	1	GA	GA	GA	GC	AG	20	170.2	63.3	68.75	21.85	115	76	4.4	48	0.19	0.63	1.68	2.03
1442	1	1	2	GA	GA	GA	GC	AG	27	156.5	54	66.95	22.04	124	83	4.8	36	0.8	1.16	1.76	2.54
1443	1	1	0	GA	GA	GA	GC	AG	27	157.4	58.8	72.2	23.73	117	75	4.9	32	0.8	0.92	1.3	3.33
1444	1	1	0	GA	GA	GA	GC	AG	24	176.6	71.2	73.9	22.82	140	83	4.7	41	2.4	0.98	2.05	3.11
1445	1	0	0	GA	GA	GA	GC	AG	21	158.5	53.8	67	21.41	124	90	5.2	32	0.5	0.72	1.62	2.16
1446	1	1	0	GA	GA	GA	GC	AG	24	154.8	50.9	66.1	21.24	106	65	4.6	34	3	0.96	1.69	2.83
1447	1	0	1	GA	GA	GA	GC	AG	21	160.4	51.9	66.75	20.17	101	64	4.8	25	0.7	0.63	1.36	1.72
1448	1	0	0	GA	GA	GA	GC	AG	20	165.5	58.8	72	21.46	99	69	4.7	75	0.5	0.73	1.5	2.22
1449	1	0	0	AA	AA	AA	GG	AA	21	166.7	68.8	69.95	24.75	116	72	4.5	13	0.9	0.65	1.14	1.1
1450	0	.	0	GG	GG	GG	CC	GG	20	186.8	90.8	85.2	26.02	117	68	5	97	1.7	0.83	1.38	1.67
1451	0	.	1	GA	GA	GA	GC	AG	23	177.7	87.9	93.1	27.83	140	80	5.4	77	0.3	1	0.97	2.77
1452	0	.	1	GA	GA	GA	GC	AG	22	178.4	66	68.4	20.73	126	83	4.9	16	0.2	0.39	1.38	1.97
1453	1	0	1	GG	GG	GG	CC	GG	20	159.1	54.6	68.5	21.57	106	63	4.9	110	0.2	1.28	1.67	3.04
1454	1	0	0	AA	AA	GA	GG	AA	21	161.8	48.6	63.3	18.56	98	60	3.9	13	0.2	0.95	1.76	3.08
1455	1	1	0	GA	GA	GA	GC	AG	26	172.4	68.5	69.65	23.04	123	68	4.5	98	2.2	0.68	1.76	1.72
1456	1	1	0	GA	GA	GA	GC	AG	24	167.5	56.1	65.3	19.99	111	67	4.7	38	2.6	2.01	1.76	1.44
1457	1	0	1	AA	AA	AA	GG	AA	27	161.7	54.7	69.35	20.92	128	80	4.7	38	0.19	0.69	1.49	3.13
1458	1	1	1	GA	GA	GA	GC	AG	22	165	60.2	70.133	22.11	112	65	5	32	1.7	0.53	1.87	1.96
1459	1	0	0		GA	GG	GC	GG	25	171.4	69.5	80.3	23.65	118	71	5	38	0.2	0.53	1.67	1.99
1460	1	1	0	GA	GA	GA	GC	AG	27	164.5	60.7	68.4	22.43	107	56	5.4	34	1.5	0.87	2.11	2.71
1461	0	.	0	GG	GG	GG	CC	GG	25	180	72.9	85.65	22.5	137	78	4.8	30	0.19	0.61	1.48	2.35
1462	0	.	0	AA	AA	AA	GG	AA	20	171.6	95.2	101	32.32	120	73	5.5	90	0.2	1.12	1.29	1.75
1463	0	.	0	GA	GA	GA	GC	AG	21	171	60.3	68.55	20.62	136	68	5	51	0.19	0.99	1.21	2.27
1464	0	.	2	GA	GA	GA	GC	AG	28	180.5	70.7	77.3	21.7	141	85	5.2	73	0.3	1.87	0.96	2.23
1465	0	.	0	GG	GG	GG	CC	GG	21	174.7	65.8	73.4	21.55	129	70	4.6	13	0.2	0.45	0.91	1.91
1466	1	0	1	GA	GA	GA	GC	AG	24	155.1	48.7	62.8	20.24	102	66	4.7	13	0.7	0.7	1.58	2.17
1467	1	1	0	GA	AA	GA	GG	AG	20	164.1	53.9	68.75	20.01	112	77	4.7	36	0.2	1.2	1.82	1.74
1468	1	1	0	GA	GA	GA	GC	AG	23	174.4	69.7	73.1	22.91	107	61	4.7	44	1.7	1.85	1.95	1.89
1469	1	0	0	GA	GA	GA	GC	AG	25	172.5	73.7	75.45	24.76	111	78	4.9	59	0.9	0.55	1.49	2.84
1470	1	0	0	GA	GA	GA	GC	AG	23	160.2	53.2	64.2	20.72	101	52	4.9	19	0.3	0.65	1.64	2.06
1471	1	1	3	AA	GA	GA	GG	AA	26	167.6	93.7	93.667	33.35	128	78	5.3	62	4.5	1.24	1.19	4.89
1472	1	0	0	GA	GA	GA	GC	AG	24	168.5	86.9	89.4	30.6	130	82	5.3	647	1.8	1	1.15	3.14
1473	1	0	1	GA	GA	GA	GC	AG	20	161.2	53.8	67.5	20.7	108	70	5	45	0.2	0.63	1.6	1.92
1474	1	0	0	AA	AA	AA	GG	AA	26	158.5	47.8	60.8	19.02	105	63	4.8	13	0.6	0.57	1.91	2.24
1475	0	.	1	GA	GA	GA	GC	AG	21	172.2	83.4	87.933	28.12	142	82	5.2	13	0.2	0.61	1.58	2.96
1476	0	.	2	GA	GA	GA	GC	AG	20	174.6	101.6	96.8	33.32	119	73	5.7	292	1.3	2.41	1	3.5
1477	0	.	3	AA	AA	GA	GG	AA	22	175.6	60.2	70.15	19.52	130	80	4.5	66	0.3	1.64	1.38	4.47
1478	0	.	1	AA	AA	AA	GG	AA	20	173	65.4	79.2	21.85	123	66	4.1	13	0.3	1.55	1.06	1.68
1479	0	.	3	GA	GG	GG	GC	AG	25	177.7	98.6	99.4	31.22	138	89	6.1	57	1.1	0.7	1.1	3.11
1480	0	.	1	GA	GA	GA	GC	AG	22	168.5	76.4	82.35	26.9	121	77	5.2	35	0.3	2.6	1.21	3.69
1481	0	.	0	GG	GG	GG	CC	GG	24	177.8	81	84.6	25.62	122	56	5	34	0.3	1.12	1.41	2.02
1482	1	1	0	GA	GA	GA	GC	AG	24	171.7	60.8	68.05	20.62	107	64	4.6	18	2.6	0.74	1.51	1.75
1483	1	0	2	GG	GG	GG	CC	GG	21	163.6	56.4	71.5	21.07	107	72	3.7	34	0.3	0.85	2.15	1.93
1484	1	1	0	AA	AA	AA	GG	AA	20	165.3	53.3	64.5	19.5	100	73	4.7	62	0.2	1.04	1.41	2.29
1485	1	0	1	GA	GA	GA	GC	AG	28	154.4	54.5	76.6	22.86	106	66	5.2	37	0.3	1.45	2.05	2.77
1486	1	0	0	AA	AA	AA	GG	AA	25	159.8	65.7	78.2	25.72	113	73	5	98	2	0.62	2.06	3.56
1487	1	1	0	AA	AA	GA	GG	AA	24	172.7	59.1	66.5	19.81	116	70	4.6	48	0.8	1.19	1.79	2.09
1488	0	.	0	GA	GA	GA	GC	AG	28	180.5	89.7	81.95	27.53	144	82	5.2	13	1.1	0.53	1.39	2.56
1489	1	1	0	GA	GA	GA	GC	AG	24	174.1	71	76.85	23.42	120	75	4.5	56	3.9	1.69	1.84	3.25
1490	1	0	0	GG	GG	GG	CC	GG	20	176	72.3	70.85	23.34	120	83	4.8	25	1	0.93	1.29	1.58
1491	1	0	0	GA	GA	GA	GC	AG	24	176	63.6	68.45	20.53	110	67	5.2	24	0.3	0.62	2.07	1.91
1492	1	0	0	GG	GG	GG	CC	GG	25	164	56.5	67.85	21	105	67	4.7	13	0.2	0.51	1.61	1.99
1493	1	0	0	AA	AA	AA	GG	AA	27	167.5	92.2	87.15	32.86	134	85	5.4	62	2.3	0.44	1.4	1.84
1494	1	0	2	GG	GG	GG	CC	GG	20	170.9	66	67.7	22.59	107	61	5.1	59	0.2	0.49	1.55	1.5
1495	0	.	0	GA	GA	GA	GC	AG	20	181	86.8	87.55	26.49	130	80	5.2	13	1.2	0.66	1.07	1.95
1496	1	1	0	AA	AA	AA	GG	AA	25	156.5	54.5	77.05	22.25	101	70	4.5	37	4.5	2.09	1.7	3.18
1497	0	.	2	GA	GA	GA	GC	AG	20	176.7	75.9	80.85	24.3	110	57	4.7	47	0.6	0.9	0.88	2.92
1498	0	.	1	GG	GG	GG	CC	GG	21	173.4	55	69.75	18.29	118	67	5.3	19	0.19	1.17	1.37	2.87
1499	1	0	0	GA	GA	GA	GC	AG	25	162.2	78.6	80.333	29.87	122	85	5.4	50	0.4	2.22	0.97	2.63
1500	0	.	1	AA	AA	AA	GG	AA	26	173.5	72.8	78.65	24.18	138	72	5.5	24	0.7	0.81	1.22	2.75
1501	1	1	0	GA	GA	GA	GC	AG	24	160	61.7	71.4	24.1	124	80	5.1	52	2.3	0.95	1.39	2.71
1502	0	.	0	GA	GA	GA	GC	AG	24	183	88.9	84.85	26.54	129	70	5	26	4.2	0.74	1.05	1.79
1503	1	0	1	GA	AA	GG	GC	AG	20	176	68.7	70.95	22.17	114	67	4.6	13	0.8	0.43	1.74	1.29
1504	1	0	1	AA	AA	AA	GG	AA	22	152	57.3	77.25	24.8	115	85	5.2	40	0.19	1.38	1.12	3.2
1505	1	0	2	AA	AA	AA	GG	AA	25	152	45.6	64.35	19.73	101	70	4.9	22	0.5	0.93	1.35	2.22
1506	1	0	1	GA	GA	GA	GC	AG	22	155.3	48	62.7	19.9	113	77	4.7	13	0.2	0.77	1.82	2.84
1507	0	.	1	GG	GG	GG	CC	GG	22	167.9	71.2	77.15	25.25	126	66	5.3	31	0.2	0.77	1.48	3.34
1508	0	.	1		GG	GG	CC		23	171.6	68.1	75.75	23.12	134	82	4.7	73	0.4	1.47	1.12	2.43
1509	0	.	3	AA	AA	GA	GG	AA	20	174.6	86.7	82.15	28.44	131	67	4.8	28	2	0.65	1.34	2.45
1510	1	0	3	GA	GA	GA	GC	AG	20	169.5	65.5	75.85	22.79	110	61	4.9	45	0.6	0.42	1.64	2.11
1511	1	0	1	AA	AA	AA	GG	AA	23	159.8	56.9	68.5	22.28	103	69	5.2	13	0.6	0.72	1.4	3.35
1512	1	0	1	GA	GA	GA	GC	AG	21	161.8	51.3	66.15	19.59	103	71	4.7	26	0.19	0.48	0.69	2.28
1513	1	0	1		GA	GA	GC	AG	22	165	55.6	73.15	20.42	107	68	5.1	63	0.8	0.82	1.14	2.3
1514	1	0	1	AA	AA	AA	GG	AA	20	157.6	48.3	65.75	19.44	101	60	5.2	27	0.19	0.67	1.49	2.43
1515	1	0	1	GA	GA	GA	GC	AG	22	161.5	52.1	62.3	19.97	106	75	4.7	64	0.19	0.76	1.18	1.53
1516	0	.	0	AA	AA	AA	GG	AA	22	185.5	90.5	89.5	26.3	129	67	4.4	22	0.4	0.44	1.24	1.95
1517	0	.	1	GA	GA	GA	GC	AG	20	183.4	63.8	70.55	18.96	111	72	4.5	13	0.2	0.38	1.82	1.77
1518	0	.	0		AA	AA	GG	AA	21	176.5	63.2	73.8	20.28	135	73	5.8	19	0.3	1.21	1.84	2.24
1519	0	.	0	GA	GA	GA	GC	AG	20	184.1	116.2	105.85	34.28	139	84	4.6	68	1	1.39	0.92	2.04
1520	0	.	2	GA	GA	GA	GC	AG	24	182.1	69.9	75.15	21.07	114	68	5.1	13	1.2	0.93	1.13	2.4
1521	0	.	2	GA	GA	GA	GC	AG	29	170.8	69.5	82.3	23.82	139	90	6.1	110	0.3	8.55	0.95	.
1522	0	.	3	GA	GA	GA	GC	AG	27	179.5	64.3	73.5	19.95	112	73	4.8	13	0.2	1.15	0.94	2.07
1523	0	.	2	GA	GA	GA	GC	AG	24	163	71.5	86	26.91	110	77	5.2	13	2.6	0.54	0.99	3.32
1524	1	0	1	GA	GA	GA	GC	AG	20	159.1	47.8	66.35	18.88	102	64	4.5	28	0.19	1.09	1.48	4.26
1525	1	0	1	AA	AA	AA	GG	AA	22	163.8	55	63.6	20.49	88	58	4.3	13	0.19	0.73	1.75	2.89
1526	1	0	1	GA	GA	GA	GC	AG	22	155.9	51.8	68.6	21.31	86	55	4.8	22	1.1	0.82	1.62	2.11
1527	1	0	2	GA	GA	GA	GC	AG	21	161.9	54.3	67.55	20.71	99	69	4.7	61	4.8	0.76	1.16	2.2
1528	0	.	1	GA	GA	GA	GC	AG	20	172.4	63.5	73.4	21.36	112	69	5.5	54	0.19	0.62	1.24	2.27
1529	0	.	0	AA	GA	GG	GC	AA	23	180.5	83.2	84.9	25.53	122	78	5.1	33	0.4	2.43	0.92	1.96
1530	0	.	0	GA	GA	GA	GC	AG	27	174.4	77.9	83.6	25.61	131	86	5.2	28	1.7	0.88	1.36	2.51
1531	0	.	3	GG	GG	GG	CC	GG	20	178.9	114.1	118	35.65	138	79	6.2	142	2.1	1.05	1.35	2.46
1532	0	.	0	GA	GA	GG	GC	AG	28	180	93.3	91.2	28.79	141	88	4.5	13	0.9	1.2	0.94	2.82
1533	0	.	1	GG	GG	GG	CC	GG	26	167	54	72	19.36	119	73	5	20	0.4	0.53	1.51	3.17
1534	0	.	0	AA	AA	AA	GG	AA	23	181.8	79.8	80.7	24.14	144	81	4.8	24	0.19	1.05	1.64	3.06
1535	0	.	0	AA	AA	AA	GG	AA	21	180.5	89.1	87.15	27.34	135	77	4.7	58	0.2	1.2	1.29	2.64
1536	1	0	0	AA	AA	AA	GG	AA	23	163.4	50.3	64.55	18.83	109	59	4.2	31	0.2	0.49	1.6	2.13
1537	1	0	0	GA	GA	GA	GC	AG	24	163.8	81.8	84.85	30.48	102	69	5.2	18	1.4	0.75	1.59	2.27
1538	1	0	1	AA	AA	AA	GG	AA	25	156.7	53.7	70.45	21.86	96	66	4.6	13	0.4	0.69	1.21	2.64
1539	1	0	0	GG	GG	GG	CC	GG	21	166.5	58.8	69.6	21.21	138	79	4.7	18	0.2	0.52	1.97	1.48
1540	1	0	0	AA	AA	AA	GG	AA	23	167.8	63	72.3	22.37	125	84	4.3	13	1.2	0.45	1.25	1.37
1541	0	.	2	GA	GA	GA	GC	AG	24	167.5	76.2	87.55	27.15	139	80	4.6	34	0.4	0.94	0.94	3.15
1542	0	.	0	GA	GA	GA	GC	AG	22	185	75.9	77	22.17	127	69	5	13	1.2	1.31	0.73	2.31
1543	0	.	0	GA	GA	GA	GC	AG	25	173.4	70.1	81.4	23.31	118	63	5.3	13	0.5	0.76	1.25	3.01
1544	1	1	1	GA	GA	GA	GC	AG	20	146.2	51.5	65.65	24.09	100	61	4.5	57	5.3	1.72	1.71	3.46
1545	1	0	3	GA	GA	GA	GC	AG	20	153.5	74	86.2	31.4	118	73	4.7	83	0.3	0.51	1.94	3.19
1546	1	0	1	GG	GG	GG	CC	GG	28	158.6	46.2	63	18.36	147	107	5.1	29	0.2	1.04	1.92	2.84
1547	1	0	1	GG	GG	GG	CC	GG	22	166.4	70.3	93.5	25.38	94	67	4.9	49	1.8	1.57	1.22	2.53
1548	1	1	0	GA	GA	GA	GC	AG	22	162.8	52.6	69	19.84	97	63	4.7	20	0.3	0.52	1.58	3.08
1549	1	0	1	GA	GA	GA	GC	AG	23	155.8	57.6	66.4	23.72	113	75	4.8	15	0.7	0.56	2.09	2.84
1550	1	0	1	AA	AA	AA	GG	AA	20	156.3	53.7	68.2	21.98	93	54	4.6	23	0.3	1	1.46	2.36
1551	1	1	0	GA	AA	GA	GG	AG	26	174.6	64.9	73.25	21.28	103	65	4.2	13	0.8	0.55	1.77	1.81
1552	1	0	3	GA	AA	GA	GG	AG	21	163.9	67.2	73.1	25.01	111	70	4.6	47	1.9	0.93	1.14	1.22
1553	1	0	3	GG	GG	GG	CC	GG	28	155.5	62.5	76.8	25.84	109	75	5.1	53	3.8	1.52	1.25	2.54
1554	1	1	0	GA	GA	GA	GC	AG	23	165.8	62.1	71.4	22.59	133	69	4.4	17	0.4	0.9	2.21	1.67
1555	1	0	0	GA	GA	GA	GC	AG	20	168.1	67.1	72.85	23.74	108	63	4.3	15	0.2	0.75	1.36	2.14
1556	1	1	1	GG	GG	GG	CC	GG	21	164.7	54.5	64.3	20.09	100	64	5.3	82	11.5	1.18	1.53	1.67
1557	0	.	3	GA	GA	GA	GC	AG	21	175.5	81	78.35	26.29	120	66	5	22	0.2	0.86	1.13	1.47
1558	0	.	1	GA	GA	AA	GC	AG	27	171.3	85.5	93.1	29.13	122	87	5.2	30	4	0.77	1.37	3.53
1559	0	.	0	GA	GG	GG	CC	AG	26	191	87.3	82.55	23.93	136	93	5.6	42	0.7	1.22	1.12	2.1
1560	0	.	0	GA	GA	GA	GC	AG	26	163.9	87	95.9	32.38	117	75	4.8	95	0.4	1.9	1.01	3.93
1561	0	.	1	AA	AA	AA	GG	AA	21	173	69.1	81	23.08	109	63	4.5	13	3.7	0.59	1.05	2.29
1562	1	0	0	GA	GA	GA	GC	AG	20	164.3	49.3	59.1	18.26	96	64	4.8	58	0.2	0.43	1.59	1.95
1563	1	1	0	GA	GA	GA	GC	AG	25	155.7	49.4	66.2	20.37	100	67	4.8	32	3.3	0.93	1.48	3
1564	1	0	1	GA	GA	GA	GC	AG	20	153.9	54	68.75	22.79	108	68	5.3	52	0.6	0.88	1.75	2.05
1565	1	0	0	GA	GA	GA	GC	AG	21	170.4	54.8	65	18.87	106	69	4.2	24	0.2	0.37	1.5	2.1
1566	1	0	1	AA	AA	AA	GG	AA	21	168	73.8	84.05	26.14	107	66	4.7	35	3.4	0.75	1.16	2.17
1567	0	.	1	GG	GG	GG	CC	GG	23	178.5	82.2	89.75	25.79	121	75	5.2	58	0.4	3.18	1.07	2.5
1568	0	.	0	AA	AA	GA	GG	AA	23	168.5	53.1	67.1	18.7	113	62	4.4	13	10.2	0.5	0.89	2.07
1569	0	.	0	GA	GA	GA	GC	AG	24	185	72.4	80.233	21.15	121	66	4.8	13	0.3	0.46	1.45	2.23
1570	0	.	0	GA	AA	GA	GG	AA	25	177.5	76.8	78.5	24.37	114	61	4.1	13	0.2	0.7	1.54	1.8
1571	0	.	0	AA	AA	AA	GG	AA	28	189.8	107.1	95.333	29.73	132	69	4.9	27	0.4	0.87	1.03	3.27
1572	1	1	0	GG	GG	GG	CC	GG	22	191.9	84	79.25	22.81	95	64	4.6	20	5.7	1.56	1.65	2.88
1573	1	0	0	AA	GA	GA	GG	AA	25	160.6	67.4	70.5	26.13	107	63	4.1	13	0.6	0.63	1.2	1.98
1574	1	1	0	GA	GA	GA	GC	AG	23	166	58	69.333	21.04	115	79	4.3	13	1.5	0.8	1.6	2.78
1575	1	0	1	GA	GA	GA	GC	AG	20	163.9	59.7	69.75	22.22	112	70	4.5	15	0.2	0.43	1.77	1.38
1576	1	0	1	GA	GA	GA	GC	AG	23	158.7	56.1	74	22.27	101	60	4.7	13	1.7	0.86	1.57	2.55
1577	1	1	1	AA	AA	AA	GG	AA	22	158.1	55.1	71	22.04	99	68	4.8	36	0.4	0.87	1.7	3.07
1578	1	1	0	AA	AA	AA	GG	AA	24	159.4	80.2	95	31.56	120	82	4.7	97	2	1.58	1.2	2.51
1579	1	0	0		AA	AA	GG	AA	20	166.5	57.3	73.333	20.66	100	66	3.9	43	0.6	0.95	1.02	1.72
1580	1	0	1	GG	GG	GG	CC	GG	24	154.7	47.2	66.5	19.72	116	77	4.7	29	0.5	0.73	1.95	2.9
1581	1	0	1	GA	GA	GA	GC	AG	21	156.8	59.9	78	24.36	102	63	4.6	13	0.5	0.57	2.39	2.12
1582	1	0	3	AA	AA	AA	GG	AA	29	162.7	47.9	64	18.09	126	80	4.7	36	0.3	1.54	1.8	2.23
1583	1	0	0	GA	GG	GA	CC	AG	28	173.6	71.5	78	23.72	123	76	5.1	318	0.2	.	.	.
1584	0	.	0	AA	AA	AA	GG	AA	29	189.9	97.9	92.5	27.14	137	64	4.6	13	1.3	1.25	1.2	2.18
1585	0	.	0	AA	AA	AA	GG	AA	25	179.2	65.6	76.95	20.42	110	60	4.4	13	0.4	0.66	1.53	3
1586	0	.	1	GA	GA	GA	GC	AG	26	165	70.6	85.3	25.93	114	69	4.9	34	0.7	0.86	1.22	2.79
1587	0	.	1	GA	GA	GA	GC	AG	21	169.5	80.1	80.9	27.88	125	63	4.2	53	0.19	0.68	1.3	1.62
1588	0	.	0	GA	GA	GA	GC	AG	21	173.5	79.4	88.55	26.37	121	69	5	13	10.4	1.68	0.82	1.84
1589	1	0	3	GA	GA	GA	GC	AG	27	166.9	50.5	64.5	18.12	113	70	4.8	19	0.19	0.85	1.77	2.22
1590	1	1	2	GG	GG	GG	CC	GG	21	169.9	58.3	67.667	20.19	99	64	5.3	68	1.3	0.9	1.62	3.2
1591	1	1	3	AA	AA	GA	GG	AA	27	164.9	72.9	70.8	26.8	110	66	4.3	75	1.5	0.96	1.34	1.75
1592	1	0	2	GA	GA	GA	GC	AG	28	167.2	66.7	72.3	23.85	106	66	4.8	13	2	0.39	1.18	2.09
1593	1	0	0	GA	GA	GA	GC	AG	29	166.7	66.9	76.267	24.07	109	77	4.9	30	0.2	0.65	1.5	1.74
1594	1	0	0	AA	AA	AA	GG	AA	26	167.5	64.4	73.733	22.95	111	69	5.3	13	1.2	.	.	.
1595	1	0	0	GA	GA	GA	GC	AG	22	166.3	59.6	68.1	21.55	109	67	4.4	13	1.2	0.62	2.59	2.49
1596	1	0	1	GA	GG	GA	CC	AG	21	149.7	38.8	60.25	17.31	101	65	4.4	13	0.19	0.9	1.46	3.77
1597	1	1	0	AA	AA	GA	GG	AA	23	173.5	74.2	79.55	24.64	109	70	4.4	54	7.5	2.07	1.49	2.55
1598	1	0	1	AA	AA	AA	GG	AA	22	164.1	53.5	71	19.86	94	57	4.7	13	0.19	0.45	1.79	2.35
1599	0	.	0	AA	AA	AA	GG	AA	23	183.9	73	75.5	21.58	115	61	4.5	13	0.2	0.72	1.37	1.96
1600	0	.	0	AA	AA	AA	GG	AA	21	171.2	75.6	90	25.79	114	63	4.9	59	1.2	3.34	0.94	2.43
1601	0	.	0	GA	GA	GA	GC	AG	20	177.4	70.3	81.65	22.33	118	71	4.8	13	0.3	1.02	1.06	2.48
1602	0	.	0	GA	AA	GA	GG	AG	23	183.7	92.8	89.65	27.49	135	73	5	31	0.7	1.95	0.86	1.83
1603	0	.	0	GA	GA	GA	GC	AG	24	173	70.4	77.3	23.52	114	70	5.2	13	0.2	0.88	1.21	1.89
1604	1	0	2	GA	GA	GA	GC	AG	20	163.6	52.1	64.633	19.46	96	62	5.3	24	1.9	1.03	1.16	2.35
1605	1	0	1	AA	AA	AA	GG	AA	21	152.9	45.6	64.1	19.5	91	58	4.7	18	0.19	.	.	.
1606	1	1	0	GA	GA	GA	GC	AG	20	165.5	61.4	68.85	22.41	100	68	4.7	46	4.1	0.99	1.7	1.48
1607	1	0	0	GA	GA	GA	GC	AG	28	161.4	59.1	69.45	22.68	107	71	5	32	0.7	.	.	.
1608	1	0	1	AA	AA	AA	GG	AA	21	158.6	49	65.6	19.48	101	66	4.8	13	0.3	.	.	.
1609	0	.	1	GA	GA	GA	GC	AG	20	171.4	68.2	75.95	23.21	113	64	4.5	31	0.2	0.4	2.27	1.5
1610	0	.	0	GA	GA	GA	GC	AG	22	182.2	73.4	75.4	22.11	136	67	4.9	29	1.5	0.66	1.81	2.38
1611	0	.	0					GG	25	179.2	85.9	87.5	26.74	125	71	.	.	.	.	.	.
1612	1	0	2		AA	AA	GG	AA	20	157	65.8	76.65	26.69	111	67	4.4	13	1.8	1.23	1.51	2.49
1613	1	0	0	GA	GA	GA	GC	AG	24	172.9	70.4	76.85	23.54	111	62	4.9	15	3.8	1.27	1.22	2.75
1614	1	0	1	GG	AA	GA	GC	AG	20	164.2	61.3	71.5	22.73	111	72	4.9	43	0.2	0.63	1.27	2.06
1615	1	0	1		AA	AA	GG	AA	20	164.6	60.5	71.067	22.33	96	58	4.4	13	0.3	0.53	1.35	2.23
1616	1	0	1	AA	AA	AA	GG	AA	21	157.2	50.3	66	20.35	107	66	4	13	0.4	0.82	1.85	2.18
1617	1	1	0	GA	GA	GA	GC	AG	22	177.3	72.6	75.65	23.09	107	71	4.6	31	5.5	1.03	1.68	2.77
1618	1	0	2	GG	GG	GG	CC	GG	20	160.9	53.4	62.6	20.62	104	75	4.5	13	0.3	0.68	1.36	2.33
1619	1	1	0	GA	GA	GA	GC	AG	27	164.6	68.9	82.6	25.43	111	67	4.4	13	10.9	1.04	0.9	1.71
1620	1	0	1	GA	GA	GA	GC	AG	22	161.4	43.6	60.2	16.73	88	54	4.9	16	0.19	0.58	1.87	2.05
1621	1	0	2	GA	GA	GA	GC	AG	21	161.3	59.9	70.133	23.02	111	74	4.7	34	0.6	0.85	1.26	2.8
1622	1	1	0	AA	AA	GA	GG	AA	23	170.9	83.2	84	28.48	125	79	4.8	38	0.8	0.81	1.21	2.25
1623	1	0	1		GA	GA	GC	AG	26	154.8	52.3	71.15	21.82	104	75	4.9	13	0.19	0.49	1.57	1.86
1624	1	0	0	GA	AA	GA	GC	AG	29	170.5	65.6	72.5	22.56	128	74	4.7	25	0.7	0.54	1.42	2.57
1625	1	1	0	GA	GA	GA	GC	AG	28	161.6	59.3	71.1	22.7	120	67	.	.	.	.	.	.
1626	1	0	0	GA	GA	GA	GC	AG	20	166	53.9	65.25	19.56	122	76	.	.	.	.	.	.
